# Supplementary material for: Comparative pathogenomics of Clostridium tetani
Source: PLoS One. 2017 Aug 11;12(8):e0182909. doi: 10.1371/journal.pone.0182909 (PMC5553647; doi:10.1371/journal.pone.0182909)
Supplement: S4 Table — CRISPR/Cas arrays were analyzed by CRISPR finder (http://crispr.u-psud.fr/). Shown are repeat sequences for CRISPRs identified in C. tetani strains. The number of actual CRISPR arrays in each is likely lower because the majority of genome information is unfinished WGS data. For all strains with the exception of 184.08, ATCC 453/454, and GTC-14772, two primary arrays exist having unique spacers (SP). A defective CRISPR/Cas system identified in strain 184.08, contained few spacer sequences. (XLSX) [file pone.0182909.s008.xlsx]

## Sheet: CRISPR CAS 1-A BLAST
	CRISPR Cas type I-A Genomic location in E88 UK 1206919 - 1217129
Protein #	E88 UK Genomic region start	End	Accession #	Gene name	# AA	Predicted AA sequence
1	1206919	1207515	WP_011099377.1	transposase	198	MYRLMSSLNLLGDSTKYRKPRISRICESIRVAGSNQLWQMDIKYCFITGTRKTAYITSIIDVFDRSIVSQSIDLSATGNVAKSVLLKRLYCRGLKDSPNGLIIRTDNGSQFISGVFEKACLREEVIHERIPVRSPNYNAYIESFHRYLQDECLTGKIYMTLEDLKIDVEDYVYRYNHERIHSSIGYYSPHDYYIKNVS
2	1207827	1208132	WP_035109981.1	transposase	101	MSKVKFKRTFTEEDRISYVKEVLECGSNILVAKKYDINQVQLSTWVNNYRRYSQTLTPKKPKDVDIIPNYKKEYKKVVEQLKEKELEIAILKDLLKKKNRL
3	1208850	1209593	WP_011099378.1	Cas6	247	MRFCLTLHLKEKIFLIEYRKVILSYIKNAISKCNNGKYYECFFKDTKQKDYCFSVILPNPTFTKNEIILNGNEIKVLFSTNNNSKIGFILFSAFIAQKNKPYPLPNNNSMILKNINNKKQEEIFNSKAIFKTTLGSGLCVRDHDKEENKDTYYVYTDEKFREKLKVVLIKQILKAGFTEEEANDIKVNPIQCKKVVVKHYRRYIDTTTGLFEIQANNKILQHFYDVGIGSRKSMGFGMIDLVTQDLL
4	1209608	1210951	WP_011099379.1	CRISPR-associated protein Csx8; Cas8a1/Csx8	447	MKTSIQNEKYDTMLEPSDWRFSATIVGLLQYLNYHDLDYKLEEDYILYNSSGINEERYLDFVEYKYGEELHHRLVENILSNEEITEEQLKLINEKLVANTIMKKTFGKIKFDNTNKKEILDIINKNRYELIRETFRRKSNMYANYGNTNQLFNDSQDHCRLLGYCIDTGKKGKSTGFNFMMSTFVGSDIKEFDFIPFAFEGSREAFFINDNYTIQRLKISNEILSKKIEDDLEGENKRKDARQTLFKAIMETSDFIKRDVEVILKDISKEYFETLYIRKESIDIFKEFINEKIEYKSFCFSHKVTDKYYINIQKKVTESILNNVLLDELIEIFLKEKNRSYLVLQLIKINVLIRRDKTMKDRLKGAFACAKQVSKAIESNKLDSYKQKLTSSIIFKDYD…
5	1210967	1211866	WP_035109979.1	CRISPR-associated protein cas7/cst2/devr	299	MKDKKALTLTVVANMTSNYSEGLGNIASVQKVFKNRKVYTIRSRESLKNAIMVQSGMYDDLQTEVDGATQKLANKELNASNCRALEGGYMSTKGTTNIRKSSFYLTDAISCESFVNETRFHNNLYLANNAAQAKNINLQEKSSEAGLMPYQYEYDKSLKIYSITIDLEMIGKDENFQQEEDYKEADNKEKADRVNSILNAIENLSLTVKGNLDNAEPVFVVGGLSNRKTHYFENVVKVEEEKLIISEDLKDKIEKGYHVGLLEGKTLQNEKEIKEQLNPISITKFFDMIRHEVNTYFGI
6	1211894	1212976	WP_011099381.1	Cas5	360	MKALRIVLTQSSANYKKEETIDNKMTYPLPPISTIIGAIHDACGYKDYHPIDISVQGKFESMHKEPYTDYCFLNSVMDDRGILIKMKNESLLSNAFDKVASAKKSQGNSFRKGITIQVYNEELLKEYRDLKDLNDKIAHYKKNEFKEKLDSIKAAKTKLAEDKKKLDKKSKEFEDIIKREKEVKLKEKNFKQKVKEFELEKYTKPISKFRSLTTSLKYYEILNNVELVIHIRSDEKTLNEIEENIYNLKSIGRSEDFVNIIEAKIVTLTESDDYEIKSNYSAYLNYDDVKNEKVWFENTKADRKVSGTKYYINKNYIIKDDKRFFEKKKVIYGSQYFIEETSENIFIDNEENKEYIVNFI
7	1213045	1215306	WP_035110462.1	CRISPR-associated helicase Cas3	753	MLDDDILKLIEEKKAKPDKTIKEHTLELIEVLNLLRELGYIKNDKIYNLVEKACIYHDLGKLNKEFQKRVNGKNVKFNETKEVVHNILSLYFINSKNFESKENYLKVAHSVLNHHNYCNNFDEISEKEELIKSLIEGFKTYKVKRSTISKLKSIVSDIDSIKVKGYLHKCDYSASSGNKAEYPNNFLENGLNNLLIKWKKGTKEATWNELQNFCIENKDENIIAIAQTGMGKTEAGLLWIGNTKGFFVLPIRTAINAIYDRVRKDILNNKGIDEKIAILHSSSLEYYIRNITGDTNEKEEIDLMNYHKIGKQLSIPINISTMDQIFDFVYKYPGYELKLTTLSYSKIVIDEIQAYGPDLLAYLICGLEKIAELGGRIAILTATLPPFIKDLLQKNIKFI…
8	1215335	1215829	WP_035110461.1	Cas4	164	MKKEITGVMIYYYKVCKRKLWYFYNEIQMEQGNESVEIGKAIDEETYRRDKKHINIDNIINIDFIRSKGILHEVKKSNKIEEASILQVKYYLYFLNKRGIENIKGKIDYPLLKQNIDVELTREDVTIIEGILDDIQNIVKASNPPNLEKKRICKSCAYYDLCFI
9	1215847	1216839	WP_011099384.1	Cas1	330	MKRSYYIYNNGILKRKDNSMAFIDELGERRYIPIETANEIYVMSEMDFNTSLINYLSQYDVIIHFFNYYSFYTGSFQPRKKLVSGNLLVNQVNHYSDNSKRLEIAKKFVDGASYNIYRNLRYYNGRGKDVQIYMDKIEALRKQIYVSTNINELMGYEGNIRKIYYEAWNIIIDQKIDFTKRVKNPPDNMINTLISFVNTLIYTKVVGAIYHTQLNPTVSYLHEPGVRRFSLSLDIAEIFKPILADRLIFSLLNKKQITKKSFTKELNYLHLTKDASKIIVGELDQKIQTTIKHKDLNKNVSYEYLMRLECYKLIKHLLGEKEYEPFKIWW
10	1216851	1217129	WP_035109977.1	Cas2	92	MYVILVYDIKSGEEGQRVLNRTFKVCKKYLSHIQNSVFEGELAESQIIKLKYELDDIIRKDKDSVILFKSRNKRWLTKDMWGKKEDRTSNFI
	CRISPR Cas protein Tn - Tn - Cas6 - Csx8/Cas8b2 ? - Cas7/devR - Cas5 - Cas3 - Cas4 - Cas1 - Cas2			Large linker spacer array here
	NCBI BLAST HIT	% Identity	Predicted AA sequence
1	>gi|822570601|gb|KLE16526.1| CRISPR-associated protein Cas6 [Clostridium sp. C8]	0.7	MRFCLTLQLKERFLTVEYRRIILSFIKNALTKYDNGKYYEDFFKDTKQKDYCFSVILPKPIFTNDKVIIDKNEIKIIFSMKSNLEMTFILFNAFIEQINKQYPLPNNNLMVLKNINKEKQQEIINSKVIFRTAVGSGICVRNHDKEKNTDTYYVYNDKEFREKIKVVLSNQLLNSGFTEEEVNEVNINPIQCKKVVVKHYKRYIDTSVGLFEIKANNKILQHLYEVGVGSRKSMGFGLMDLVTQDLL
2	>gi|507134123|gb|EOR26386.1| hypothetical protein A500_08196 [Clostridium sartagoforme AAU1]	0.75	MRFCLILELKEPKIPIEYRKIVLSYIKNAISKCNDGKYYEDFFKDTKQKEYCFSVIFPKSRFTKDKITLEGNEIKILFSTGNNKLGLILYQAFIAQKNKQYPLPNDNFIKLKSIINNNQKEIYNNRAIFKTTLGSGLCVRSHDPETNKDIYYVYNDEKFREKLNVVLTNQLLNVGFTKEESEEIKVNPIQCKKVVVKHYRRYIDITTGIFEIQGNNKVLQYFYDSGIGSRKSMGFGMIDLVTQDLV
3	>gi|517419193|ref|WP_018590787.1| CRISPR-associated endoribonuclease Cas6 [Terrisporobacter glycolicus]	0.54	MRFELIFQLKNKTFPVDYRRVILSYIKKSLQDMSDGKYYEKYFKDTIQKDFSFSVQFPKMKFTKENIELEEDKIKVLFTTDNTKKTGLLLQQSFIKQKYKDFNIPNNNSMTLININQKREQKITNSKVIFKTYGLCVRDHNKESNKDTHYTYQDERFNEQLKIVLANEAKKAGFSQSLIDNLKFIPLNCKKVLIKHYGVYVDTTVGTFFLEGHPSLLQYFYNVGLGSRRAMFGYLDLVTQDL
4	>gi|375303535|gb|AFA49669.1| CRISPR-associated endoribonuclease Cas6 [Acetobacterium woodii DSM 1030]	0.49	MIIPLDYRKVFIAFIKKALTEAKGGEYFEKFYRDTLAKSFSFSVVFKQPDFKKDKIILGANQLKVLFTAIDDAQVSLIMYMAFIEQKNKAFPLPFENEMVLRTIYEKKAEKIETNKVIFKTAPGSGLCVREHNRETNGDNYYVFNDEAFTEKLFTVLRSQAERAGFNKQVAEKIRCKPLNCKKVVVKHYGCLLNISIGMLQMEADVKLLQYFYDAGIGSRHSAGFGLVDLVAQDLF
5	>gi|167652891|gb|EDR97020.1| CRISPR-associated endoribonuclease Cas6 [Anaerostipes caccae DSM 14662]	0.47	MRLELQLDLEKPELSKDYRRIVLSYLKFALSECNDGKYFEKYFKDTIQKDYCFSVLMKGPKFSKDKILLEEPRIKILFSCDDRRKTGLILFSAFLGIKNRNFPLANNNAMVLKRIDQKSEKLITESTVYMQTVLGNGLCIREHDRETNRDRFITFEDEDFKEKASEVLSVQAKLAGFSDKKASGISLEPVQCKKVVVLHYGVYIDVTVGIIKMTGDPDVLQYLYSAGAGSKHSAGFGALNVLRQGESI
6	>gi|313691483|gb|EFS28318.1| CRISPR-associated endoribonuclease cas6 [Fusobacterium gonidiaformans ATCC 25563]	0.44	MRFILKFQLSTMRIPIEIRRTMISFIKKSLTQAHDGKYYENFFKDTELKDYCFSIIYPLKQFHKNEIELKKPEISVVFSCTEKQNIAFLLMNVFLLQKNKKFPLPDDEYMILKEIVPVREKEILGNVGIFRSTLGGGIVVREHIKEEKKDIYYSVGDENFLEKLDWIMKKRFERLGYPKEMIQFSSKLLEGKKVIVKHFGLTFPVTNGIFEIHAPKILLKEIYRTGLGSRLSQGLGMLEYLGPGGEENEA
7	>gi|316894577|gb|EFV16757.1| CRISPR-associated protein cas6 [Lachnospiraceae bacterium 5_1_63FAA]	0.44	MRLELQMELLKPEIDIDYRRIIISYLKFALEHCEGGRFFEKFYKNRDNIVKDYCFSTVFSKPRFTKEKIYFDKNEMKIIFSCSDRNRTGLIFQTAFLAIQHMKFPLANENHMILRKIIQKKEVLITESVVYFQTILGNGLCVREHNRETNRDTFITCEDKEFSEKAETIIKNQLQMVGFYKNQYKDIKVEPIDCKKIVVKHYGIFIDSTIGVLKISGNMNALQYLYQSGLGSHHSSGFGAVNVIRQGEDE
8	>gi|524478789|emb|CDC19288.1| CRISPR-associated endoribonuclease Cas6 [Eubacterium sp. CAG:274]	0.43	MKFQLTFSLDKPEIPTKDYRRIFASIIKNALSRYMDGQLFEKFYKDTKQKDFTWSVIFNKPEFSGEGIKLGKNEIKMIFSTYDRENTGYFMYSAFLKLLNKSLPLDNGNAIHLLSIKQFNQKIIDKNSCIFKTVTGAPIVVREHNREDNTDKYYTSFNDEFDFELTEGLKRQAVLAGFSQSDVNEISAKAINCNKNVVYNYGAYIDANTGFIEISAKPYILQYFYQAGILAHRSIGFGMIDLIAQKNI
9	>gi|291379933|gb|EFE87451.1| CRISPR-associated endoribonuclease Cas6 [Fusobacterium periodonticum ATCC 33693]	0.43	MRFILNFELDTVIIPVEIRRTVISFFKKSLTEAHDSKYYPEFFTGTQIKDYSFSVIFPLDKYLEEEIYLKKPEMKVIVSCPEKNNIGFLLVNVFLSQRNKKFPLPKNTHMILKDIRIIEEKTLRGEKAIFQTTIGGGIVVRDHNKEKNKDIYYSVGDEKFEEVLNWLMKERFKRLGYPEDIFKDFSCKLLQGRKIIVKHFDLKFPITTGRFKIKAPKILLEEIYRTGMGSRLSQGFGLLEYLGGEIKDEV
10	>gi|576677453|gb|EUB31018.1| CRISPR-associated endoribonuclease Cas6 [Fusobacterium sp. OBRC1]	0.39	MRFILSFELDTVKLPIEIRRTVISFFKKSLTEAHNSKYYPEFFTGTQIKDYSFSVIFPLDKYYGEEIYLKKPEMKVVVSCSEKNNIGFLLVNVFLSQRNKKFPLPKDTCMILKDVRIIEEKTIRGEEAIFQTTIGGGIVVREHNKEENKDVYYSMSDEKFEEVLNWLMKERFKRLGYPEDIFKDFSCELLDGRKIVVKHFDLKFPVTTGKFKVKAPKILLEEIYRTGMGSRLSQGFGLLEYLGGEIKDEV
		0.508
1	>gi|918024212|ref|WP_052314775.1| transposase [Clostridium senegalense]	0.71	MKNLNLLDPNRKRTLKRVSRVCESRTIIKSNQLWQMDIKYAFIAGTKRTAYITSIIDVFDRELVSTSIDLSATGEVAKKVLIKGLYSRGIKDNPNGLVIRTDNGSQFISGIFEKSCLDEKVIHERIPVKSPNYNAFIESYHRYLQDECLTGSIYWSLDDIRNNINDFVYRYNNERIHSSIGYVTPHEYYLKNLMCV
2	>gi|507127013|gb|EOR19821.1| transposase [Clostridium sartagoforme AAU1]	0.55	MGILHERTERVRKYKRICKNHKVSNSNQLWEMDTKYVFIAGTREVAYLTSIIDVFDRSIIAYDLSLSANASAAERVTITALYNRKIKGHVNGLTLRTDNGSQFIAHKFEKLCLKENIMHERIPVHSPNYNAHIESYHRYLQDECLTGKMFLTFDEAEDTIERYVNGYNTKRVHSSIDYRTPNEFYNLKNCNFKNNLVISV
3	>gi|938892654|ref|WP_054677243.1| transposase [Clostridium sp. Hs50]	0.52	MNLLGKKKLRIKRYSKVCKNHVIKDSNQLWEMDMKYVYIAETKQVAYLVSIIDVFDRSILAYDLALSADAKQAETVVIKALYNRGIKGKISKLIVRTDNESQFIASKFEKLCIQENIIHERIPAHSPNYNAHIESYHRYIQQECFTGKLFKDLDDAENTIKKYVDNYNLKRIHSSIDYRTPNEFYNLINSNFKNRLVISI
4	>gi|134265963|gb|ABO66158.1| Transposase [Geobacillus thermodenitrificans NG80-2]	0.43	MGEGFAYGYRKLTIQLRRDHQLVISKKKVYRLCKAMDLLRPQREKRIPYPKKLARNRIITGSNQLWEMDVKYGYIEGEERFFFVLSLIDVYDRSVIDYHIGLSCSGSDAVKTLQRALFKRQQFEQANKPVIRTDNGPQFISHAFEAACERFGIEHERIPPRTPNMNAHIEAFHRLLEEECLGRMAFDSYEEAYQAVMEYMKFYNERRIHSSILDLPPHEFYKKAQTESLIIKEVRV
5	>gi|942229295|gb|KQC45936.1| integrase [Geobacillus sp. Sah69]	0.43	MEVAEQWIKKGYPITKVLEILEINRSTYYYQQNGKVEKKTVGGGRPTPGYSLTATGEKVPDEQIQEWLSELVMGEGFAYGYRKLTIQLRRDHQLVISKKKVYRLCKAMDLLRPQREKRIPYPKKLARNRIITGSNQLWEMDVKYGYIEGEERFFFVLSLIDVYDRSVIDYHIGLSCSGSDAVKTLQRALFKRQQFEQANKPVIRTDNGPQFISHAFEAACERFGIEHERIPPRTPNMNAHIEAFHRLLEEECLGRMAFDSYEEAYQAVMEYMKFYNERRIHSSILDLPPHEFYKKAQTESLIIKEVRV
6	>gi|736827933|ref|WP_034829445.1| integrase [Clostridium pasteurianum]	0.44	MESIDGDAINYGYRKITYHLRKYYNLIINPKKVYRLCKELNVLKEQRVIKPKVKRTIAANRIVTGSNQLWEMDIKYGYIQGQDKFFYLLNLIDIFDRSIIDYHMGYHCEAKDAAALLRKCLMRRNLFEDGAKKPVIRTDNGPQFVSYKFSECCEKVKVEHERIPVKTPNKNAHVESFHRILEDECLKINEFQTYADAYESVNEFMIRYNNRRMHSSLGFMSPNEFYTLHFGENLTGIEIRV
7	>gi|196209680|gb|EDY04453.1| Integrase catalytic region [Geobacillus sp. G11MC16]	0.42	MEVAEQWIKKRYPITKVLEILEINRSTYYYQQNGKVEKKTVGGGRPTPGYSLTATGEKVPDEQIQEWLSELVMGEGFAYGYRKLTIQLRRDHQLVISKKKVYRLCKAMDLLRPQREKRIPYPKKLARNRIITGSNQLWEMDVKYGYIEGEERFFFVLSLIDVYDRSVIDYHIGLSCSGSDAVKTLQRALFKRQQFEQANKPVIRTDNGPQFISHAFEAACERFGIEHERIPPRTPNMNAHMEAFHRLLEEECLGRMAFDSYEEAYQAVMEYMKFYNERRIHSSILDLPPHEFHKKAQTESLIIKEVRV
8	>gi|941327293|gb|KQB94176.1| integrase [Geobacillus sp. PA-3]	0.42	MDLLRPQREKRIPYPKKLARNRIITGSNQLWEMDVKYGYIEGEERFFFVLSLIDVYDRSVIDYHIGLSCSGSDAVKTLQRALFKRQQFEQANKPVIRTDNGPQFISHAFEAACERFGIEHERIPPRTPNMNAHMEAFHRLLEEECLGRMAFDSYEEAYQAVMEYMKFYNERRIHSSILDLPPHEFHKKAQTESLI
9	>gi|736828091|ref|WP_034829603.1| integrase [Clostridium pasteurianum]	0.44	MESIDGDAINYGYRKITYHLRKYYNLIINPKKVYRLCKELGILKDQRVIKPKVKKTIAANRIITGSNQLWEMDIKYGYIHGQDKFFYLLNLIDIFDRSIIDYHMGFHCEAKDASALLRKCLIRRNLFEEGVNKPVIRTDNGPQFVSYKFSECCEEIKVEHERIPVKTPNKNAHIESFHRILEDECFKNNEFETYAQAYEAVNDFMVRYNDRRIHSSLGFMSPNEFYTLHFRENLTGIEIRV
10	>gi|939329731|ref|WP_054876464.1| integrase [Oxobacter pfennigii]	0.44	MEAIQEDAFYYGYHKITHTLRREHKLIINHKKVYRLCKELQVLKGQRVIKPQVKSRISVNRIIKKSNELWEADIKYGYILGENKFFFVLSIIDVFDRSIIDYYIGYRCTGSDAASLLRRCLIKRNLFNSTINPVIRTDNGPQFISHIFEDSCAEIHVYHERIPSRTPNKNAHIEAFHRIFQDECIGVYEFNNYKDAYTEVSRFMKRYNTNRIHSSLKYKTPNEFYAQNLGKEIESMAIRL
		0.48
1	>gi|517419194|ref|WP_018590788.1| type I CRISPR-associated protein Cas8a1/Csx8 [Terrisporobacter glycolicus]	0.55	MKTMLQDNEKFDIKLEPSDWRFSASILGLIEYFESIDPLNDFHEIEEDSILYNSNSITKEKYLNFVEKKYGQDLHHKFVEDRVRYFSKIDNDEIDLEKIKEINARFSKNASGNTIMENVFKKTKFDGSNSEEILSLIESNREELICETFRNKKDMYANFCNTNQMLNDDQNYCRLLGYCIDAGKKGKSIGYAFNANSFAGQDICEFDFIPFAFINDRESIFINDNYEINRLSNTKKILEAKIKNDSNTEGKYKSARYFLFKGIIESSDFIDYDVEVIVKNRDKDYFETLYIRKPSIEILRAIGKSKIDYNSLCFSYKITDDYYIDIYRKVMDSILNNILLDEIIDLLLKENRNNYKINQLLRINDLIRGGAMMNSKKVLDARMVSKIHACAKAVKGKIQ…
2	>gi|917386419|ref|WP_051993131.1| type I CRISPR-associated protein Cas8a1/Csx8 [Clostridium sartagoforme]	0.72	MKTTLENNSYDTMLEPSDWRFSAAIVGLMQYLDYHDLDYKVEDDCIYYNREDLNEEKYLEFVEYKYGEELHHKVVENILSKEDLSDEEIKLVNDKLSANTIMKKTFGKLKYDKTNKQQILDIIIKNRNELIRETFRSKSDMYANYANTNQLFNDSQENCRLLGYYIDSGKKGKSTAFNFNTSTFVGRDEREFDFIPFAFEGKREGFFINDNYTVERLKISNKTLRIKVEGELDSSRKSKDIRQILFKGIIESTDFIDRDIEVIFKDRDKSYFETLYIRKESIDIFKKWLKKI
3	>gi|652489711|ref|WP_026884232.1| type I CRISPR-associated protein Cas8a1/Csx8 [Clostridium akagii]	0.51	MKSIIKNERFDTKMETSDWRYSASIVGLIKYFNYLVGKGYETEANVYKIDEDLISYDSEAITEERYLLFVEDYFERAMHHKVVEEILSSAEFTVEQIKLVNDKLKANTIMKKIFGDIKFSGENRELILQKINENRLLLIKETYRTGKSLYADFSNTNSLFEEPGSICRIQNYNIDAPKKSKSISYNWDFKTYKFDDEKEFDFIPFAFSKSYEAFFINNNYSIRELYKTNNLLSNSNNPRSTLFCDLKNSSDYIDFDVEVIIKNRNVDYFETLYIRKDAIKIFKAIDEYKAIKIRYKINDNYYIDFEKKVTDKILNNIKLDELIEMLIKSNSNYSYNIKTLIKINTLIYGGDKMDKQMKSAYASAKRVMREIPENKVNSYKQKLISAITFKDYERFCEIL…
4	>gi|375303534|gb|AFA49668.1| CRISPR-associated protein Csx8 [Acetobacterium woodii DSM 1030]	0.49	MVEEFVIDEKSYFKLSATEWRYSAAALGLMRYFDFLEIPWIEKAFDVLSLPEIAKELQKSIVCVYERSTGFEYLCFAKEYLSEEDYLRFVREIYPNDLYPFLIEEQLKKSVFEEAEIKEINTWLTGNTVMKKIFGKTKFTGENKDEILTIIKANKDLSTKESFRYKKNLYANYANTHQLLNEGGDSCRLSGYSIDMGKKGRSTAYNFNVKTSTNMDTILFDWIPFAFIGDREAFFINANYDLKQLKKINTFLRTQVKKDRDDDKNKNQNVRYSLFNSMIFSSQFINFDVEVIYKNRERDFFETLYIRHESMEILKSMDKINYKAFCFSLKINDNYYIDIQEKITNCILNLVLTDELIELFLKQKNSNGYLVSQCIEINWLIRKGGEVMKKKMSGAYACA…
5	>gi|167652890|gb|EDR97019.1| CRISPR-associated protein Csx8 (provisional) [Anaerostipes caccae DSM 14662]	0.46	MKELREQLEPLDWRYSAAIVGLEKYLTWLGDEASDWELKEDKLEYDGSYIQKSKFAKFVEYSFPDDMHHLQIEELLQTPDLSDDQISLVNSKMKGNTILKKVFKKLAFDGENAVEVLSLIEENREMITLETFRNKTNLYRNYCNTFQLFEDGKECCRLLGYYIDMPKKGKSISYNFNKANFHGTDMQVFDFIPFAFHGKREMMFINDNIELSCLVETNGRWAESVQQEKKVSEKEGKKLNTRQMFFKLLLESDTFITGDVEVIVKNPDQTFFETLYIRRDSLKILKSLEKSYKYLCFSIKEAENYWVDIQKEVTESILNFTLLDHLINYLLKKPDVNNYGYVINQLIKINIKIKGADKMDGAMKSAFKSAKTVVDKRENGSYKVPDNKLSSYNKKLTSA…
6	>gi|524478790|emb|CDC19289.1| conserved protein [Eubacterium sp. CAG:274]	0.46	MYEKNGVEYSTRTECIDWRYSAAILGLVKFYEYAQIKGFDLKFDYDEDYIYYNIEDITEELFLGFAENSFKKDMHHVFVENAIRDKNEFTEDEIKIINERLLGNTTLKKYFSKNKFNGENKSEILDLINANRQEIIRETFRNKTNLYRNYNNTNSLFSEKKENCRVLGYCIDMPKKGKSVGYNFNTSTFVAEDDVVFDFIPFGFVMGSDAVFINNNSSIKNLETTNNVLAMELDKKEKENDNNRALSAKNVLFNMIVESSDYIDYDVEVITKKRENDYFETLYIRKESIEVFQCIKKKIQDYSYFARKYKVNDNYYIDIQDKVIDAVLNMTNVTDIIQILLKDDNASDSLKYSFLIDKLIKVNVMITGGVDMYEEKEKCINSAKYCAFHITKNSLMSGN…
7	>gi|932950692|emb|CUP85431.1| CRISPR-associated Csx8 family protein [Clostridium baratii]	0.49	MKNIINEGKFDYSIETSDWRYSASIVGLIKYFKFLHRKGIEEKDNLYKIYDDVLKYNSKSITEENYLLFVEEFFSKEMHHITLESILSNDEITEEQEKIVNEKLKANSVMKSIFNKIKYTEDNKSIILELINKNRLEIIRKTYEKGLKLYKKFNNENSLFSEEGKSCRILNYYIDMAKKGKSLGYFWDSNSFVYEDDEVFDFIPFAFSKSYEAFFINNNYSIKELLKSNSLIENSDNPRDTLFGELKNSSEYIDFDVEVIIKNQSDAYYKTLFLRKDTIKILREIENYKGIKVVYKDKNPKSPDYLEKDIIDCILNKVRLDSIIEMLLKSSKYNYSYNIKTLIEINKLIYGGDIMNQNMKGAFAAAKSVNKALEANKINSYKQKLISSITFKDYDRFCE…
8	>gi|170710899|gb|EDT23081.1| crispr-associated protein Csx8 [Clostridium perfringens B str. ATCC 3626]	0.47	MEEKVFDCTLETGDWRYSAAIVGLIKYFDFLYQNGVADKSELYEFEDDYLRYNSNYISEENYLLFVEKYFKDAMHHKVVENILLKDELSEDEIVLINDKLKANQAMKSIFGKIKYTGENKEEILDLIEKNRLKLIKETYRRGKSLYSNFANENLLFSDNNKVCRLVNYCADMGKKGKSLGYYWDNNTFEFKDEKIFDFIPFAFSKSYDTFFINNNVSIKELKKSNSFIENSENTRTTLFGNMKESAEYIGFDVEVILKSRDKNYYETVYVREKAINIFKQSDDFDYKGIKFWYRDDEKNPKYMEPEIVNRILNGIRMDSIIELLFKSKNNHSYNIKTLITINNLIYEGGSEMTKKMKSAYASAKRVSEKLEENKLNSYKQKLISAVTFKNKDRFCEILL…
9	>gi|110682480|gb|ABG85850.1| putative CRISPR-associated protein Csx8 [Clostridium perfringens SM101]	0.47	MEEKVFDCTLESGDWRESATIVGLIKYFDFLYQNGVADKSELYEFEDDYLRYNSNYISEENYLLFVEKYFKDAMHHKVVENILLKDELSEDEISIINDKLKANQAMKSIFGKIKYTGENKEEILDLIEKNRLKLIKETYRRGKSLYSNFANENLLFSDNNKVCRLVNYCADMGKKGKSLGYYWDNNTFEFKDEKIFDFIPFAFSKSYDAFFINNNVSIKELKKSNSFIENSENTRTTLFGNMKESAEYIGFDVEVILKSRDKNYYETVYVREKAINIFKQSDDFDYKGIKFWYRDDEKNSKYMEPEVVNRILNGIRMDSIIELLFKSKNNHSYNIKTLIAINNLIYEGGSEMTEKMKSAYASAKEVRDKLKNQENKINSYKQKLISAVTFKDKDRFCEI…
10	>gi|649361789|gb|KDR95721.1| CRISPR-associated Csx8 family protein [Clostridium litorale DSM 5388]	0.46	MKKTNMTGDYDTKLIASDWRYSAMIVGLKKYFDFFDIEFKANKDKDYIEYNAKDITDSRYLQFVEHHYREYMHHKVIEDIFENEEISEEQSKLINKKLKGNAMMEKTFAKLTYEDKKEILMRIDENREAIIRETYRNGIHMYRKFANENSLFAEKEKTCRLKGYYVDPGRKTKSVSYMNDYNTFIFEDEPEFDFIPFAFTKSSESIFINNNYNLRTLYETARKLEDVFTEHREEVGKSTRELLFNYKQNAATFIDYDVEVITKDIDVDYYKTLYIRKPAIEIFKAINNYKCMMFTKKIGKDYYIDIQKEVTNSILNLSHIDKIIEMLLKEKTGRAGGLIHINSLIYGGDKMDQKMKSAYGTALKLKEKFKKESKLNKIDSYRQRLISAITLKDYDKFCD…
11	>gi|822570602|gb|KLE16527.1| CRISPR-associated protein Cas8a1_1-A/Cst1 [Clostridium sp. C8]	LOW	MENLIRIDIGDWMINAGIVGICNILENAGDKVTKKANYITIDRSYLDNFEEKYFKYFIDTYRGTLSWNKIISYKGILDNFENSDFKNFTEESLENLNVYIKDTVKYYLKSNSYIAAYELIDNNIDILALERKLTTINLKKKENLEDKLPQIKETIKVIREIIDYFSMEKSKKYLAGKNVIYTIIKNAWNGISFLNAQTKEKDMYVDYKNYFVNPAIDELEANKEKYKYHCFICNNEMKDLNNDLSFLNGIGFDVNRKPSHVWNFNNDVAICNFCKLVYSCIPAGISYGAGSGIFINANINAENLIKVNENIKESILRNSDGIKSLSYKSLISAIQKQEHDSFKYELADIQVIRYEDERYKFNILSRNSLKIIKNSKEQLDRLIKSGYIENKKFYSIYEL…
		0.503333
1	>gi|736418098|ref|WP_034440448.1| transposase [Candidatus Clostridium anorexicamassiliense]	0.72	MSKVVFKRTFSEEQRVAYVKEVLESGSNILIAKKYDINPVQLSTWVNNYRRYSQTLKPKNPKEGEIVPNYKKEYQKFKGENEELKLKIAILEDLLKKNSQR
2	>gi|497977280|ref|WP_010291436.1| transposase [Clostridium senegalense]	0.71	MSKVVFKRKFSEEQRVAYVKEVLESGSNSLIAKKYDINPVQLSTWVNNYRRYSQTIKPKNPKEGEIIPNYKKEYHKFKDENEELKLKIAILEDLLKKNNQH
3	>gi|507127012|gb|EOR19820.1| transposase IS3/IS911 family protein [Clostridium sartagoforme AAU1]	0.6	MSTRFIRKFTEEERVAIVIEALECGSNSLVASKYNINPQQLSNWKGNYRRYHQTIKPKDCKEKELIQDYKKAYLKAIEENKEKDLEIAVLRDLLKKKK
4	>gi|938892628|ref|WP_054677219.1| transposase [Clostridium sp. Hs50]	0.56	MSDKFVRRYTEEERVKFVEEALSCGSNALVEAKYNLNKSLLSRWKCNYRRYKQTLKPEDAKEPETDEIIVDYKKEYKKTQEKCKELELEVTVLRDLLKKSK
5	>gi|497977267|ref|WP_010291423.1| transposase [Clostridium senegalense]	0.59	MSGNFIRKYTEEERVKIVEEALACGSNSLVAAKYNIHSGLVSNWKCNYRRYKQTLKPKNATQPKDEEIIVDYKKEYKKTKEKCKDLELEVAILHDLLKKKK
6	>gi|653173946|ref|WP_027416919.1| transposase [Aneurinibacillus terranovensis]	0.41	MTRRNYSADFKLQVVHEVLETGNNAVVARKHDINANMLARWVRQYKANHEVTASRGKPNQMTKEEQQKIMQEYTEISTENEQLKKLLGEKDLEIAILRDLVKKKNPHLLTNWK
7	>gi|333821960|gb|AEG14623.1| transposase IS3/IS911 family protein [Desulfotomaculum kuznetsovii DSM 6115]	0.37	MTRNKYSPELKMQVVKEAMETGNASIVARRHEICPTLVGRWVRNYKRYGTFHPVKEQNNMRETSYSSREYKTVVQENEKLKKLLGEKDLEIAILRDLLKKTNPHLPIK
8	>gi|409105503|gb|AFV11628.1| transposase, IS3/IS911 family [Thermacetogenium phaeum DSM 12270]	0.38	MNRKQYSPEMKIQIVKETLETGNASIVARRHDIAPSLVARWARCYKRYGTFYSQKEVPGTNGSCIPPDYKKITKENEQLKKLLGEKDLEIAILRDLLKKTNLPFPIK
9	>gi|939715717|ref|WP_054948915.1| transposase [bacterium mt3]	0.35	MKRRQFTKEFKIQVAKEAMEVGNQALVARRYDLGSNLLNRWVREYKDGHYGDVPIESAQPREFSDLAQENDQLKRLLGEKDLEIAILRDLVKKQHPHLLKRLK
		0.519333
1	>gi|507134122|gb|EOR26385.1| hypothetical protein A500_08181 [Clostridium sartagoforme AAU1]	0.89	MKIKKALTLTVVANMTSNYSEGLGNIASVQKIFKNRKVYTIRSRESLKNAIMVQSGMYDDLQTEVDGATQKMANENLNASNCRALEGGYMSTKGTTYIRKSSFYLTDAISCESFVNETRFHNNLYLANNAAKSKNINLQEKAGEAGLMPYQYEYDKSFKIYSITIDLEMIGKDENFKQEEGYKEADNKEKADRINSILDAVENLSLTVKGNLDNSEPIFIVGGLSDKKTHYFENVVKVEEDKLIISEDLKDKIEKGYHVGLLEGKALKNENEIKAELNPISITKFFDNVRNEVKTYFNV
2	>gi|517419195|ref|WP_018590789.1| type I-B CRISPR-associated protein Cas7/Cst2/DevR [Terrisporobacter glycolicus]	0.79	MENKKYKALTLTVVANMTSNYSEGLGNIASLQKVFRNRKVYTIRSRESLKNAIMVESGMYDDLKTESNGATQKVANTELNASNCRALEGGYMNTKGTTNIRKSSFYLTDAISCESFVNETRFHNNLYLATNLAKELNLNIQANPKETGLMPYQYEYDKSLKVYSITIDLEMIGKDENFENDKDYKEATKEEKADRVNSILSAIENLSLTVKGNLDNAEPIFVVGGLSDRKTHYFENVVRVEEDRLVVSQDLIEKVSKEYNVGLLRGQAFINEGEIEEKLRPMSIIGFFDNLRQDVNTYFEV
3	>gi|375303533|gb|AFA49667.1| CRISPR-associated regulatory protein DevR family Cst2 [Acetobacterium woodii DSM 1030]	0.73	MKKALTLTVVANMTANYSEGLGNISSVQKVFKNKKVYSIRSRESLKNAIMVQSGLYDDLQTEVDGATQKLVTEKLTAANCKALEGGYMSTKGTTYIRKSSFYLTDAISTDNFVNETRFHNNLYLASTEAKQKGINLQEKSKESGLMPYQYEYDKSLKVYSFTMDLEMVGKDENFNAEATSAEKANRVIAIVEAIENLSLVVKGNLDNAEPVFVIGGLSPRKTHFFENVVRVQGEKLIISDDLLGKLEKGFNCGLLRGNEFLNEEEIVEKLKPQNMTAFFNDIKSEINNWYGV
4	>gi|524566993|emb|CDC92387.1| cRISPR-associated regulatory protein DevR family [Firmicutes bacterium CAG:227]	0.73	MKKNSLTLTVVANMTSNYSESLGNIASVQKVFKNRKIYSMRSRESLKNAIMVQSGMYDDLETSLDGAAQKKVSEELNASNCRALEGGYMNTQGTTYVRKSSFYLTDAVAAEHFVNETRFHNNLYLATNYAKEQGISVQSNGGSAGLMPYQYEYDKSLKIYSMTIDLEMIGKDENFHEEADAKEKAERVIALLDAVENLSLVVRGNLDNAEPVFVVGGLSERKTHYFENVVHVEEEKLILSEDLKIKLEKGFQAGLLRGNLLQNEEEIEKELAPVSVPVFFENLRKQVLDYYLEK
5	>gi|652489710|ref|WP_026884231.1| type I-B CRISPR-associated protein Cas7/Cst2/DevR [Clostridium akagii]	0.7	MNKRALTLTVVANITSNYGEGLGNISSVQKVFKNGKSYATRSRESLKNAIMVQSGMYDDLQTSVDKATQKFVSKDLNVTNCRALEGGYMNTTGNTYIRKSSFYLTDAIACDDFVNETRFHNNLFLASNFAKNNNLNLQADAGKSGLMPYQYEYDKTMKIYSITIDLEMIGKDENFESPEAGDKEKADRVNAILDAVENLNLVVKGNLDNAEPLYVVGGLIDRKTHYFENVVKVKEDKLLITEDLKDRIAKGCNAALLEGGNFKNEIEIKNEVTTTSVAKFFEGLRKQVNIYYGV
6	>gi|167652889|gb|EDR97018.1| CRISPR-associated regulatory protein, DevR family [Anaerostipes caccae DSM 14662]	0.7	MKKNALTLTVVANMTSNYSEGLGNIASVQKVFKNQKIYSMRSRESLKNAIMVQSGWYDDLETEVDGAAQKKVNAELNAANCRALEGGYMNTQGTTYVRKSSFYLTDAIAADHFINETRFHNNLYMASNYAKENGLSVQESGGKVGLMPYQYEYDKSLKVYSLTVDLQMIGKDENFEGEASQTEKLERVTALLNAVENLSLTVKGNLDNAEPVFIVGGLSKRKTHYFENVVNVKHANLMISEDLKEKLKEGFHAGLLRGNLLENEDEIEKELAPVSISAFFKELRKEVEEYYSN
7	>gi|524478791|emb|CDC19290.1| conserved protein [Eubacterium sp. CAG:274]	0.71	MSKNSLTLTVVANMTSNYSENLGNIASVQKVFKKGKIYSMRSRESLKNAIMVQSGMYDDLQTQVDGAAQKLVNDEVTAATTRALEGGYLSTKGTTYVRNSSFYLTDAISCDEFVNETRFHNNLYLATNRAKALGISVQEGTGKGNEVGLMPFQYEYDKSLKVYSMTIDLTMIGKDSNFDTEEALNEEKAKRVISLIDAVENLSLVVRGNLDNAEPLFVVGGLSERKTHYFENVVNVKANKLIISDDLKDKINKGFRVGFLKGMTFENESEIVEKLKPISVSDFFDDLRSDVKAYYGC
8	>gi|316894574|gb|EFV16754.1| devr family CRISPR-associated regulatory protein [Lachnospiraceae bacterium 5_1_63FAA]	0.71	MNKKALTLTVVANMTSNYSEGLGNVASVQKVFKNRRIYSMRSRESLKNAIMIQSGWYDDLETEVDGATQKKVNEDLNAINCRALEGGYMNTQATTYVRRSSFYVTDAISTEHFISEPRFHNNLYMATNYAKSKGLSVKEPGKNNIGLMPYQYEYDKSLKIYSITIDLEMIGKDENFEGEADAKEKADRVICLLDAIENLSLVVKGNLDNAEPIFAVGGLSPRKTHYFENVVNVEEAKLIISSDLKNKIDRGFYAGLLQGNLLENEEEIEEELHPLTITEMFDKLRQEVKEYYLG
9	>gi|932950691|emb|CUP85409.1| CRISPR-associated autoregulator DevR family protein protein [Clostridium baratii]	0.68	MNKKSLTLTVLSNITSNYGEGLGNISSVQKVFRNGKIYATRSRESLKNGIMVQSGLYDDLETIIDKKVNQKAVSKDLNVTNCRALEGGYMNTVNNTYVRNSSFYLTDAVACNEFVNEYRFHNNLYMATNYAKEKGINLQAKAGEAGLMPYQYEYDKSLKQYSMTIDLEMIGRDENFDSEEVSNEEKATRVKMLLNAVENLSLVVKGNLDNAEPIFIVGGLVNRKTHYFENVVSVKNNKLEVTEDLKDRIDNGCYVGLLEGENLANEGEIKEKLNPLSIRKFFAKLEEEVDNYYGI
10	>gi|689620663|gb|KGE62813.1| CRISPR-associated protein cas7/cst2/devr, subtype I-b/tneap [Fusobacterium periodonticum 2_1_31]	0.67	MKKNALTVTIVANMTSNYSEGLGNISSVQKIYRDRNVYAIRSRESLKNAIMVQSGMYEDLETEANGATQKKVDENLNATNCRALEGGYMNTKESTYVRNSSFYLTDAISTESFINETRFHNNLYLATNYANANNLNVQKDAGKVGLMPYQYEYEKSLKVYSLTIDLEKVGKDPNFPDKEADNKEKFERVKSILEAIENLSLVVKGNLDNAEPVFAIGGLSLRKTHYFENVVRVEQGALVLGETLKEKKEDGFNCALLKGDIFTNEAEIIKELQPASMKEFFKSLTEDVKNYYGV
11	>gi|822570602|gb|KLE16527.1| CRISPR-associated protein Cst1 [Clostridium sp. C8]		MENLIRIDIGDWMINAGIVGICNILENAGDKVTKKANYITIDRSYLDNFEEKYFKYFIDTYRGTLSWNKIISYKGILDNFENSDFKNFTEESLENLNVYIKDTVKYYLKSNSYIAAYELIDNNIDILALERKLTTINLKKKENLEDKLPQIKETIKVIREIIDYFSMEKSKKYLAGKNVIYTIIKNAWNGISFLNAQTKEKDMYVDYKNYFVNPAIDELEANKEKYKYHCFICNNEMKDLNNDLSFLNGIGFDVNRKPSHVWNFNNDVAICNFCKLVYSCIPAGISYGAGSGIFINANINAENLIKVNENIKESILRNSDGIKSLSYKSLISAIQKQEHDSFKYELADIQVIRYEDERYKFNILSRNSLKIIKNSKEQLDRLIKSGYIENKKFYSIYEL…
		0.731
1	>gi|507134121|gb|EOR26384.1| hypothetical protein A500_08176 [Clostridium sartagoforme AAU1]	0.77	MKALRIVLTQSSANYKREETIDNKMTYPLPPISTIIGAIHNACNYREYHPMDISVQGRFESMHNEPYTDYCFLNSVMDDRGILVKMKNESLLSSAFDKVASAKKSQGNSFRKGITIQVYNEELLSEYRKLKDLKDKIDDYKKNEYKEKLQEFKSEKSKLTEIKKKLDKKSKEFLELSQKEKEIKIIENEFKEKVKNYEIYNYIKPVSKFRSLTTSLKFYEILNDIELIIHVRSDDETLRNIEENIYNLKSIGRSEDFINIEEAKIVDLKEAEDCDIISNYSAYLNYDDVKNECIYFDKAKAGQSVSGTKYYLNKNYSINDGKRVFEKKKVVYASQYIIESTSDNVLIDDEDNKEYIVNFI
2	>gi|517419196|ref|WP_018590790.1| CRISPR-associated protein Cas5 [Terrisporobacter glycolicus]	0.69	MKALRIELTQNSANYRKEECLDNKMTYPIPPISTIIGGIHNACNYREYHPMDISVQGNFESMHREPYTDYCFLNSTMDDRGILVKMKNESFLSKAFDKVAKANKSQGSSFRKGITIDVYNQKLLDEYNALRDLGDKIKNYKSTEQKQQLEAIKSEKKSLAQQKKELDKKSKEYELLVQKEKEIKDKEKQLKDGLKGYEQENYIKPISKFRSLTTSIKYYEILNNINLVIHVRSDEETLNDILDNIYNLKSIGRSEDFVDIKEAKIVDLYEGDCDVDSNYSTYVNYDDIKNDNIGVKSKGAKDVNGTVYYLNKNYTIVDGKREFIKKRVLYTSYCAIEETSENIFIDNNDGKEYIVNFI
3	>gi|652489709|ref|WP_026884230.1| CRISPR-associated protein Cas5 [Clostridium akagii]	0.63	MEALRIILTQSSANYKKEETVLNKMTYPLPPFSTIIGAIHSACAYRSYHPMDISIQGKYESMHKEPYTDYCFLNSIMDDRGILVKMKNENLLSTAFDKVAKAKKPQGNSFKKGITIEVINEKLLEEYRGLKNLSEKIAQFKTNRVGKALLLIKKRKNTLVDKKKRCEKNSLAFNVIAKRETQIKELEKMIKERLKDYEKEEYKIPYSKFASLTTSLKYYEILNNVELIIHVKSDKNTLMDIKENIYNLKSIGRSEDFVDVKEACFVELVDEVEDGITSEYSAYMDYDLIKNDSIYLKLGDKITANGTKYYLNKNYTIEDNKRVFEKKKVVYISEYGAEEGSDNLYFDVNGEKSYIVNFN
4	>gi|375303532|gb|AFA49666.1| CRISPR-associated protein Cas5 [Acetobacterium woodii DSM 1030]	0.58	MKALRIKLYQSSANYRKEESDTNKMTYPLPPFSTVIGALHEASGYQTYHPMDLSIQGKYESMHREPYTDYCFLNSTMDDRGILVKMRNPELLSSAFDKVAAAQKSQGNSFRKRITIKVFDEILYQEFIALKELNDEIENFKNTRYKRIMDLIKTRKKTIKIKKTEVSKGEIQYEKLCRREKQIKEIEKQIKDEFEKYKEVQYTKPYSKFRSLTTSLKFYEILNNVELVIHVKAEETVLMTILDNIYHLKSIGRSEDFVEVTEAKIVELIQDDNCDVTSSFSAYLDFRDVKNERIFPVAVGGGVNEKGGTRYGLNKTYQIIDDKRIFDKKSVIYLSQYGIDETSETIWLDRDDDQEYIVNFI
5	>gi|167652888|gb|EDR97017.1| CRISPR-associated protein Cas5 [Anaerostipes caccae DSM 14662]	0.58	MNGVKALRIKIRQASANYRKEETTENKMTYPLPPLSTVSGALHSICGYTEYKKMDISIQGKFSSMRKKVYRDYCFLNSTMDDRGTLVKMKNESMLSNAFTQVASAKKSQGNSFFNGTTIQVHDESLLQEYRDLKVLGNKIAEWKSTEYKERIQNYKQEKNRLAEQKKTAEKGSNEYDEIVQKEKQIKAEEKEWKKKVSDYETSNYKVPISKFRSLTTSIKYYEILDNVQLILHIRAEEEVLNDIYHHIYDLKSLGRSEDFVEVTDAELVELLETDETVRSPYSAYLHYDDVKNRRIYTGMGPERLMFGTKYYLGKKYEIQDGKRIFIEKIPVVYTSDFKIRKTSENIWIDDQKNIVNFL
6	>gi|524478792|emb|CDC19291.1| conserved protein [Eubacterium sp. CAG:274]	0.6	MKCLRIKLTQSSANYRREETVTNKMTYPLPPMSTVIGALHNACGYTETHPMDVSIQGKFESMGKKAYTDYCFLNSTMDDRGILVKMNDSEKLSKAYTRVASAKKTQGNSFRKGITINVENEELLEEYRSLKNLNDEISDFKKNRLKAVLDKLKKSKAKYADLKKKSEKGSDEYNFALRRENRVKGLEKELNKRVKDYELNNYTLPVSKFRSLTTSLKFYEILYGIELIIHISADEDTLNDIYNNVYNIKSIGRSEDFVNVTDAEFVELYDELPEDEIRSEYSSYLGIDTVRDDIVYTKTKKGQAIVGTKYSLNKLYKIENGKRIFEKKRVIYTSEYYIEECSKEHNVFYDGEYIVNLI
7	>gi|655473136|ref|WP_028855975.1| CRISPR-associated protein Cas5 [Psychrilyobacter atlanticus]	0.57	MKALRLVLTQNKAHYKKEETITNKMTYPLPPLSTVIGALHNACNFREYHPMDLSIQGTYSSLLKQPYTDYCFLNSVMDDRGILVKMKNNNLISTAFDKVAVAKKSMGNSFRKGITIEVKNPDLMDEYRKLKNLNDKISNFKRTRIERLKRIFKVRKKSLADKKKNLIKKSWKYKSVDLREKEVRKKEKNINEKIKAFEYNNYTREISKYNSLTTSIRYYEILHDVNLIIHVKTDDKTLEIIKENIYNLKSIGRSEDFVDISECEIVELVQDLSEEVIDELEGFIGKNSAYLDYQKIKENDITLKNKNGTKYFLNKNYEICGNKRIFNKKTVVYTSEYGIHEDSGDIYIDTRKMKNGERENYIVNFI
8	>gi|932950690|emb|CUP85380.1| CRISPR-associated protein Cas5 [Clostridium baratii]	0.6	MEALRIVLKQNSANYKKEETSLNKMTYPLPPFSTVIGAIHNACNYKEYKPMDISIQGNYESLTLEPYTDYCFLNTVMDDRGILVKFKNSNSLSMAYEKVAKALKAQGNSFRKGTTIQVYNEDLLEEFRDLRDLSEKIGGELKKEKDDKLKLIKDEKKDLSEKKKELKGDKTALEEIKKKEAELKLKEKGIKDEFENFKEENYTKPYSRFASLTTSLKYYETLNNVNLIIHIRSDKETLLDIEKNIYNLKSIGRSEDFVDIQEVKMVKLLEEVEDQDEIINLNSAYVDFDLVKEEVIESIKSSDSKSCSGTKYYLNKDYKIIDNKRVFNKRKVLFISEYMVEKAAENVYFDIDDNNKYIVNFI
9	>gi|524752441|emb|CDE55654.1| conserved protein [Roseburia sp. CAG:303]	0.55	MKALRLHLHQNSANYRKEETINNKMTYPLPPYSTVIGALHDACGFKEYKAMDISIQGNFQSLQKRAYTDHCFLNTTQDDRGNLVKLYNPDCLSKGYILVGSAIKSQGNSFRKDITVKTVNQECMQEYRELKDLKDKIDIYKKNEYADKLQEFKEKKKSLAQQKKEADSKSDAYQIILEEEKRVKLEEKEYKERVRKYEEENYKIPISYFRTLTTSLKFYELLDDIELYIHVKSDEETLKKILENIYRLKSLGRSEDFVEVLDADIVELKESVDKEIKSKFAGYVSEKAVKGKDIFTRDRNIRYGGGTKYFINKNYEYSEDGKQRVFHKKKVYYLSGYSVDEESENLYFDTIDENTTLIVNFE
10	>gi|170710894|gb|EDT23076.1| crispr-associated protein Cas5 [Clostridium perfringens B str. ATCC 3626]	0.57	MKALRIILTQNSANYRREETTVNKMTYPLPPFSTVIGAIHNACNYKEYKPMDISIQGTYESMGLEPYTDYCFLNTVMDDRGILVKLRNGKYLSNSFDKVAKALKSQGNSFREGKTIQVYNEKLLEEYRNLKDLKDKIDEFSRGKLKEVLNLIKLRKKTLSSKKKELKDNKEKLELIKKREFQIKNLEKRLKSEFDDYKEKNYNEPYSKFASLTTSLKYYETLYNVKLIIHVRCEDENTLLDIKENIYNLKSIGRSEDFVDIKEVKIVDLVEEGKELKRRIVNTNSAYVDYNLVKGKIIRSRNLSDSKECNGTKYLLNKNYEILDKKRGFKKKKVVYLSNYVVRKKVDNVYYDLGEEESYIVNFI
11	>gi|822570603|gb|KLE16528.1| CRISPR-associated protein Cas5 [Clostridium sp. C8]		MERAVRIKLTQDLVNYKKPTSFQLKETYPLPPFSTVIGMVHSLCGYDEYKKMKVSVQGRSVSKTNDLYTRYEFKSGMKYDETRHQLKVGEFGVSRGVATAELLVDVELLIHIIPEDDSLIEEIEKAFRYPKEYPSLGRREDLVTIEEVKVVSVRNEVPRKSIDGEKSYGAYIPLEIINSIKMKNSIQGVKFTGTRYRLNKNYKPVNYGTEKLPKIFRKWHKEEVIYATNISFLRKHESYLDDDNYLVFAV
		0.614
1	>gi|507134120|gb|EOR26383.1| ATP-dependent RNA helicase [Clostridium sartagoforme AAU1]	0.77	MEEKLYILDKDTLELIQKYMAKPDKTIKEHTLDLLENLNVLQRLGYIEEGKLFELVEKACIYHDLGKVNCEFQNRVTGKSKKFNESKEVVHNVLSLYLIDSNNFESFEDYLKVAHSVLNHHNYCNNFDEISDKTELIQGLLNDFKTYKIKKSTKSKLKCMVENNEGIKIKGYLHKCDYSASSGNIAEYPNNFLEDSLHGLLEKWKNNNSEASWNKLQKFCMENRDENIIAIAQTGMGKTEAGLLWISDNKGFFVLPIRTAINAIYDRVRNDILDNKSIDEKIAILHSSALEYYIKNIESNNAEKEEIDLLNYHKVGKQLSIPLNISTMDQIFDFVYKYQGYELKATTLSYSKIVIDEIQAYGPDLLAYLICGLEKVVELGGKIAILTATLPPFIKDLLI…
2	>gi|517419197|ref|WP_018590791.1| CRISPR-associated helicase/endonuclease Cas3 [Terrisporobacter glycolicus]	0.6	MSEENLYSELLDESIINEINKRLAKPRKTIKEHTDDLLNVLYLLRDLGYIKDDKIYKLVKKACIYHDIGKINDEFQFRVKSEKKIPFNDDKEISHNILSLYFIDESKFDSKEDYLRVANAVINHHDYCDISEILRSKQELINSLLDKFEHKKVKKKASSNISKISQNIDAIKIKGYLHKCDYSASSIDKDGNKNYEAEYINYFLNESLNNLLNRWKSNNPNSTWNKLQNFCIENKNENIIAIAQTGMGKTEAGLLWIGDNKGFFILPIRTAINAIYDRIEKEILNIKDDKSSVDKINNKVGLLHSSSLEYLLSQEANKKDNKEAKIEDKENQEILKYENTAKQLSLPLNISTLDQLFDFVYKYPAYELKLTTLSYSKLVIDEIQMYSPDLLAYLIYGIE…
3	>gi|753982495|ref|WP_041669104.1| CRISPR-associated helicase/endonuclease Cas3 [Acetobacterium woodii]	0.52	MKNPEDYQAKPDKTIKEHSLELIDELDRLNNLGYIKNDQIYELTKKACWYHDFGKANKEFQKRVMSEKKIRMSLEREVFHNILSVFLIQPDAFESKDDYYKVTQAILFHHDYAESYEDVYDQLKSRKELCTALLNEFPLVPIKNRLQLELIKRIEDDQVVKIKGLLHKCDYSASGGFVAEYPNDFLESGLENLGYDWNDLQKFCIDHRNENIIAVAQTGMGKTEAGLLWIGNYKGYFVLPLRTAINAIYQRIVGDETKKIVSEKLDERVALLHSSSLSYYLEMAEKNKKELVEMGMDGIDVEEYQKRGHQHSIPLNISTMDQLFDFVFKYQGYELKLATLSYSKIVVDEIQMYDSDLLAYLIMGLKRICELGGQVAILTATLAPFVEDELKMAIPGIIK…
4	>gi|375303531|gb|AFA49665.1| CRISPR-associated helicase Cas3 [Acetobacterium woodii DSM 1030]	0.52	MNDEGEGKMKNPEDYQAKPDKTIKEHSLELIDELDRLNNLGYIKNDQIYELTKKACWYHDFGKANKEFQKRVMSEKKIRMSLEREVFHNILSVFLIQPDAFESKDDYYKVTQAILFHHDYAESYEDVYDQLKSRKELCTALLNEFPLVPIKNRLQLELIKRIEDDQVVKIKGLLHKCDYSASGGFVAEYPNDFLESGLENLGYDWNDLQKFCIDHRNENIIAVAQTGMGKTEAGLLWIGNYKGYFVLPLRTAINAIYQRIVGDETKKIVSEKLDERVALLHSSSLSYYLEMAEKNKKELVEMGMDGIDVEEYQKRGHQHSIPLNISTMDQLFDFVFKYQGYELKLATLSYSKIVVDEIQMYDSDLLAYLIMGLKRICELGGQVAILTATLAPFVEDELK…
5	>gi|110683275|gb|ABG86645.1| CRISPR-associated helicase Cas3 domain protein [Clostridium perfringens SM101]	0.52	MDLSKFTAKLYKIIKEDKIIKENKTVREHTNDLLNNLEFLNDLGYINKESIYNLTKIACEYHDYGKVNREFQNRIKNETKFNEKKEIAHNVLSLYFINPDDFEEEKDYYRVCFAVLYHHYYCDGLKVLSEKTDLIENLLSEFETYELDEFTPMEIGDIKSDDEAILIKGFLNKCDFSASGNTEIEYKNNFLEESLERLLNSWKIDNKEAKWNELQQFAKNNRDNNIMVVAQTGMGKTEAGLHWIGNNKGFFILPLKTAINAIYDRVSNGIVKENNNEEKHKVALIHSDSLSYYISQNEDTNIVLDHHREGKQLSIPISIATLDQIFDFVFKYKGYEVKLATLSYSKVVIDEIQMYSADLLAYLILGIKTIIRLGGKVAILTATLAPFVKDLLLEDNNKL…
6	>gi|932950689|emb|CUP85354.1| CRISPR-associated helicase Cas3 domain-containing protein [Clostridium baratii]	0.52	MDLSIYKAKPDKSIREHTDDLLNNLEYLKGLGYIKDEKILNLTKIACEYHDFGKANREFQYRIKHGTDFNTEKEIAHNLLSLYFINPEEFDSKEDYYRVCFAVLFHHYYYDDNLKTLIEEKELIEDLLSDFEIYKLKPNTPKRIGKIRGDNEAVLVKGFVNKCDFSASGGTKIEYINDFLDMSLENLLSSWKAKNKNASWNELQNFCKNNSNENIIVVAQTGMGKTEAGLHWIGDNKGFFILPLKTAINAIYKRISEDIVSDEIEHKVALIHSDTLSYYNDNSHKNIDILTYKKEGKQLAIPLNITTLDQIFDFVLKYKGYELKAATLSYSKVVIDEIQMYSADLLAYLIYGVKSIIKLGGKVAILTATLAPFIKDLLIGEDNEFNFKESTFVNDLKRH…
7	>gi|917017593|ref|WP_051624305.1| CRISPR-associated helicase/endonuclease Cas3 [Clostridium akagii]	0.51	MLIRSGIVDLSIYKAKSDKTIRQHTDELLINLDILENLNYIKNQHTYNLTKIACEYHDYGKANREFQNRIKNNTKFNENTEMAHNVLSLYFINENEFANNEDYYKVAFAVLYHHNYCDGLKALQDKESKELAKNLLSDFKVNTIKMRTPKRIKEITENQEAILIKGFLHKCDYSASGGIPIEYQNDFLNYGLDNLLKKWKAHNNNSKWNELQQFCKENTNKNIVVVAQTGMGKTEAGLHWIGNNKGFFILPLKTAINSIYKRIKKDILDENHIETKLALLHSDALSFYNNDKNNEMDIMDYYNQSKQLSLPLSISTLDQLFDFVFKYQGYELKLATLSYSKIVIDEIQMYGSDLLAYLIYGIKTVNKFGGKIAILTATLAPFIRDKLKSGENPIEFQEK…
8	>gi|316894571|gb|EFV16751.1| CRISPR-associated helicase cas3 [Lachnospiraceae bacterium 5_1_63FAA]	0.5	MIKDLYDYLAKPDKTIGEHVEDLIFRANILRKLGYIKDIHIYNLLIQACKGHDLGKANKEFLKRILNPKLHFDETKEISHNILSVYYLDKNEFDENTDDYLIVACCILFHHDYCNEPLVIKTRTSQINSLLIPEYNQKPSRRMLKNICNNYLKKQETIIVKGLLHRCDYSASGNYEIEYPNDFLEAGLAQMMNEWQKKKKDSCWNELQEFCIENREENIIALAPTGMGKTEAGLLWIGNHKGFFILPIRTAINAIYDRIKNQILKDEKLEERLGLLHSESLSYYGSHVGQEMDILDYRNKGQALSLPLNISTLDQLFDFVFKYKGYELKLATLAYSKIVIDEIQMYDAEMLAYLIYGLRRIHELGGKIAIVTATLPPFIKKLLRDKNIGNIEFKERDFT…
9	>gi|524478793|emb|CDC19292.1| crispr-associated helicase Cas3 domain protein [Eubacterium sp. CAG:274]	0.49	MDLDKYLAKGNKTIAQHINDLQHCLEVLVNLGYVETEHLKTLIYIACKYHDYGKVNPEFQKRVSSIKWIKFDKDIEIAHNVLSTFFINSDEFDDFNDYLKVFFAVAYHHNYCDVDEVFRKKRDLIYKLLENFEIYKVKNSVLSKLVKTKIMEERESILLKGFLHKCDYCASAECEVEFKNDFLDNSLEDLKNSWRVDNPNADWKEMQNYCYENSDENIIVVAQTGMGKTEGGLRWIGNHKGFFVLPLKTAINAMYDRIKEDILKNDVKEKLSILHSESLNYVIKKHPEIDDPKEYNDRGKKLSMPLTVTTMDQLFDFVFKYNGYEMKLTTFSYSKIVIDEIQMYGPELLAYLIRGIEMITEMGGKVAIITATLPPFIRDLLGDKFKYKEFIDDSVKRHN…
10	>gi|167652887|gb|EDR97016.1| CRISPR-associated helicase Cas3 [Anaerostipes caccae DSM 14662]	0.47	MKLQEYLAKPNKTIAEHAQDLIRQAEILWDFHYINDKYIFDLLCQACLHHDDGKANKEFQKRVRNGKLKFNPEKEVPHNILSIFYLDPSFYLHSSKYQYEDFMRVACAILYHHDYCEEWKVLREKRDLIDSLLLDEYKHEFDDENELVGIYPSDPQTILLKGLLHRCDYSASGNYQVEYPNDFLIKGLDQMMQAWKVKNPKSKWNELQEFCIEHREDDIIALAPTGMGKTEAGLHWIGDNKGFFVLPVRVAINSIYDRVKNDILKEEKLHERLGLLHSEALEYYREHLSNSEELDIFEYSDRGKILSLPLNISTLDQLFGFIFGYKGYEMKLVTLAYSKIVIDEIQMYDAELLAYLVFGLRKIHQFGGKIAIVTATLSPFLKDILRRDTGIEFKEQQFS…
11	>gi|822570604|gb|KLE16529.1| CRISPR-associated protein Cas3 [Clostridium sp. C8]	0.43	MNRYLAKSDTMETIQDHTNKLLGNYNILKEIYPNLLDVKWWDILYRACLYHDLGKMNLKFQDKMEKGKKSSLEIPHGILSLAFIDYEKMEDEGFNEDEIKTLFHAIAYHHERELSYEDDELEREIELLANEYDGFNYDKLKEECYLDQIDEMYFYKDDRIYENEDIFFKYIMVKGLLNRLDYAASGHIEVEKKNDFLEDSLNNLLNKWKKEKPKSKWNELQEYMIQNRNKNLVVIAQTGMGKTEAGLLWIGDNKGFFTLPLKTAINSIYDRVVKLVKENIDDRIGLLHSDTLSEYINKSAEKDEDKAKYKDIDYIEYYNKTKQMSLPLTICTLDQIFDFVYKYRGFEPKLATLAYSKIVIDEIQMYSPDLLAYLIVGLSNINSVGGKFAILTATLPSFV…
		0.531818
1	>gi|822570606|gb|KLE16531.1| CRISPR-associated protein Cas1 [Clostridium sp. C8]	0.91	MKRSYYIYNNGELKRKDNSIAFIDEEGEKRYIPIETVNEIYVMSEMNFNTSLINFLSQYDVVVHFFNYYSFYTGSFQPREKLVSGNLLVNQVTHYTDEKKRLEIAKRFIDGASYNIYRNLRYYNGRGKDVQSYMDKIETLRKGIYTSNNINELMGYEGNIRKVYYEAWNIIIDQKIDFTKRVKNPPDNMINTLISFVNTLVYTKVLGAIYHTQLNPTVSYLHEPGVRRFSLSLDIAEIFKPILADRLIFSLLNKKQITEKSFTKELNYLHLTKEASKIIVGELDQKLQTTIKHKDLNKSVSYEYLMRLECYKLIKHLLGEKDYDPFKIWW
2	>gi|507134118|gb|EOR26381.1| CRISPR-associated protein Cas1 [Clostridium sartagoforme AAU1]	0.9	MKRSYYIYNNGELKRKDNSIAFIDEEGQKRYIPIETVNEIYVMSEMNFNTSLVNFLSQYDVVVHFFNYYSFYTGSFQPREKLVSGNLLVNQVTHYTDEKKRLEIAKRFIDGASYNIYRNLRYYNGRGKDVQSYMDKIETLRKGIYTSNNINELMGYEGNIRKVYYEAWNIIIDQKIDFTKRVKNPPDNMINTLISFVNTLVYTKVLGAIYHTQLNPTVSYLHEPGVRRFSLSLDIAEIFKPILADRLIFSLLNKKQITEKSFTKELNYLHLTKEASKIIVGELDQKLQTTIKHKDLNKSVSYEYLMRLECYKLIKHLLEEKDYDPFKIWW
3	>gi|517419199|ref|WP_018590793.1| subtype I-B CRISPR-associated endonuclease Cas1 [Terrisporobacter glycolicus]	0.83	MKRSYYIYNNGLLKRQDNSIAFVDEEGVKKYIPIETVNEIYVMSEMDFNTNLINYLSQYGVVAHFFNYYSFYTGSFQPREKLVSGNLLVNQVNNYIDEEKRLEIAKRFIDGASFNIYRNLRYYNGRGKDVQSYMNRIEDLRKQIPKSKSIKELMGYEGNIRKIYYESWNILIDPDINFIKRVKNPPDNMINTLISYVNTLIYTKVLSAIYNTQLNPTVSYLHEPGSRRFSLSLDIAEIFKPIIGDRLIFSLLNKKQITEKSFTKSLNYLHLTKEGSKTIVAELDKKLQTTIKHKELNKDVSYEYLMRLECYKLIKHILGEKEYDPFKIWW
4	>gi|375303529|gb|AFA49663.1| CRISPR-associated endonuclease Cas1 [Acetobacterium woodii DSM 1030]	0.74	MKRDYYFYNDGTIRRKDNTITFINSDEESRNLPIENMGNLYVMSEMSLNTSLINLLSQYGIVVHFFNYYSFYTGSFYPREKLVSGNIIVKQVEHYQDNEKRMGIAQALIDAASYNIYRNLRYYNGRGKDVKMEMADIENLRKNIAGTIGIKELMGYEGNIRKIYYSAWDKIIDQDINFTKRVKNPPDNMINTLISFVNTLVYTKVLGEIYQTQLNPTISYLHEPGTRRFSLSLDIAEIFKPLIADRLIFSLLNRNQITEKSFAKNLNYLHLTKEASKTIVSELDAKLQTTIKHRELDKSVSYQYLIRLECYKMIKHLLGEKEYEAFKIWW
5	>gi|294479962|gb|EFG27739.1| CRISPR-associated endonuclease Cas1, HMARI/TNEAP subtype [Fusobacterium periodonticum 1_1_41FAA]	0.68	MKRSYFLYTNGTLKRKDNTITFINEQDEKRDIPIEMIDDFYVMSEMNFNTKFINYISQFGIPIHFFNYYTFYTGSFYPREMNVSGQLLVKQVEHYTNPQKRIEIAREFIEGASFNIYRNLRYYNGRGKDLKFYMEQIEELRRQLNEVTNVEELMGYEGNIRKIYYEAWNIIVNQEIDFEKRVKNPPDNMINSLISFINTLFYTRVLGEIYKTQLNPTVSYLHQPSTRRFSLSLDISEVFKPLIVDRLIFSLLNKNQITEKSFVKDFNYLRLKEDSSKLIVQEFEDRLKQVITHKDLNRKISYQYLVRLECYKLIKHLLGEKKYQAFQMWW
6	>gi|291379939|gb|EFE87457.1| CRISPR-associated endonuclease Cas1, HMARI/TNEAP subtype [Fusobacterium periodonticum ATCC 33693]	0.68	MLCIGGKNMKRSYFLYTNGTLKRKDNTITFINEQDEKRDIPIEMIDDFYVMSEMNFNTKFINYISQFGIPIHFFNYYTFYTGSFYPREMNVSGQLLVKQVEHYTNPQKRIEIAREFIEGASFNIYRNLRYYNGRGKDLKFYMEQIEELRRQLNEVTNVEELMGYEGNIRKIYYEAWNIIVNQEIDFEKRVKNPPDNMINSLISFINTLFYTRVLGEIYKTQLNPTVSYLHQPSTRRFSLSLDISEVFKPLIVDRLIFSLLNKNQITEKSFVKDFNYLRLKEDASKLIVQEFEERLKQVITHKDLNRKISYQYLVRLECYKLIKHLLDEKKYQAFQMWW
7	>gi|929731940|gb|ALF24565.1| subtype I-B CRISPR-associated endonuclease Cas1 [Fusobacterium nucleatum subsp. nucleatum ChDC F316]	0.68	MKRSFFLYSNGTLKRKDNTITFINEKDEKRDIPIEMVDDFYVMSEMNFNTKFINYISQFGIPIHFFNYYTFYTGSFYPREMNISGQLLVKQVEHYTNEQKRVEIAREFIEGASFNIYRNLRYYNGRGKDLKLYMDQIEELRKRLKEVNNVEELMGYEGNIRKIYYEAWNIIVNQEIDFEKRVKNPPDNMINSLISFVNTLFYTKVLGEIYKTQLNPTVSYLHQPSTRRFSLSLDISEVFKPLIVDRLIFSLLNKNQITEKSFVKDFEYLRLKEDASKLIVQEFEDRLKQIITHKDLNRKISYQYLVRLECYKLIKHLLGEKKYKSFQMWW
8	>gi|296154465|gb|EFG95257.1| CRISPR-associated endonuclease Cas1, HMARI/TNEAP subtype [Fusobacterium nucleatum subsp. nucleatum ATCC 23726]	0.68	MFCIGGLSMKRSFFLYSNGTLKRKDNTITFINEKDEKRDIPIEMVDDFYVMSEMNFNTKFINYISQFGIPIHFFNYYTFYTGSFYPREMNISGQLLVKQVEHYTNEQKRVEIAREFIEGASFNIYRNLRYYNGRGKDLKLYMDQIEELRKRLKEVNNVEELMGYEGNIRKIYYEAWNIIVNQEIDFEKRVKNPPDNMINSLISFVNTLFYTKVLGEIYKTQLNPTVSYLHQPSTRRFSLSLDISEVFKPLIVDRLIFSLLNKNQITEKSFVKDFEYLRLKEDASKLIVQEFEDRLKQIITHKDLNRKISYQYLVRLECYKLIKHLLGEKKYKSFQMWW
9	>gi|313691489|gb|EFS28324.1| CRISPR-associated endonuclease cas1, subtype I-b/hmari/tneap [Fusobacterium gonidiaformans ATCC 25563]	0.69	MKRSYFLYSNGTLKRKDNTITFINENEEKKDIPIEMIDDIYIMSEMNFNTKFINYISQFGIPIHFFNYYTFYTGSFYPRETAVSGQLLVKQVEHYLDKDKRIEIAREFIEGASFNIYRNLRYYNGRGKEVKTYMHQIEELRKQLSKVTDVEELMGYEGNIRKIYYEAWNVIINQEIDFEKRVKNPPDNMINSLISFVNTLFYTKVLGEIYKTQLNSTVSYLHQPSTKRFSLSLDISEIFKPLVVDRLIFSLLNKNQITEKSFIKDFEYLRLKEDASKLIVQELEERLKQVIQHKDLNRKVSYQYLIRLECYKLIKHLLGEKKYLSFQMWW
10	>gi|958165215|gb|ALQ41997.1| type I-B CRISPR-associated endonuclease Cas1 [Fusobacterium nucleatum subsp. polymorphum]	0.68	MKRSFFLYSNGTLKRKDNTITFINEKDEKRDIPIEMVDDFYVMSEMNFNTKFINYISQFGIPIHFFNYYTFYTGSFYPREMNISGQLLVKQVEHYTNEQKRVEIAREFIEGASFNIYRNLRYYNGRGKDLKFYMDQIEELRKHLKEVNNVEELMGYEGNIRKIYYEAWNIIVNQEIDFEKRVKNPPDNMINSLISFVNTLFYTKVLGEIYKTQLNPTVSYLHQPSTRRFSLSLDISEVFKPLIVDRLIFSLLNKNQITEKSFVKDFEYLRLKEDASKLIVQEFEDRLKQIITHKDLNRKISYQYLVRLECYKLIKHLLGEKKYKSFQMWW
11	>gi|652489706|ref|WP_026884227.1| subtype I-B CRISPR-associated endonuclease Cas1 [Clostridium akagii]	0.69	MKRSFYIYNNGEIHRKDNTLRFTNSENEARDIPIEQVEDLYIMSEMTFNTKFITFASQYQIPIHFFNYYSFYTGSFYPKEALLAGNLLVKQVNHYEDEQKRLCIARKFIDAAASNIYRNLRYYNGRGKDVEKVMIEIDSLRKKILKTQSINELMGVEGNIRKQYYSAWNTIVDQKIDFEKRVKNPPDNMINTMISFVNGLVYTRVLGEIYRTQINPTISYLHEPGVRRFSLSLDLAEVFKPILGDRLIFSLLNKNQITPSCFTKELNYLHLNKDASRTIAMKFDEMLKTTIYHKELSKDVTYQHLIRLECYKLIKHLMGEKEYEGFKMWW
12	>gi|167652885|gb|EDR97014.1| CRISPR-associated endonuclease Cas1, HMARI/TNEAP subtype [Anaerostipes caccae DSM 14662]	0.66	MKRSLYVYNNGDLKRKDNTLQFTSYEGEKRDIPIERINDIYVMSEMTFNTAFINYISQYGIPIHFFNYYNFYTGSYYPKESLLAGQLLVKQVEHYTDYEKRIEIARKFINAAADNIYRNLRYYNSRGKELSEFMNEVDHLRKKIPKAKAVDELMGIEGNIRRYYYTAWNEIVNQEIQFEKRVMHPPDNMINSLISFVNSLIYSKTLSEIYHTQLNPTISYLHEPGARRYSLCLDLSEVFKPLIGDRLIFSLLNRKQITEDSFTKELNFLHLKKEASKLIVTEFEDRLKTTIMHKELGKKVSYQYLMRLEAYKLIKHLIGEKEYEGFKIWW
13	>gi|524478795|emb|CDC19294.1| cRISPR-associated endonuclease Cas1 1 [Eubacterium sp. CAG:274]	0.67	MKKSLFVYNEGTLQRHDNTIRFIDTAGNKKDIPIETVGEINIMTQMEFNTSFLNILSQNGIMVHCYNYYDYYIGSFYPKESIISGELLVNQVNHYTDSDKRLKIAQKFIDGAADNIYRNVRYYNARGKDLQSTLDDIDNIRKNIYKSKSVTELMGYEGNIRKIYYKSWNTIVNQNINFEKRVKNPPDNMINTLISFVNTMIYTRVLSEIYKTQLNPTVSFLHEPGTRRFSLALDISEIFKPLLGDRLIFSLLNKNQINECSFTESLNFLHLKKEASQIIARELDSRMQTTIKHKELNRDVSYQYLIRLECYKLIKHLIGEKEYKPFKIWW
		0.73
1	>gi|822570605|gb|KLE16530.1| CRISPR-associated exonuclease Cas4 [Clostridium sp. C8]	0.87	MKKEITGVMVYYYEVCKRKLWYFYNEIQMEQGNESVEIGKAIDEETYKRDKKHINIDNIINIDFIRSKGILHEVKKSNKIEEASILQVKYYLYFLKKREVDNIKGKIDYPLLKQSIDVELTDQDIILIEGILEDIEKIVTLKNPPPLEKKKICKSCAYYDLCFI
2	>gi|507134119|gb|EOR26382.1| hypothetical protein A500_08166 [Clostridium sartagoforme AAU1]	0.87	MKKEITGVMVYYYEVCKRKLWYFYNEIQMEQGNENVEIGKAIDEETYKRDKKHINIDNIINIDFIRSKGILHEVKKSNKIEEASILQVKYYLYFLKKREVDNIKGKIDYPLLKQSIDVELTDQDIILIEGILEDIKKIVALKNPPPLEKKKICKSCAYYDLCFI
3	>gi|652489707|ref|WP_026884228.1| CRISPR-associated protein Cas4 [Clostridium akagii]	0.7	MDKPISGMMIYYYIVCKRKLWYFYNQIQMESDNENVKIGKVLDENAYERADKHINIDDVINIDYIKSKGILHEVKKSKKIEEAGIMQVKYYIYYLKERGVEGIKGKIDYPLLKQSIDVELTDEDEKYIESVLLDLTEIVNRQLPPLLENKRICKSCAYFELCYI
4	>gi|524478794|emb|CDC19293.1| cRISPR-associated protein Cas4 [Eubacterium sp. CAG:274]	0.69	MEKDITGIMVYYYEVCKRKLWYYYHNINMEQNNENVAIGKFIDENSYSRDEKHINIDNVINIDFIKEKGILHEVKKSKKIEEASILQVKYYLYYLSKRDVNVKAKIDYPLLKKNIDVELKEEDKQKIDEILIDIENIVNKDIAPKEDNKKICKNCAFYDLCYI
5	>gi|386907549|gb|EIJ72256.1| CRISPR-associated protein Cas4 [Fusobacterium necrophorum subsp. funduliforme ATCC 51357]	0.62	MKKEITGIMVYYYVVCQRKLWYFLHEIQMEADNSNVILGRLLEENTYTRDEKKIAIDGVINIDFFRAKKILHEIKKSKVMEEASILQVQYYLYYLEKKGLTGMKGILDYPLLKQKVEVELTEMDRKNLEKILSGIEKIMKSSVPPDLEKKSICKKCAYFDLCFV
6	>gi|517419198|ref|WP_018590792.1| CRISPR-associated protein Cas4 [Terrisporobacter glycolicus]	0.77	MEKGITGVMVYYHEVCKRKLWYFYNEIQMEQDNENVEIGKVLDEETYKRDKKHINIDNIINIDFIRTKGILHEVKKSKKIEEASILQVKYYLYFLEKKGVKGIKGKIDYPLLKQSLDIELDNDDIVKIEKVLSEIELIVNEKYPPKLEKKRICKSCAYYDLCFI
7	>gi|375303530|gb|AFA49664.1| CRISPR-associated RecB-family exonuclease Cas4 [Acetobacterium woodii DSM 1030]	0.72	MEKEITGVMVYYYQVCWRKLWYFYHEIQMEQNNDNVQIGKLLDENAYGRDDKHINIDNIINIDFIRTKKVLHEVKKSKKIEAASILQVKYYLYFLMKRGATGISAQIDYPLLKQSVEVSLSDQDVAEIEKILADISKIVKEENPPVLKKLRICKSCAYYDLCYI
8	>gi|260542631|gb|EEX23200.1| CRISPR-associated protein Cas4 [Blautia hansenii DSM 20583]	0.63	MEERITGVMIYYYFVCKRKLWYFCHEINMEAENENVMLGKLLDEHSYQRDEKHINIDNVINIDFIKEHHELHEIKKSKSIEEAGIWQVKYYLYYLKQRGVENIRGKIDYPLLKKNVIVELADEDIKKLEGIISEICKIRKQNVPPEFLETKVCKKCAYHDLCFI
9	>gi|402257600|gb|EJU08074.1| cytoplasmic protein [Fusobacterium hwasookii ChDC F128]	0.61	MDKDITGLMVYYYEVCKRKLWYFINEIQLEENNSNVILGKLLEENTYTRDEKKINIDGVINIDFIRSKKILHEIKKSNSIEPASLLQVQYYLYYLEKKGLIGLKGILDYPLLKQTVEVNLTDKDRENLDNIIIGIKEILRKESPPTLEKKSICKKCAYFDLCFV
10	>gi|929731941|gb|ALF24566.1| CRISPR-associated protein Cas4 [Fusobacterium nucleatum subsp. nucleatum ChDC F316]	0.61	MDKDITGMMVYYYEVCKRKLWYFVNEIQLEKNNSNVILGKLLEENTYTRDEKKINIDGVINIDFIRSKKVLHEIKKSNSIEPASLLQVQYYLYYLEKKGLIGLKGILDYPLLKQTVEVNLTDEDRENLDNIIIGIKEILRKESPPALEKKGICKKCAYFDLCFV
11	>gi|294479961|gb|EFG27738.1| CRISPR-associated protein Cas4 [Fusobacterium periodonticum 1_1_41FAA]	0.61	MDKDITGLMVYYYEVCKRKLWYFTNDIQLEENNSNVILGKLLEENSYTRDEKKINIDGVINIDFIRSKKILHEIKKSNSIEPASILQVQYYLYYLEKKGLVGLKGILDYPLLKQTVEVNLTDSDRENLENIIIGIKEILRKESPPTLEKKNICKKCAYFDLCFV
12	>gi|167652886|gb|EDR97015.1| CRISPR-associated protein Cas4 [Anaerostipes caccae DSM 14662]	0.65	MEERITGVMIYYYFVCKRKLWYFCHEINMEAENESVMLGKLLDENSYRRDEKHINIDNIINIDFIKEHKELHEVKKSKSIEEAGVWQVKYYLYYLWKRGVKNLKAKIDYPLLKKNLIVELKEEDIKKLEGIISEIHEIKELETPPEFCEKKICKKCAYHDLCFI
		0.695833
1	>gi|822570607|gb|KLE16532.1| CRISPR-associated protein Cas2 [Clostridium sp. C8]	0.9	MYVILVYDIKSDDGGQRVLNRTFKICKKYLSHIQNSVFEGELAESQIIKLKYELDGIIRKDKDSIILFKSRNERWLSKDMWGKKEDKTSNFI
2	>gi|507134117|gb|EOR26380.1| CRISPR-associated protein Cas2 [Clostridium sartagoforme AAU1]	0.88	MYVILVYDIKSDDGGQRVLNRTFKICKKYLSNIQNSVFEGELAESQIIKLKYELDGIIRKEKDSIILFKSRNERWLSKDMWGKKEDKTSNFI
3	>gi|517419200|ref|WP_018590794.1| CRISPR-associated endonuclease Cas2 [Terrisporobacter glycolicus]	0.82	MYVILVYDIKSDDGGQRVLSKTFKTCKKYLSHIQNSVFEGELSNSQIIKLQYEINDIIRKDKDSVILFKSRNERWLEKEMWGTQEDKTSNFI
4	>gi|375303528|gb|AFA49662.1| CRISPR-associated protein Cas2 [Acetobacterium woodii DSM 1030]	0.72	MYVILVYDICGDEGGQRVLNKTFKICKKYLNHIQNSVFEGEISEPQILNLKYELNKYIRKDIDSVILFKSRNERWLKKEFWANVEDKTDNFL
5	>gi|524478796|emb|CDC19295.1| cRISPR-associated endoribonuclease Cas2 [Eubacterium sp. CAG:274]	0.7	MYVILVYDISGEEGGEKVLNKVFKICKKYLTHIQNSVFEGELSEVQILKLNKELSEWIRKDLDSVILFKSRSNRWMKKEMWGKNDDATDNFI
6	>gi|652489705|ref|WP_026884226.1| CRISPR-associated endonuclease Cas2 [Clostridium akagii]	0.66	MYVVLVYDICGDENGQRALTRVFKTCKKYLTHIQNSVFEGEITEGQIAKLNAELNKLIRKDLDSVIIFKSRNEKWLDKEFWGKRDDALSNFF
7	>gi|524794348|emb|CDE90312.1| cRISPR-associated endoribonuclease Cas2 [Clostridium sp. CAG:389]	0.69	MKGLKCGGDMYVILVYDINLENKEGQKVLRKVFKICKKYLVHIQNSVFEGELLESQVIKLKSELNKCIRTDKDSVIFFKSRSQRWLEKEFWGKEEEDITDNFL
8	>gi|524752465|emb|CDE55527.1| cRISPR-associated endoribonuclease Cas2 [Roseburia sp. CAG:303]	0.64	MYIILVYDIVMDEEGKKILPKVFKICKKYLSHIQNSVFEGELKKSQIKSLEIELKNIIRKDKDSLIVFSSETSKWMKKEYWGKKEDKTSFFL
9	>gi|472399447|gb|AGI39646.1| CRISPR protein [ [[Clostridium stercorarium subsp. stercorarium DSM 8532]	0.61	MYIILVYDIVLDETGPSVLRKVFKECKKYLVHVQNSVFEGELSESQLFKLEMSLKKLLRKDKDSLIVFKTRNEKWLDKEFWGKEDNATSNFL
10	>gi|167652884|gb|EDR97013.1| CRISPR-associated protein Cas2 [Anaerostipes caccae DSM 14662]	0.61	MYVVLVYDISQSENGQKRWSRVFKICKKYLSHIQNSVFEGEISKVQLVQLQQELKPYVDKDLDSVIIFKSRHERWLDKEFWGKEEDKTSFLI
		0.723
				Tn - Tn - Cas6 - Csx8 - Cas7/devR - Cas5 - Cas3 - Cas4 - Cas1 - Cas2
1	Clostridium sp. C8, sediment sludge Viet Nam Ho Chi Minh City, 2014	0.845	***missing***	Cas2 – Cas1 – Cas4 - Cas3 – Cas5 – Cas7/DevR – Csx8 – Cas6									***
2	Clostridium sartagoforme AAU1, rumen liquor, surti buffalo, India Feb 2009	0.77		Cas2 – Cas1 – Cas4 - Cas3 – Cas5 – Cas7/DevR – Csx8 – Cas6
3	Acetobacterium woodii DSM 1030, USA Woods Hole, Oyster Pond Inlet, <- S. Schoberth <- W.E. Balch, WB1	0.62375		Cas2 – Cas1 – Cas4 - Cas3 – Cas5 – Cas7/DevR – Csx8 – Cas6
4	Clostridium glycolicum ATCC 14880 = DSM 1288	0.69875		Cas2 – Cas1 – Cas4 - Cas3 – Cas5 – Cas7/DevR – Csx8 – Cas6
5	ATCC 14880=BCRC 14553=DSM 1288=JCM 1401=NCIMB 10632=NCTC 13026.
6	Previously, Clostridium glycolicum Gaston and Stadtman 1963 emend. Chamkha et al. 2001 isolated from mud, <- ATCC <- L.W. Gaston, NIH
7	Clostridium akagii DSM 12554 ; <- C. Matthies <- C. H. Kuhner; CK-58. Beech litter; Germany, Fichtelgebirge (7695)	0.628571		Cas2 – Cas1 – Cas4 - Cas3 – Cas5 – Cas7/DevR – Csx8 – Cas6
8	Eubacterium sp. CAG:274 human gut metagenome	0.59375		Cas2 – Cas1 – Cas4 - Cas3 – Cas5 – Cas7/DevR – Csx8 – Cas6
9	Anaerostipes caccae DSM 14662	0.575		Cas2 – Cas1 – Cas4 - Cas3 – Cas5 – Cas7/DevR – Csx8 – Cas6

## Sheet: CRISPR CAS I-B BLAST
	CRISPR Cas type I-B Genomic location in E88 UK 1580563 - 1591906
Protein #	E88 UK Genomic region start	End	Accession #	Gene name	# AA	Predicted AA sequence
1	1580563	1580853	WP_023438399.1	Cas2	96	95.6667	MSKNFNYNYAFVFYDVNEKRVNRVFKTCKKYLSHFQKSVFRGELTPANFILLKKDLNKVINEDEDFICIIKLMNNKVYDEEILGNPHSCTGEDLIL
2	1580854	1581852	WP_011099680.1	Cas1	332	331.667	MGSTRYITSVGELKRKDNSLCFRKNNKNVYIPVENTKEIYCMSEVNINSKLLDFLSQNNIIMHFFNYYEGYSGTFYPREHYNSGKLLVKQVETYENRRLEVAKSIVEAIGDNIYELLYHYYKHDKKEVKETLDWIKNHSKINLKKANDIKQIMQVEGETWQRFYGEFKNILPEEFVMNKRVKRPPDNPINALISFGNTLLYGKTITAIYNTHLDQRISFLHEPSEGRFSLSLDISEAFKPVIVFKTIFDLVNNKRIQVSKHFDKKLNYCLLNDEGRNIFITAFEERMESIFLNEKLKRKISYKTAIKLDCYKLIKFILENKEFKPFSLKERM
3	1581862	1582353	WP_011099681.1	Cas4	163	162.667	MKVNGTLVNYYFHCKRQCWLHGNRINLEDNSQDVKIGKAIHEVKKEKGKQTEISIDNIKIDKITKDYLTEVKKSDSDIEAAKWQLLLYLKVLKDKGIERKGKLEFIEKNKSKSTIIIELDENNLSELEDVIKNIENLLIQENPPEVINESKCKKCAYFEYCYI
4	1582362	1584962	WP_011099682.1	Cas3	866	865.667	MYFNNIEKVNLENIIENNDKIYAHIHNGRKETLKEHSDLALKYLYKISERKSLDNVFLKIENNFLEKCSNEEKMVYRKMLLNTIYMHDLGKINCNFQRKKMANKIFKEEKMSSTNHSMLSSIIYINHFLKEIASIENGEHIKLLIAFLLLNSYVISKHHGAFNSVNKFKEKLVYDGEEGKDLYTKYMYIFDKVYKEEIIINESLIKEDLFDMYKSTIQEKTEENKDFPVELYIYERFLASLLLSCDYYSTSEFKNQKEVEEFGEIKNIEKFYKSFKSTEVYNWIRKYEKNDYGKTDDFSNIDDINVLRNELFLDAEKTMVSNIDKDIFYLEAPTGSGKSNVSFNLSFKMVERFKEINKIFYVYPFNTLVEQNIKTLEKIFKNNEIMKDIAIINSVVPIK…
5	1585019	1585789	WP_011099683.1	Cas5	256	255.667	MDALKFSLSGRTAFFKKPDVNSFFYFTYGNVHKVALLGILGAICGYGGYNSQCLNKEQIYPEFYEKLKDINIGVVPKNEKGYIDKKIQVFNNSVGYASKELGGNLIVKEQWLENPKWAIYILMDENVPKDLKDRLLNFKFKYIPYLGKNDHMANITDVEYLENIEKLDNTNKLDSIFIKDKYEIQKESKNFNDLKNIIKKSSSKIQEFKYEEMLPISLEETTNKYNLETFIYTNSNLKPLADTKTYKCGDKNIFFF
6	1585793	1586746	WP_035125273.1	CRISPR-associated protein Cas7b	317	316.667	MNKRVYGVLGIVSRMSNWNADFTGYPKTTSSGDVFGSDKAFKYPMKKMWENGGEKVLYIKSIKFQENKKKERELIPRTLKERYEYIFDVEDLKKNKDSEEVLKNLFTAVDVKNFGATFAEEGNNISITGAVQIGQGFNKYKETYAEEQQILSPFRDPNQKEKSKDGEEAKSSTLGTKIVSNEAHYFYPLTVNPSAYSQFEEIGVTNGYTEEDYEKFKETSMIAATSFNTNSKIGCENEFALFVETKEDLYLPDLSQYVDFEKVEDKNIIILSCSELLNSFENEIENIEIYYNSYTTEIKSDEIKKAKKFNIFTKKEV
7	1586758	1588497	WP_011099685.1	CRISPR-associated Csh1; Cas8b1	579	578.667	MLKDVISIFKREYEKIGDRYVTESYIPSDGEYIIVDTFENDFKILDKVIIKKDRKTQKIDDSNQYFPFIREADYLSRLLDMNKPIDHKKIIHSNNYLSFFIKKENVNNGKLSDEIIDRYYEILKDPLIKYKNTKAEKLYEEVEEEHGKVNEKLIDEIKNWIKEKIHDFVDKGSKEKEYLKIFFKYDLDKYRKESEKYISPNLYNSNDYNVKIKEEIYGLPNDNMGLNSKKPYLENKTRKSKVPYLISKEEVLIQKKFFDYLMNQVAIGKSNIYINEKGIKGISNKETLGEDFTGYYLRIQKGKEVEIHNFDTIVNYRAKIEPFKLENVLELEKSELNYNVFIYEIGKLKDLIDNVFFYKFLSGNFFTKAEDLNINDATLKRSILLSRDTLFTWFYKGVD…
8	1588510	1589202	WP_011099686.1	Cas6	230	229.667	MKIYELTLKVFLLKDIKSDESLEKISNLIDKSLSKDGKLLDFHERNTYKNYTFNSLYPIEKDKIYNEGKIYSVQIRTVDESLIQYFKKNLTNEYTEYIKALTLECRVIPQRYIEKIYSITPVIIKTEKGYWKGNLSLGEFEERIKNNLIKKYNSFFNTKIDERFTLFRTINLINNKPISCSYKDINILGDKITLIIDENEMAQKLACFSLGSGVGEMNARGYGFVNYKWL
9	1590320	1591906	WP_011099687.1	hypothetical	528	527.667	MKKRFNVTGTCIPERHYMVDISNKLDSILKLVNNEEYFIINRPRQYGKTTTLYLLEKRLNHMKEYLPIKISFEAIDTEGYSKVEKFLSSIMMQIVNYFRFSTNKEMYKFIKNCENQITNMNDFNSFITDLVEFSEKKVVLIIDEVDKSSNNQLFLDFLGMLRSKYLLRNEGKDYTFHSVILAGVHDVKTLKLKIRPDEEHKYNSPWNIASDFDVDMSFSIDEIKTMLDDYVENKKVNLDKEYFAKKIYFYTSGYPFLVSKLCKIIDEKIMVEDELKWEKEYLELAVKELLKESNTNFDSLIKNIENNKELSQIIDNILIKGTRINFNIHNPDINLGYLYGIFKNNKGNLEINNRIYEQLIYEYRISKIQTASNFLNYNLKENFIKCNGDLDITKVLIKF…
	CRISPR/Cas protein: Cas2 - Cas1 - Cas4 - Cas3 - Cas5 - Cas7b - Csh1/Cas8b1 - Cas6 -Cas1 - Cas1
	NCBI BLAST HIT	% Identity	Predicted AA sequence
1	>gi|743962001|dbj|BAQ13939.1| putative CRISPR-associated protein Cas1 [Clostridium botulinum]	0.88	MGSTRYITSIGELKRKDNSLCFRKNNKNVYIPVENTKEIYCMSEVSINSKLLDFLSQNNIVMHFFNYYEGYSGTFYPRKHYNSGKLIVKQVEAYKDKRLMVAKSIVSAIGENIYELLYHYYRHDRTEVKGTLEWIKNDMKINLEKANNIKEIMQVEGETWYRFYGEFKNILPEDFVMNKRVKRPPDNPINALISFGNTLLYGKTITAIYNTHLDQRISFLHEPSEGRFSLSLDISEAFKPVIVFKTIFDLVNNKKIQVSKHFDKKLNYCLLNEEGRKIFITAFEEKLESVFIHKKLKRRVTYKNAIKLDCYKMIKFILEDKEFRPFSLKEKM
2	>gi|914327505|gb|KOA19138.1| CRISPR-associated endonuclease Cas1 [Clostridium homopropionicum DSM 5847]	0.85	MGSTRYITSMGELTRKDNSLCFRKDNKNVYIPIENTKEIYCMSEVSVNSKLLDFLSQNNIVMHFFNYYEGYSGTFYPKEHYNSGKMLVKQVEAYSNKRLIIAKAIVEAIGENIYEVLYHYYKHDKKEVKETIDWIRKDMKVNLHKANDIKQAMQVEGEAWQRFYGEFKHILPEDFVMNKRVKRPPDNPINALISFGNTLLYGKTITIIYNTHLDQRVSFLHEPSEGRFSLSLDLSEAFKPVVVYRTIFDLVNNKKLQLPKHFEKKVNYCLLNEEGRKIFITAFEERLESVFLHEKLKRKVTYRTAIKLDCYKLIKFILEDKEFKPFSLKEKV
3	>gi|923387206|gb|KOR26063.1| CRISPR-associated protein Cas1 [Clostridium sp. L74]	0.65	MGSTRYITSMGELKRKDNSLCFRKDNKNVYIPIENTKEIYCMSEVSINTKLLDFLSRNNIVMHFFNYYEGYSGTFYPKKHFNSGRLLVKQVEAYNDKRFIIAKSIVDGIGKNIYEVLYHYYKHDKKEVKPTLDWIKNVMRVNLEKANDIKEIMQVEGETWHRFYGEFKNILPENFIMNKRVKRPPDNPINALISFGNTLLYGKTITAIYNTHLDQRISFLHEPSEGRFSLSLDISEAFKPIIVFKTIFDLVNKKKIQVSKHFDKKLNYCLLNEEGRKIFITAFEEKLQSVFVHTRLKRKVSYTNAIKLDCYKLIKFILENKEFKPFSLKERM
4	>gi|530689960|gb|EQB88083.1| CRISPR-associated protein Cas1 [Clostridium sp. BL8]	0.64	MGSTRYITSMGELTRKDNSLCFRKGGKNVYIPVENTKEIYCFSEVSINTKLLDFLSQNNITLHFFNYHEGYSGTFYPRTYYNSGKLLIKQVEAFNLRRIEVAKSFVLAIGENIHEVLYHYYKHDKKGVKETIDWIKGDFKENLNKANQIKQILQVEGELWQRFYGDFKYILPEDFIMNKRVKRPPDNPINALISFGNTLLYGKTITSIYNTHLDQRISFLHEPSEGRFSLSLDISEAFKPVIVFKTIFELVNNKRIQVNKHFDKKLNYCLLNEEGRNIFITAFEERLESVFTHPKLKRKITYRTAIKLDCYKLIKFILEDKEFIPFRIKENM
5	>gi|692302162|ref|WP_032123128.1| subtype I-B CRISPR-associated endonuclease Cas1 [Clostridium sp. LF2]	0.63	MGSTRYITSMGELTRKDNSLCFRKDGKNVYIPIENTKEIYCLSEVSINTKLLDFLSQNNIIVHFFNYYGGYSGTFYPRERYNSGRLLVAQVDAYKNNRLEIAKGIVNGIGQNISELLYHYYRHDKKEVKETIDWIKDEFIINLDKAKDIKQLMQVEGEVWQKFYEEFKHILPEDFILNKRVKRPPDNPINALISFGNTLLYGKTIAAIYNTHLDQRISFLHEPSEGRFSLSLDISEVFKPVIVYKTIFDLVNKKKLQVSKHFDKKVNYCLLNEEGRKIFITAFEERMETVFVHPKLKRKVSYRTAIKLDCYKLIKFILEGKEFKPFNLKENM
6	>gi|653616503|ref|WP_027626928.1| subtype I-B CRISPR-associated endonuclease Cas1 [Clostridium lundense]	0.75	MGSTRYITSMGELTRKDNSLCFRKNGKNVYIPVENTKEIYCLNEVSINSKLLDFLATNNIIVHFFNYYEGYSGSFYPRNQYNSGKLLVKQVEAFTNKRLRVAKPIVKGIGDNISEVLYHYYKHGKKEIKTTIDWINKEFIESINKAENVQQLMAAEGEVWQRFYGEFKNILPEDFIMNKRVKRPPDNPINALISFGNTLLYAKTISSIYRTHLDQRISFLHEPSEGRFSLSLDISEVFKPAIVYKTIFELVNNKKLQVAKHFDKKVNYCLLNEEGRNIFIQAFEERLESVFTHPRLKRKVSYRTAIKLDCYKLIKFMMENKEFVPFNLQEKM
7	>gi|749562788|ref|WP_040193682.1| subtype I-B CRISPR-associated endonuclease Cas1 [Clostridium sp. CL-6]	0.77	MGSTRYITSMGELTRKDNSLCFRKDGKNVYIPVENTTEIYCLSEVTLNTKLLDFITSNNIVIHFFNYYEGYSGTYYPKDKYNSGKLLIKQVEAYKDKRLEIAKQIVRIIGVNISEVLYHYYKHDKKEVKGTIDWIRKDFKERIDVVADVKQLMAIEGEVWQRFYGDFKYILPEDFIMNKRVKRPPDNPINALISFGNSLLYTKTISAIYRTHLDQRISFLHEPSEGRFSLSLDISEVFKPVIVYKTIFELVNNKKIQVSRHFDKKVNYCLLNEEGRNIFITAFEERLESVFMHPKLKRKVSYRTAIKLDCYKLIKFIMEDREFTPFSLKEGL
8	>gi|652495113|ref|WP_026889582.1| subtype I-B CRISPR-associated endonuclease Cas1 [Clostridium beijerinckii]	0.78	MGSTRYISSMGELIRKDNSLCFRKDGKNVYIPIENTKEIYCLNEVSINTKLLDFLSQNNIVVHFFNYYEGYSGTFYPKAQYNSGRLLVKQVEKYSDSRMTIAKAIVKGIGINIREVIYHYYKHGKKEVKGTLDWIKGEFFERVENSKDIKVLMSVEGEVWQRFYSEFKNFLPEDFIMNKRVKRPPDNPINALISFGNTLLYTKTISAIYRTHLDQRISYLHEPSEGRFSLSLDVSEVFKPVIVYKTIFDLVNNKRLQVSKHFDKKVNYCLLNEEGRNIFITAFEERLESVFLHPKLKRKVSYRTAIKLDCYKLIKHIMEDKEFVPFSLKEGM
9	>gi|549809561|gb|AGX43467.1| cas1-2: CRISPR-associated endonuclease Cas1 2 [Clostridium saccharobutylicum DSM 13864]	0.77	MGSTRYISSMGELTRKDDSLCFRKEGKNVYIPIENTKEIYCLNEVSINTKLLDFLSQNNVVVHFFNYYEGYSGTFYPKAQYNSGRLLVKQVEKHNNSRMTIAKAIVSGIGINIREVVYHYYKHNKKEVKGTVDWIKKEFFERIEKAQNIKELMSVEGEVWQRFYSEFKNFLPEDFIMNKRVKRPPDNPINALISFGNTLLYTKTISAIYRTHLDQRISYLHEPSEGRFSLSLDISEVFKPVIVYKTIFDLVNNKRLQVNKHFDKKVNYCLLNEEGRNIFITAFEERLESVFLHPKLKRRVSYRTAIKLDCYKLIKYIMEEKEFIPFSLKEGM
10	>gi|237658907|gb|EEP56459.1| crispr-associated protein Cas1 [Clostridium butyricum E4 str. BoNT E BL5262]	0.77	MGSTRYISSMGELTRKDNSLCFRKDGKNVYIPIENTKEIYCLNEISINTKLLDFLSQNHVVVHFFNYYEGYSGTFYPRNQYNSGKLIVKQVEKYSTERMVIAKAIVRGIGINIREVLYHYYKHNKTEVKGTIDWIKNAFFKRVGAANDVKELMSVEGEVWQRFYSEFKNFLPEDFIMNKRVKRPPDNPINALISFGNTLLYTKTISAIYRTHLDQRISFLHEPSEGRFSLSLDISEVFKPVIVYKTIFELVNNKKLQVNKHFDKKVNYCLLNEEGRNIFISAFEERMESVISHPKLKRKVSLRTAIKLDCYKLIKYIMEDQEFIPFSLKEGM
		0.749
1	>gi|923576284|gb|KOR54625.1| CRISPR-associated protein Cas2 [Clostridium botulinum ATCC 25763]	0.84	MGKGFNYNYAFVFYDVNEKRVNRVFKVCKKYLSHFQKSVFRGEITPANLILLKRDLNKEIDECEDFICIIKLMNNNVYGEEILGNKAMTTGEDLIL
2	>gi|923387207|gb|KOR26064.1| CRISPR-associated Cas2 family protein [Clostridium sp. L74]	0.84	MGKKFNYNYAFVFYDVNEKRVNRVFKVCKKYLSHFQKSVFRGEITPANLILLKRDLNKEIDECEDFICIIKLMNNNVYGEEILGNKAMTTGEDLIL
3	>gi|914327506|gb|KOA19139.1| CRISPR-associated endoribonuclease Cas2 [Clostridium homopropionicum DSM 5847]	0.8	MGKNFNYNYAFLFYDVGEKRVNKVFKVCKKYLSHFQKSVFRGEITPANIILLKKDLKKVINENEDFVCIIKLMNDNVYGEEVLGNKQNNTGEDLII
4	>gi|530689961|gb|EQB88084.1| CRISPR-associated protein Cas2 [Clostridium sp. BL8]	0.78	MSNKINYNYAFLFYDVNEKRVNRVFKVCKKYLSHFQKSVFRGEITPSNFILLKKDLNKVIDKNEDFVCIIKLLNGSVYGEEILGVQQNSTGEDLII
5	>gi|749562789|ref|WP_040193683.1| CRISPR-associated endonuclease Cas2 [Clostridium sp. CL-6]	0.79	MSKNINYNYAFLFYDVNEKRVNRVFKVCKKYLSHFQNSVFRGELSPSKLISLKKDLNKVIDEDEDFVCIIKLMNDNVYGEDILGNKKHDTGEDLII
6	>gi|692302163|ref|WP_032123129.1| CRISPR-associated endonuclease Cas2 [Clostridium sp. LF2]	0.77	MGEKIKYNYAFLFYDVNEKRVGRVFKVCKKYLSHFQKSVFRGEITPSNLILLKKDLNKVINKEEDFICIIKLLNEKVYGEEILGIQQNNTGEDLII
7	>gi|653616504|ref|WP_027626929.1| CRISPR-associated endonuclease Cas2 [Clostridium lundense]	0.73	MSKNLNYNYAFLFYDVNEKRVQRVFKVCKKYLSHFQKSVFRGEITPSKLISLRKDLNKVIDKSEDFVCIVKLLNDNVFGEEILGVQSNNTGEDLII
8	>gi|944177400|ref|WP_055666027.1| CRISPR-associated protein Cas2 [Clostridiaceae bacterium mt10]	0.71	MGKDMNYNYAFLFYDVKEQRVQRVFKVCKKYLSHFQKSVFRGEISPSKLILLRKDLNKVIDKDEDFICIVKLINGEVFGEEIIGNQSNNTGEDLII
9	>gi|497983370|ref|WP_010297526.1| CRISPR-associated endonuclease Cas2 [Clostridium senegalense]	0.74	MGKNINFNYAFVFYDVNEKRVQRVFKVCKKYLSHFQKSVFRGEIIPSKLIALRKDLNRVINKEEDFICIIKLMNENVFEEEILGIQLNNTGEDLII
10	>gi|618850712|gb|KAJ49986.1| CRISPR-associated Cas2 family protein [Clostridium tetanomorphum DSM 665]	0.72	MGKNLNYNYAFLFYDVNEKRVQRVFKVCKKYLSHFQKSVFRGEITPSKLISLRKDLNKVIDKSEDFVCIVKLLNDNVFGEEILGVQSNNTGEDLII
		0.772
1	>gi|923387205|gb|KOR26062.1| CRISPR-associated Cas4 family protein [Clostridium sp. L74]	0.87	MKVNGTLINYYFHCKRQCWLHGNRINLEDNSKDVKIGKAIHEVKSEKGKQTEISIDNIKIDKLTKDYLTEIKKSDSDIEAAKWQVLLYLKVLKDKGIERKGKLQFVEKNKSKNTIVIELNEKNLKELNEIVKNIENLLLGENPPEIINEPKCKKCAYFEYCYI
2	>gi|938890956|ref|WP_054675558.1| CRISPR-associated protein Cas4 [Clostridium sp. Hs50]	0.87	MKVNGTLINYYFHCKRQCWLHGNRINLEDNSKDVKIGKAIHEVKSEKGKQTEISIDNIKIDKLTKDYLTEIKKSDSDIEAAKWQVLLYLKVLKDKGGIERKGKLQFVEKNKSKNTIVIELNEKNLKELNEIVKNIENLLLGENPPEIINEPKCKKCAYFEYCYI
3	>gi|923576282|gb|KOR54623.1| CRISPR-associated protein Cas4 [Clostridium botulinum]	0.86	MKVNGTLINYYFHCKRQCWLHGNRINLEDNSKDVKIGKAIHEVKSEKSKQTEISIDNIKIDKLTKDYLTEIKKSDSDIEAAKWQVLLYLKILKDKGIERKGKLQFIEKNKSKNTIIIELNEENLKELNKIVKDIESLLLEENPPEIINEPKCKKCAYFEYCYI
4	>gi|914327504|gb|KOA19137.1| hypothetical protein CLHOM_25180 [Clostridium homopropionicum DSM 5847]	0.81	MKVNGTLINYYFHCKRQCWLHGNKINLEDNSGDVKIGKAIHEVNSEKSKQSEISIDNIKIDKLTSEYLTEIKKSDADIEAAKWQVLLYLKVLRDKGIDRKGKLDFVEKNKSKNTIIVELNDENLIELEKIITNIELLLLEENAPEVINEPKCKKCAYFEYCYI
5	>gi|530689959|gb|EQB88082.1| CRISPR-associated protein Cas4 [Clostridium sp. BL8]	0.74	MKVNGTLINYFFHCKRQCWFHGNRINLEDNSEDVKIGKAIHEEKKEKSKNSEITIDNIKIDKLTEEYLIEIKKSDADVEAAKWQLLLYLKVLKDKGIERKGKLEFVEKNKTANKVIYVEITEDNYKQLNEIIEDIEALLDREKAPEVINEAKCKKCSYYEYCYI
6	>gi|944177748|ref|WP_055666375.1| CRISPR-associated protein Cas4 [Clostridiaceae bacterium mt10]	0.73	MKVNGTLINYYFHCKRQCYLHGNRLNLEDNSEIVQIGKAIHEERQEKSDNTEISIDNIKLDKLTSEYLVEVKKSDADVEASKWQLFYYLKVLKEKGIERKGKLEFVEKNKTKNKVLYFELTEDILKELEVHVKNIENLLLEEDIPEVLNEPKCKKCAYYEYCYI
7	>gi|692302161|ref|WP_032123127.1| CRISPR-associated protein Cas4 [Clostridium sp. LF2]	0.73	MRVNGTLINYYFHCKRQCWLHGNRINLEDNSEEVKIGKAIHEVKSQNSTNSEISIENIKIDKLTKDYLVEVKKSDADVEAAKWQLLLYLKILKEKGIERTGKLEFVEKNKSKNKTLIVNLTEDNSRELDIIISKIELLLEELEAPDIINEPKCKKCAYYEYCYI
8	>gi|749562787|ref|WP_040193681.1| CRISPR-associated protein Cas4 [Clostridium sp. CL-6]	0.71	MKVNGTLINYYFHCKRQCWLHGNRLNLEDNSEIVKVGKVIHEERAERSSGTELAIDNIKLDKLTKDYLVEVKKSDADVEAAKWQLLLYLNILKEKGIERKGKLEFVEKNKGKSKILILELNQQSEDELTKVIDSIEKLLKEENVPETINKPSCKKCAYYEYCYI
9	>gi|933111443|emb|CUO38992.1| CRISPR-associated Cas4 family protein [Clostridium disporicum]	0.69	MRVNGTLINYYFHCKRQCYLHGNRLNLEDNSENVKIGKAIHEERSEKGKNTEISIDNIKLDKLTAEYLIEVKKSDADVNAATWQLMYYLKVLRSKGIERKGKLEFVEKNKGDKKIVIIELSDENEVKLDDYVMKIESLIMGDEIPEVLNKGKCKKCAYYEYCYI
10	>gi|933007168|emb|CUO10670.1| CRISPR-associated Cas4 family protein [Clostridium perfringens]	0.73	MKVNGTLINYYFHCKRQCYFHGNRFNLEDNSETVKVGKALHEEKRKGDNTELEIDNVKIDKLTKEYLTEIKKSDADVEAAKWQLLFYLKVLKAKGIERKGKLEFIEKNKTKKKTLVIELTEENEKELEGIVKNIEELILEEEIPNVINEPKCKKCAYYEYCYI
		0.774
1	>gi|914327503|gb|KOA19136.1| helicase Cas3 [Clostridium homopropionicum DSM 5847]	0.62	MYFNEVDKVDLDKLIRDGDKVYAHILNDRKETLKEHIDLALEYLHKIIKSKNLDNVFLNFENRFISNFSHKGKFLYREMLLNTIYMHDLGKINCNFQYLKMNNKEVENLIDLNLNNSNHSMLSSLIYINHYFSKINKHETKSEQSTLRLFMLLNSYIISKHHGSLDSFGEYKEKFLSDGGEGKKLYTDEISIYESLYKEEIVFNEKNQLIKRIFDNVEKTLSSKETEEKEISLDFYIYERFISSLLLSCDYYATSNFKNEREVDSLGEIKDIDKFYKVFKETDVYRWIRKYEEESYGKVEDFKDVRDINILRNEMFLDAERNFLKNIDKNIFYLEAPTGSGKSNVSLNLSFRMIEKCDAINKIFYVYPFNNLVEQNISTLEKTFGNSQVIDDIAIINSV…
2	>gi|699763015|gb|KGN02066.1| CRISPR-associated protein Cas3 [Clostridium novyi A str. 4570]	0.55	MYFDKSNKFNIEKYINNSDKIYAHTMDDYKKVETLKEHLERSIKYFYKLVENKNLDNIFLKFETKLCKEFSDKEKSLFREMIVNTIYMHDLGKININFQTIKMKNKYFKDKKDIECSNSNHSCLSSLIYMNYYYKKIKSDIELINKENKKKLRLFMVLNAYVISKHHTGLDKLDDFRYKFTKDKEGERLCSSELCIFEDMYNEVIEFTNNKYKILGKLFKLAEKTLEEYEKEEKNISVLFYIYVRLMLSTLLMCDYYATSEFENCSEVKGFNDIEDIHDFYDTFNSTSINKDTREYEKSEYGLKEDFSNVDDINVLRKELFLDAEKELLRNLDKNIFYLEAPTGSGKSNVAFNLTFKLIEKQKDLKKLIYVYPFNTLVEQNTRTIEKIFNNQEDILDSM…
3	>gi|692302160|ref|WP_032123126.1| CRISPR-associated helicase/endonuclease Cas3 [Clostridium sp. LF2]	0.54	MYFDNIEKFQVDKYIKNSENIYAHKTEDNSEFETLKEHLDLSGEYLYKLIKAKNLDNVLLNFQNLLFNEECEEGIELFKEMMLNVIYMHDIGKINCCFQYKKMGNDFFRNYEGLDFNYSNHSMLSSLIYINYYFRRIKDLEETTSKIKDKLRFFMIINSYVISKHHGSLDSFSEYQEKLLNDDGEGTRLYTDQLSIFNSSYDDELIFEKKPKLMKKLFQLVNSYLDKEINESNKKIYLYIYERFLTSLLLGCDYYSTSQFMNNLEINDFGQLSDINEFYDVLKKTDIYKGIRKYEKESYLKKHSFVGVKDINILRNEMFLDAEKALEKNIHSNIYYLEAPTGSGKSNVALNLSFKLIEKDNLLNKIFNVYPFNTLVEQNMANLEKVFGFDKKLFNEIAV…
4	>gi|743962003|dbj|BAQ13941.1| putative CRISPR-associated protein Cas3 [Clostridium botulinum]	0.53	MYFLDVEKFPIDKFVKNHSNIYAHKSEDNSRFEILEKHLELSEEYLYKVIKAKNLDNVLMNFQNCLFEENCSEGIKIFKEMIFNIIYMHDMGKINCCFQYKKMDNELFKEHDGINFNYSNHSMLSSLIYINYYFKRIKELKNVTSDIKDKLRFFMMINSYIISRHHSHLDSFNEYKNKFLEEDGEGKRLYFEQLCIFKSSYDDDIVFEKKPKLMKKLFELTEDYLNNELISSKKKIYLYIYERFFASLLLGCDYYSTSQFMNNCKLNYFGEITDINKFYDGLKKTEIYNKIRDYEKEKYLKYDNFNDVKDINILRNEMFLDAEKMLEENIESNIYYLEAPTGSGKSTVALNLSFKLIEQDKNLNKIFNVYPFNTLVEQNIASLNKIFDYDKELLDEIAV…
5	>gi|923387204|gb|KOR26061.1| CRISPR-associated helicase Cas3 [Clostridium sp. L74]	0.54	MYFIDVEKFPIDKFIKNHSNIYAHKSEDNSRFEILKDHLELSEEYLYKIIKAKNLDNVLMSFQNYLFEENCSEGIKIFKEMIFNTIYMHDMGKINCCFQYKKMDNELFKEHEGITFNYSNHSMLSSLIYINYYFKRIKELKNVTSDIKNKLRFFMMINSYIISRHHSHLDSFNEYKNKFLEDDGEGKRLYFEQLGIFKSSYDDDIVFEKKPKLMKKLFELTEDYLNNELISSKKIYLYIYERFLASLLLGCDYYSTSQFMNNCKISYFGEINDINKFYDGLKKTDIYNKIRNYEKEKYLKYDDFSNIKDINILRNEMFLDAEKKLEENIESNIYYLEAPTGSGKSTVALNLSFKLIEQDKNLNKIFNVYPFNTLVEQNIASLNKIFDYDKELLDEIAVI…
6	>gi|658097336|gb|KEI09637.1| CRISPR-associated protein Cas3 [Clostridium sp. K25]	0.52	MYFEKTEKFNISKYIKNSEKIYAHINNKTREKETLKEHVERSLKYFYKLVYSKNLENIFLKFEEKLCREFSDEEKNLFREMIINTIYMHDLGKININFQRLKMHNKYWENHKEFEFNNSNHSCLSSLIYMDYYYKKIKSNSNLNSLESKKLLKIFMILNAYVISKHHTGLDKLEDFKVKLTEDDGEGQRLCSSELSLFEDIYNDKIKFTTNENILKNLFKNTEKNLRRYEEEETNISFVFYIYERLMLSILLMCDYYATSEFEHGDEVKGFNEIENIYDFYDEFNNTKINKDTREYEKNEYDTKRDFSNLKDINILRKELFLDAEKELLKNLDKNIFYLEAPTGSGKSNVAFNLTFRLIEKERNLKKLIYVYPFNTLVDQNIKTIEKIFNNKKDVLNNM…
7	>gi|253561035|gb|EES90489.1| crispr-associated helicase Cas3 [Clostridium botulinum D str. 1873]	0.52	MYFEKTEKFDISKYIKNSEKIYAHINNKTREKETLKEHVERSLKYFYKLVYSKNLENIFLKFEEKLCREFSDEEKNLFREMIINTIYMHDLGKININFQRLKMHNKYWENHKEFEFNNSNHSCLSSLIYMDYYYKKIKSNSNLNSLESKKLLKIFMILNAYVISKHHTGLDKLEDFKVKLTEDDGEGQRLCSSELSLFEDIYNDKIKFTTNENILKNLFKNTEKNLRRYEEEETNISFVFYIYERLMLSILLMCDYYATSEFEHGDEVKGFNEIENIYDFYDEFNNTKINKDTREYEKNEYDTKRDFSNLKDINILRKELFLDAEKELLKNLDKNIFYLEAPTGSGKSNVAFNLTFRLIEKERNLKKLIYVYPFNTLVDQNIKTIEKIFNNKKDVLNNM…
8	>gi|658102431|gb|KEI14492.1| CRISPR-associated protein Cas3 [Clostridium novyi B str. NCTC 9691]	0.51	MYFEKTEKFDISKYIKNSEKIYAHINNKTREKETLKEHVERSLKYFYKLVYSKNLENIFLKFEEKLCREFSDEEKNLFREMIINTIYMHDLGKININFQRLKMHNKYWENHKEFEFNNSNHSCLSSLIYMDYYYKKIKFNSNLNSLESKKLLKIFMILNAYVISKHHTGLDKLENFKVKLTEDDGEGQRLCSSELSLFEDIYNEKIKFTTNENILKNLFKNTEKNLRRYEEEETNISFVFYIYERLMLSILLMCDYYATSEFEHGDEVKGFNEIENIYDFYDEFNNTKINKDTREYEKNEYDTKRDFSNLKDINILRKELFLDAEKELLKNLDKNIFYLEAPTGSGKSNVAFNLTFRLIEKERNLKKLIYVYPFNTLVDQNIKTIEKIFNNKKDVLNNM…
9	>gi|699759625|gb|KGM98824.1| CRISPR-associated protein Cas3 [Clostridium haemolyticum NCTC 8350]	0.51	MYFEKTEKFDISKYIKNSEKIYAHINNKTREKETLKEHVERSLKYFYKLVYSKNLENIFLKFEEKLCREFSDEEKNLFREMIINTIYMHDLGKININFQRLKMHNKYWENHKEFEFNNSNHSCLSSLIYMDYYYKKIKFNSNLNSLESKKLLKIFMILNAYVISKHHTGLDKLEDFKVKLTEDDGEGQRLCSSELSLFEDIYNEKIKFTTNENILKNLFKNTEKNLRRYEEEETNISFVFYIYERLMLSILLMCDYYATSEFEHGDEVKGFNEIENIYDFYDEFNNTKINKDTREYEKNEYDTKRDFSNLKDINILRKELFLDAEKELLKNLDKNIFYLEAPTGSGKSNVAFNLTFRLIEKERNLKKLIYVYPFNTLVDQNIKTIEKIFNDKKDVLNNM…
10	>gi|653616501|ref|WP_027626926.1| CRISPR-associated helicase/endonuclease Cas3 [Clostridium lundense]	0.51	MYFDYCKEINICDYINNEYSIYAHTKEGKNEDLQDHITLCIKYFFKIVNEKHLNEVFEKLELEFLNDFSLEGRKLFREMILNTITLHDMGKVNPYFQKSRLNNDLNIKEAAKYNNSHHSILSSIVYIDTYFPRIKTFESEEKYLLLDFMMMNAYIISRHHGNLTSWHDFKEKFAADGEGEKLITEQYILFEKTLNKKIAIKIKTINKIFEIVEEKYIEKCRKEQLIYRYIYERLMLSILIACDFYSTSEFMEGIEINDIGIINDIDEFYDVFKEGEVYKSIRKYEEEEYGFNKDFSNIKNINILRNEMFLDAEKTLEKNIEANIFYLEAPTGSGKSNVATNLSFKLLQEDKSKNKIFYVYPFNTLVEQNINTLEEVFEKEKNILNKIAVINSIEPIKVD…
11	>gi|618850714|gb|KAJ49988.1| hypothetical protein CTM_20216 [Clostridium tetanomorphum DSM 665]	0.51	MYFDYCREINICDYINNKYSIYAHTKETKNEKLQDHINLCIKYFFKIINEKHLNEVFEKLELEFLNNFSLEGRKLFREMILNTITLHDIGKVNPYFQKSRLNNDLNIKEAEKYNNSHHSILSSIVYIDIYFPKIKTFESKEKYLLLDFMMMNAYIISRHHGNLISWHDFKEKFSLDGEGEKLIDKDGQRVLFEKTLNKKIDIKIKTINKIFEIIEEKCIERYKQEQLIYRYIYERLMLSILVACDFYSTSEFMEDVEINDIGIINDIDEFYDVFKEGQIYKLIRKYEEKEYGGNKDFSHIKDINILRNEMFLDAETTLEKNLESNIFYLEAPTGSGKSNVATNLSFKLLQEDKTKNKIFYVYPFNTLVEQNINTLEKVFEKEDNILNKIAVINSIEPIK…
		0.532727
1	>gi|914327502|gb|KOA19135.1| hypothetical protein CLHOM_25160 [Clostridium homopropionicum DSM 5847]	0.64	MDTLKFTLSGRTAFFKKPEVNTYYYFTYGNIHKVALLGILGAISGYKGYNQQEVEGTLYPEFYERLKNIKIGIVPRNEKGYISKKVQVFNNSVGYASKELGGNLIVKEQWLEEPKWDIYILIDGDIERGLANRIINKRATFIPYLGKNDHMADIIDVELIKDIKKSDIASRIDSLFIKDNFNLVPFEDDFSEEYIQPFKYEEMLPIALEENTNKYELETFIYTNSELENIKDSIVYKCNEKIIFFF
2	>gi|699763016|gb|KGN02067.1| CRISPR-associated protein Cas5 [Clostridium novyi A str. 4570]	0.59	MDVLKFQLSGETGFFKRPDVNTYLYFTYGNIHKVALLGMLGAIMGYKGYNSQCNKIYKHNTKERVYPEFYEKLKDIKIGIVPINDHGYNLKKVQTFNNSVGYASQEKGGNLIVKEQWLEKPKWEIYILIENEITEELADRLKNYRFKYIPYLGKNDHLADISFVEIINNVKKVSNTDKLNSLFISKYFSVNLDEDDDLDCDETIWKYEEDLPIALEETTNKYELERFMFTNASLDVKDSQEFNIYKCNDKNIFFF
3	>gi|530689956|gb|EQB88079.1| hypothetical protein M918_05940 [Clostridium sp. BL8]	0.55	MDVLKFTLSGRTAFFKKPDVNSYYYFTYGNIHKVALLGILGAIMGFEGYNQKAMGETYKEVYEECNTKIETGPYPEFYEKLRNIKVAIVPENEKGYIEKKIQVFNNSVGYASHEKGGNLIVKEQWLENPKWSIYLLVQGKIEEEIANRLSSFSFKYLPYLGKNDHVANIDNVEIIRTVERVENVDKIHSLYIEDYFQLNVCEEDNIFDSVDDYESIWKYEELLPVALEENTNKYEFERFIFTNSSLSTKKEALVYNCDGKFIFFF
4	>gi|692302159|ref|WP_032123125.1| type I-B CRISPR-associated protein Cas5 [Clostridium sp. LF2]	0.6	MDALKFTLKGKTAFFKKPDVNTYFYFTYGNIHKIALLGILGAILGLKGYNDQSEDHIYPEFYEKLKDIKIGIVPLNHQGYIPKKIQTFNNSVGYASKEQGGNLIVKEQWLEEPSWEIYILLKGDLENQLKDNILNYNFKFIPYLGKNDHIAIIENVELIKGVKKIDKLKKINSLAIKNYFSFIGDSLDFDEEDESEDMFKYEEMLPISLEENTNKYDLKPFIYTNLSIENSSYDLIYECNDKNIFFF
5	>gi|699754839|gb|KGM94300.1| CRISPR-associated protein Cas5 [Clostridium novyi A str. 4552]	0.58	MNVLKFQLSGETAFFKRPDVNTYLYFTYGNIHKVALLGMLGAIMGYTGYNSQCNKIYKHKTKEKVYPEFYEKLKEIKIGIVPINRHGYNLKKVQTFNNSVGYASQEKGGNLIVKEQWLEKPKWEIYILIENEITEELADRLKNYRFKYIPYLGKNDHLADISFVEIINDAKEVSNFDELDSLFISKYFSLNLDEDDDLDCDETIWKYEEDLPIALEETTNKYELERFMFTNASLDAKNNQEFSIYKCNDKNIFFF
6	>gi|923576280|gb|KOR54621.1| CRISPR-associated protein Cas5 [Clostridium botulinum]	0.58	MDVLKFNLKGRTAFFKKPDVNTYFYFTYGNIHKVALLGILGSILGLKGYNDQNEKDKYPEFYEKLKGLRIGIVPMNKEGYIPKKIQIFNNSVGYASKEQGGNLIIKEQWLENPEWEIYILLKGDIENQLKDNILDRNFKFIPYLGKNDHMANIENIEIIKDAKKINNVKKIDSLYIKDYFSFRSSKYDFDEDDDMEDSWKYEEMLPISLEENTNIYDFKSFVYTKSLVENSSYELIYECNNKNIFFF
7	>gi|699759624|gb|KGM98823.1| CRISPR-associated protein Cas5 [Clostridium haemolyticum NCTC 8350]	0.59	MEVLKFNLKGETAFFKRPDVNTYVYFTYGNIHKIALLGILGAIMGYKGYNNQCNKIYKHEKEQWIYPEFYEKLKGLKVGIVPINHHGYNLKKVQTFNNSVGYASKEQGGNLIVKEQWLEKPKWEIYILIENEITRELADRLKNYKFKYIPYLGKNDHIADIGFVEVIKNAEKIHSVDKLDGLFMKKYFTLNLDNEDEEEESIWKYEESLPISLEEVTNKYELETFLMTNAIVNIKDYDKVQIYKCNNKNIYFF
8	>gi|914462473|gb|KOA91005.1| CRISPR-associated protein Cas5 [Clostridium botulinum]	0.56	MEVLKFNLSGETAFFKRPDVNTYLYFTYGNIHKVALLGILGAIMGYKGYNNQCNKIYKHEQEQSVYPEFYEKLKGLKVGIVPINHHGYNLKKVQTFNNSVGYASQEKGGNLIVKEQWLEKPKWEIYILIENEITRELADRLKNYRFKYIPYLGKNDHIADINHVEVIKTAENIQSVDKLDGLFIGKDFTLNLDNEDEEEDILWKYEESLPVALEEVTNKYELETFLMTNAAINIKDHDKVQMYKCNDKNIYFF
9	>gi|658097337|gb|KEI09638.1| CRISPR-associated protein Cas5 [Clostridium sp. K25]	0.56	MEVLKFNLSGETAFFKRPDVNTYLYFTYGNIHKVALLGILGAIMGYKGYNNQCNKIYKHEQEQSVYPEFYEKLKGLKVGIVPINHHGYNLKKVQTFNNSVGYASQEKGGNLIVKEQWLEKPKWEIYILIENEITRELADRLKNYRFKYIPYLGKNDHIADINHVEVIKTAENIHSVDKLDGLFIGKDFTLNLDNEDEEEESIWKYEESLPISLEEVTNKYELETFLMTNAIVNIKDYDKVQIYKCNNKNIYFF
10	>gi|754916278|ref|WP_042274349.1| type I-B CRISPR-associated protein Cas5 [Clostridium dakarense]	0.58	MKALKFNLSGKTAFFKKPEVNTYLYFTYGTIHKVALMGIIGSCLGLGGYNQQNKEDDYPEFYEKLKDLKFAIVPKNEGGYINKKVQVFNNSVGYASKEEGGNLIVKEQWLENPAWDIYILLDNSDICKNIEKRFSERKFIYIPYLGKNDHVANIIDVQVIEDIKEVSDFNKLDSIFVKEEFEFIKDDGFDDFDFGDLDKEVEFKYQEKLPYKLELSTNQYILKTFIYTNMKVAKITDSKVYSVDNLNLYFI
11	>gi|938890959|ref|WP_054675561.1| type I-B CRISPR-associated protein Cas5 [Clostridium sp. Hs50]	0.57	MDVLKFNLKGRTAFFKKPEVNTFFYFTYGNIHKVALLGILGSILGLKGYNDQDEKDKYPEFYEKLKGIRIGIVPMNKEGYIPKKIQTFNNSVGYASKEQGGNLIIKEQWLEDPEWEIYILLKGDIENQLKDNILDRNFKFIPYLGKNDHITTIENIELIKDAKKIDNVKKIDSLYIKDYFSFRSSKYDFDEDDDEEDDMEDTWKYEEMLPVSLEENTNIYDLKSFIYTNSLVENSSYELIYECNNKNVFFF
		0.581818
1	>gi|914327501|gb|KOA19134.1| hypothetical protein CLHOM_25150 [Clostridium homopropionicum DSM 5847]	0.8	MNKRVYGVLGIVSRMSNWNADFTGYPKTTSSGDVFGSDKAFKYPIKKMWEQQGEKVLYIKSIKLEESKKGEVELIPRSLKERYEYIFNEEDLKKNKDSKKVLTNLFTAIDVKNFGATFAEEGNNISITGAVQIGQGFNKYDETNAEEQQILSPFRDASKKEGKKDDEEAKSSTLGTKIVSNEAHYFYPFAINPYAYNQFIDLGVTEGYTEEDYKKFKEASLVAATSYSTNSKIGCENEFALFVETEADLYLPDLSQYIDFQKGEDKSTISINCEEMLNNLEGRIKNIEIYYNSYTTIINADIRKAKKYNIFTKEEV
2	>gi|253560966|gb|EES90420.1| conserved hypothetical protein [Clostridium botulinum D str. 1873]	0.71	MMNKRIYGLLGIASRMANWNADFTGYPKTISTGEIFGSDKAFKYPIKKMWNQQGEKVLYIKSMKLEEDKNGISELTPRSLKERYEYLFENDKVSGNKEAKTDKKSKKDGKEVLTNLFKAIDVKNFGATFAEEGNNISITGAVQIGQGFNKYEESYAEEQQILSPFRDASQKKKSKNEDKEEAKASTLGTKIVSNEAHYFYPFAINPTAYDEFVELGVTDGYSEEDYKRFKEASLIAATSFNTNSKVGCENEFALFVETDEELYLPNLSQFVEFQKKDDKGVIKLTCGKLLDGLKDKIKSIEIYYNPYTTILDSDIKNAKKFNIFTKKEEV
3	>gi|846586990|gb|EGO87700.2| CRISPR-associated protein [Clostridium botulinum C str. Stockholm]	0.71	MNKRIYGLLGIASRMANWNADFTGYPKTISTGEIFGSDKAFKYPIKKMWNQQGEKVLYIKSMKLEEDKNGISELTPRSLKERYEYLFENDKVSGNKEAKTDKKSKKDGKEVLTNLFKAIDVKNFGATFAEEGNNISITGAVQIGQGFNKYEESYAEEQQILSPFRDASQKKKSKNEDKEEAKASTLGTKIVSNEAHYFYPFAINPTAYDEFVELGVTDGYSEEDYKRFKEASLIAATSFNTNSKVGCENEFALFVETDEELYLPNLSQFVEFQKKDDKGVIKLTCGKLLDGLKDKIKSIEIYYNPYTTILDSDIKNAKKFNIFTKKEEV
4	>gi|749562784|ref|WP_040193678.1| CRISPR-associated protein [Clostridium sp. CL-6]	0.72	MDKRVYGVIGIVSKMANWNADFTGYPKTTSDGSTFGSDKALKYPMKKMWENKGDKVLYIKSLKLSEGKKGEVTVVPRSLKERYQYIFGVKDLKQCKDTSEVLKNLFNAVDVKNFGATFAEEGNNISITGAVQIGQGFNKYDGTNPEEQQILSPFRDGSKDNADSEEAKNSTLGTKIVSNEAHYFYPFTINPLAYKEFKELSVTDGYTEEDYNKFKEAALVSATSFATNAKAGCENEFAIFVETDSDLYLPTLSEYIEFEKGEDKNIIKIQCSELLNSLKDRIKNVEIYFNPYTTKVESNIEGAKEYNIFTQKEV
5	>gi|530689955|gb|EQB88078.1| hypothetical protein M918_05935 [Clostridium sp. BL8]	0.72	MDKRVFGVLGIVSRMSNWNADFTGYPKTTSDGEVFGSDKAFKFPMKKMWQQQGEKVLYIKSMKLQEGKKGETDLIPRSLKERYEFIFNEEDLKKNKDSKKLLTNLFMAIDVKNFGATFAEEGNNISITGAVQIGQGFNKYEGTSAEEQQILSPFRDASDKGKGNDKKKDEEGGEAKSSTLGTKIVSNEAHYFYPFAINPHSYDEYKSFGVTEGYTEEDYSKFKKAATIAATSYSTNSKIGCENEFALFVETKDDLYLPDLTQYIHFQKGEEKSSIIIKCDELINKVSEKIEAIEVYYNPYTTVIEKNLNKAKYFNIFTKEEV
6	>gi|653616499|ref|WP_027626924.1| CRISPR-associated protein [Clostridium lundense]	0.71	MNKRIYGIIGIVSIMANWNADFTGYPKTISTGEIFGSDKALKYPMKKMWSNEGEKVLYIKSMKLSEGKNGAVDLVPRSLKERYEYLFNEADLKKAKDSKKLLTNLFSAIDVKNFGATFAEEGNNISITGAVQIGQGFNKYEDSYAEEQQILSPFRDASDKGKEKDNQEEAKNSTLGTKIVSNEAHYFYPFTINPSVYNEFVGLGVTDGYTEEDYKKFKEAALSSATSFATNAKVGCENEFALFVETKSNTYLPTLSEYVKFEKGDDKNIITLSCGDLLNSLKDSIVSVEIYYNPYTTIINEEIEGVKKYNIFTKQEV
7	>gi|658101678|gb|KEI13763.1| CRISPR-associated protein [Clostridium novyi B str. ATCC 27606]	0.69	MNKRIYGLLGIASIMANWNADFTGYPKTISTGEIFGSDKAFKYPIKKMWNQQGEKVLYIKSMKLEEDKNGISDLTPRSLKERYEYLFENDKVSGNKEAKTDKKSKKDGKEVLTNLFKAIDVKNFGATFAEEGNNISITGAVQIGQGFNKYENSYAEEQQILSPFRDASQKKKSKNENEDKEEAKASTLGTKIVSNEAHYFYPFSINPTAYDEFVELGVTDGYSEEDYKRFKEASLIAATSFNTNSKVGCENEFALFVETDEELYLPNLSQFVEFQKKDDKGVIKLTCGKLLDGLKDKIKSIEIYYNPYTTILDSDIKDAKKFNIFTKKEEV
8	>gi|237658696|gb|EEP56248.1| conserved hypothetical protein [Clostridium butyricum E4 str. BoNT E BL5262]	0.71	MDKRVYGVLGISSIMANWNADFTGYPKTTSDGTTFGSDKALKYPMKKMWDNQGEKVLYIKSMKLSEGKKGEVQLVPRALKERYEQIFDVKNLKECKDAKEVLTNLFNAIDVKNFGATFAEEGNNISITGAVQIGQGFNKYEDTNPEEQQILSPFRDGSKDNAKPDSEEAKNSTLGTKIVSNEAHYFYPFTINPAAYKEFNELGVTDGYTEEDYGKFKKASLVSATSFATNSKVGCENEFALFIETDSDLYLPNLSEYIEFVKGDEKNTIKINCSELINSVISKIKNVEIYFNPYKTVLESDIKGAKVFNIFTQEEV
9	>gi|692302158|ref|WP_032123124.1| CRISPR-associated protein [Clostridium sp. LF2]	0.74	MNSRVYGVLGIVSRMSNWNADFTGYPKTTSSGEVFGSDKAFKYPMKKMWDEQGKKVLYIKSMRLQEGKKGEVELIPRSLKERYEHIFQGEDLKNTKDSKKVLENLFSAIDVKNFGATFAEEGNNISITGAVQIGQGFNKYSDTNADEQQILSPFRDSKKKKEDDDEAKSSTLGTKIVSDEAHYFYPFTINPQAYDGFKELEVTEGYTEEDYKNFKEASMVAATSFSTNAKIGCENEFAMFVETDRDLYLPDLSQHVVFEKCDDKGNIIIKCNSLFKDLKERIKSIEIYYNPYTTIIKKDIENAKYFNIFTKEEV
10	>gi|566225935|gb|ETI90105.1| hypothetical protein Q607_CBUC00062G0008 [Clostridium butyricum DORA_1]	0.71	MDKRVYGVLGISSIMANWNADFTGYPKTTSDGTTFGSDKALKYPMKKMWDNQGEKVLYIKSMKLSEGKKGEVQLVPRALKERYEQIFHVKNLKECKDAKEVLTNLFNAIDVKNFGATFAEEGNNISITGAVQIGQGFNKYEDTNPEEQQILSPFRDGSKDNAKPDSEEAKNSTLGTKIVSNEAHYFYPFTINPAAYKEFNELGVTDGYTEEDYTKFKKASLVSATSFATNSKVGCENEFALFIETDSDLYLPNLSEYIEFVKGDEKNTIKITCSELINSVISKIKNVEIYFNPYKTVLESDIKGAKVFNIFTQEEV
		0.722
1	>gi|914327499|gb|KOA19132.1| CRISPR associated protein Cas6 [Clostridium homopropionicum DSM 5847]	0.69	MKVYELTLKVFLLKTIGSTETLQKISELIDKSLSRDKKFLEFHTNSGFKNYTFNSLFPVEKSKIYNEGKIYSIKVRTIDEELAEYFKKNLVNEYTDFIKALTIEYKIIKPGYIDRIYSITPVVIKTEEGYWKGNLSLDEFEKRIKENLIKKYNKYFNTKLDEDFQLFNMINFDNIKPISSKYKSVNILGDKLTLTIAENKTAQDLACLALGAGIGEMGSRGFGFVNYKQL
2	>gi|923387200|gb|KOR26057.1| CRISPR-associated Cas5e family protein [Clostridium sp. L74]	0.61	MRVYELTLKIFLLKDLTMDKSYEKLTELIDKSLCKDDELLELHNQNKYKYYTFSLPYKLEKDKIYKAGNIYSVKIRTIDEKILKNFKTQLVNIYTEYIKALTMEVKVIPQKYISTIYSLTPVVIKTDRGYWKGNLSLNEYEKRIKENLIKKYNQFFDEKINEDFPLYDFIRFDNRKPIGIRYKNITLLGDKITLNIANDEVSQKIAYLAVGAGLGEMGSRGMGFVNYKWM
3	>gi|923576277|gb|KOR54618.1| CRISPR-associated protein Cas6 [Clostridium botulinum]	0.6	MEVYELTLKIFLLKDLTVDKSYEKLTELIDKSLCKDDELLALHNENKYKYYTFSLPYKLEKDKVYKAGNIYSVKIRTIDEKILKNFKTQLVNVYTSFMKALTIDVKVIPQKYISTIYSLTPVVIKTDKGYWKGNLSLNEYEKRIKENLIKKYNQFFDEKINEDFPLYDFIRFDNRKPIGIKFKNITLLGDKITLNIANDEVSQKIAYLALGAGIGEMGSRGMGFVNYKWM
4	>gi|692302155|ref|WP_032123121.1| CRISPR-associated endoribonuclease Cas6 [Clostridium sp. LF2]	0.59	MKVYELTLKIFLIKDLPLDQAYEELSELIDKSLCKDTELLALHNENRYKYYTFSLPYKLEEDKIYKAGNIYSVKIRTIDEKILINFKTQLVNMYTSIIKALTVEIKVIPKKHISTLYSITPIIIKTDKGYWKGNLSLDQYEKRIKENLIKKYNQFFDEKIDENFPLYNFIRFDNKKPIGIKYKNITLLGDKITLNIADDEISQNIAYLALGAGLGEMCPRGMGFLNYKWM
5	>gi|749562781|ref|WP_040193676.1| CRISPR-associated endoribonuclease Cas6 [Clostridium sp. CL-6]	0.56	MKVFELNLKVFLLKNISIEDSQEKIAEFIDLALGKSEEFLSFHNENEFKNYCFNSFYPLEEDGIYKADKVYTINLRTIDKELANYFNANLANEHNNYIKGLICEIRILPKKPIEKLYSITPLIIKTDKGYWKNSLSIDEFERRIKENLIKKYNQYNNVKISEDFELYTTILMKNRKPIATTYKGRRILGDKLSIVISSDEIAQELAYMALGTGVGEMNPRGLGFVNYRWL
6	>gi|618850718|gb|KAJ49992.1| hypothetical protein CTM_20236 [Clostridium tetanomorphum DSM 665]	0.54	MKVFEISISVFLIKDIDSKDSFEKIAQFIDSGLAKKTELLELHNSNTYKNYCFCSFYPIQQDRVYKCGNIYTIRIRTIDHKLAKFFNEELVNHYNQDIKALTSTIRILPRKYIDKIYSITPLILKTNEGYWKNNISLSEFERRLKENMVKKYNLFMNTKIDEDFQLYTSIEFKNKKPVAINYKGKTILGDKLTIHISDDRMAQELAYMSLGTGALEMNARGAGYMNAKWL
7	>gi|665905275|ref|WP_031271448.1| CRISPR-associated endoribonuclease Cas6 [Clostridium sp. BL8]	0.52	MNVLELNLKVYVLKNIRSNEALAKIAELIDKSLARESDFLEFHNKNMFKGYCFNSLFPLEDNGVYKNGRVYNIKIRTINRELAQHFKKYLCDEKTECLKSLTIEEKTLPQKHIEKIYSITPCVIKTDMGYWRGNLSLADYENRIKSNLIKKYNQFLQTELEEKFPVYNFISFDNKKPVSTVVKNVELLGDKVTLVISDDEESQKLAYLALGTGIGESNSRGFGFVNFRCL
8	>gi|928941204|ref|WP_053966023.1| CRISPR-associated protein Cas6 [Clostridiales bacterium mt11]	0.58	MKVIELELKVFLMRNIMSSEALEGISKLIDKSLLKTQKYADFHKENKYKYYNFSSLWPLEVDKIYKKGNIYSIKIRTVYEELSEHFEEYLVNEYTDSMKALTINKRYLPKKHIEKLYNITPSVAKFEDGYWRKNQSLETYERRIKDNIIKKYNDFFNKKIDEDFELFNMIKFENIKPISTKYKNISLLGDKMTLYIAENEMAQEMAYFILGTGLLEMGSRGFGYCNYKWI
9	>gi|653616497|ref|WP_027626922.1| CRISPR-associated endoribonuclease Cas6 [Clostridium lundense]	0.55	MKVFEISISVFLIKDIDSEDSFEKIAQFIDSGLAKKTELLELHNSNTYKNYCFCSFYPLEEDKVYKRGNIYTIKIRTVDYELAKFFNEELVNHYNHDIKALTSTIRILPRKYIDKIYSITPLILKTNEGYWKNNISLDEFERRLKENLVKKYNLFMNTKIDENFQLYTSIEFKNIKPIGINYKGKKILGDKLTIHVSNDTMAQELAYMSLGTGALEMNARGAGYMNVKWL
10	>gi|530689953|gb|EQB88076.1| hypothetical protein M918_05925 [Clostridium sp. BL8]	0.51	MKDLNVLELNLKVYVLKNIRSNEALAKIAELIDKSLARESDFLEFHNKNMFKGYCFNSLFPLEDNGVYKNGRVYNIKIRTINRELAQHFKKYLCDEKTECLKSLTIEEKTLPQKHIEKIYSITPCVIKTDMGYWRGNLSLADYENRIKSNLIKKYNQFLQTELEEKFPVYNFISFDNKKPVSTVVKNVELLGDKVTLVISDDEESQKLAYLALGTGIGESNSRGFGFVNFRCL
11	>gi|516436371|ref|WP_017825308.1| CRISPR-associated endoribonuclease Cas6 [Clostridium botulinum]	0.56	MNVFQIKLKVFLLEDINLENLQSKLTAFIDKSLAKDSDLLKFHQSNKFKYYCFDSLYPIEKDKVYKKNNIYTLTIRTIDKVLANFFNSILVNEFNNYMKALTSEIRIIPKKHINKIYSITPAILKNDDGYWKYKMSLDEFERRLKENLIKKYNSITDTKIDEEFDLYTTIEIKNKKPISTAYKKIKLLGDKISLNIAENEIAQDLAYMSIGTGILENNARGFGFMNYRWL
		0.573636
1	>gi|743962006|dbj|BAQ13944.1| putative CRISPR-associated protein Cas8 [Clostridium botulinum]	0.62	MLKDAIDTFKNIYKKKGESYITDSYIPADGDYVIVEPYGNTFRELDIVKIKQDKKTKEIDRSSEYFKFICNADYLSKLIDMNKPIDGKKIIHSNNYLSFFVKKENVNNGKLNDVVIDSYYEILKIPEIKYSKEKLRLYKEIEDKHGKVNEDLIENIKMWIKDNIKNYANEDSKDKSYLKIFFKYDIEEYKKENEKYLIPNIFNSVEFNVKIGEETYGLPNDNMGLNSKKPYLENKSRKTKVPYLISLEEVLLQKKFFDYLLNQVSIGKTNIYIDKKGIYPKNDKESMGNDFSGIYFRIKKGKEVEIHDFDTINHYKANINPIKLKNVINIDLNKSDLTYNINITKISTIKDLINKVFFSKFLSSNYFTESKDMNINDNNLKRNILLSRRTLFNWFYKGN…
2	>gi|914327500|gb|KOA19133.1| hypothetical protein CLHOM_25140 [Clostridium homopropionicum DSM 5847]	0.6	MLSDVIKTFEKIYRDIGETCITDSYVPADGEYIIVDVSGEEFKELDRIDIKQDKKTKKIDTTNYHFSFIRQADYMSKLIDMNKPIDGKKVIHSNNYFTFFVKKENINNGKLNNTVIEEYYSILKNPLLKYTESKSKSRKLYLELEGKNGKPNQTRIEKIQKWIVDNIHDLVPKDNKDKTYLKIFFKYDLEEYRKESEKYILTNIYNSNDFNISIDNQIYGLPNDNMGLNAKKPYLENKTRKTKVPFLLSQDEVLMQKKFFDYLMNQVSIGKTNIYINEDEIKAFSNDEMLDEDFSGYYLRAKKGKEVEIHDFDTIVIYKPNINPINIVNALQIEKAKITYGKVYNLKDLKNIINEVFFSKFLTSNYFTEAKDLNINDSSLKKNILLARTTLFNWFYKGN…
3	>gi|692302157|ref|WP_032123123.1| type I-B CRISPR-associated protein Cas8b/Csh1 [Clostridium sp. LF2]	0.61	MLQDAIKTFKNIYDKNGENFITNSYIPSDGDYVILAPHEDTFKELDVVKIKQNKKTKEIDRSSEYFDFICNADYLSKLIDMNKPIDGNKIIHSNNYFSFFVKKDNVNNGKLNDELIESYYEILKNPEIKYSKDKEKLRLYKEIEDKYGKVDSVLIENIKSWIKENIKNYVDENSTDKSYLKFFFKYDLEEYKKENEKYLIPNIFNSVDFNVKISEKTYGLPNDNMGLNSKKPYLENKSRKTKVPYLTSLDEVLLQKKFFDYLLNQVSMGKTNIYIDNEQIKALSDEESMSNDFNGIYLRIKKGKEVEIHDFDTISNYKANIKPIILKNVVDVDLNKSELNYNVKINTLDGTKKLINQVLFSKFLTSNYFTDSKDMRINDNNLKRNLLLSRGSLFNWFYK…
4	>gi|923576278|gb|KOR54619.1| CRISPR-associated protein Csh1 [Clostridium botulinum]	0.61	MLKDAIYTFKNIYEKKGESFITDSYVPEDGDYIIVEPYENTFRELDIVKIKQDKKTKEIDRSSEYFKFICNADYLSKLIDIQKPIDSKKIIHSNNYLSFFVKNENVNNGKLNNKIIDSYYEILKNPEIKYSKEKLRLYKEIEDKYGKVNENLIENIKIWIKDNIKDYVHEDSKGNSYLKIFFKYDLEEYKKENEKYLIPNIFNKVDNFNIKIGEETYGLPNDNMGLNSKKPYLENKSRKTKVPYLISLEEVLLQKKFFDYLLNQVSIGKTNIYMDKKEIYPKSDKESMDNDFSGIYFRIKKGKEVEIHDFDTINHYKANIKPIKLKNVIDIDLNKSNITYNITITKRNTIKDLINKVFFSKFLSSNYFTESKDMNINDNNLKRNILLSRRALFNWFYKG…
5	>gi|923387201|gb|KOR26058.1| CRISPR-associated protein Cas8b/Csh1, subtypeI-B/HMARI [Clostridium sp. L74]	0.61	MLKDAIDTFKSIYEKKGESFITDSYVPEDGDYIIIEPYGNTFRELDIVKIKKDKKTKKIDRSSSEYFKFICNADYLSKLIDIQKPIDSKKIIHSNNYLSFFVKNENVNNGKLNDEVIDSYYEILKNPEIKYSKEKLRLYKEIEDKYGKVNENLIENLKIWIKDNIKDYVHEDSKGNSYLKIFFKYDIEEYKKENEKYLIPNIFNKVDNFNIKIGEETYGLPNDNMGLNSKKPYLENKSRKTKVPYLISLEEVLLQKKFFDYLLNQVSIGKTNIYIDKENIYPRSDKESMDNDFSGIYFRIKKGKEVEIHDFDTINNYKANIKPIKLKNVIDIDLNKSNITYNVTITKRNNIKDLINKVFFSKFLSSNYFTESKDMNINDNSLKRNILLSRRALFNWFYK…
6	>gi|530689954|gb|EQB88077.1| hypothetical protein M918_05930 [Clostridium sp. BL8]	0.54	MLQDAIETFKKKYEIYEDNLIIDDYIPVDGEYIIVGEEGDSFKILDKVHIKQDKKTKQVDTSGDYYGFICQADYMSKYLESNKAIKDKNIFSNNYFTFFVKKENIANRKISKEVIDGYYDILKNPTLKYSKSKSRAMYEEMEKRYGAVDEVRLEKIRAWIKENLYSFVNDKSNDKTQLKIFFKYDLREYKKESQKYFIPNIFNSTDYNEIINGSIYGLPNDNMGLNTKKPYLENKTRKVTVPYLLSLDEVIIQRKFFDYLSNQLSKGKQNIYIDDKQILSFSNDEMLEDEFTGIYMRLQKGKEVEIHDFDNVVNYQHRIRTINLDNILDTDTKHLKVRYGSINTLKEVKNIVNEIFFSGYLVNNYFTDPKDISLIDNNLKRNLLLARGALFNWFYKGSN…
7	>gi|914462472|gb|KOA91004.1| CRISPR-associated protein Csh1 [Clostridium botulinum]	0.54	MLNQAIKYLVSNYKEDEIDKFIAKNYIPADGRYIVVEETKDGFNKIEEMQIKQNKKTKQLEDTTGFINFDFACQADCLSKLIDMNKPIDSKKVIHSNNYLSFFVKADSISSGKLTNEIIHNYYEVLRNPQDKYKKDKKKLTMYEDAEKEFGKVNEERLNKIEEWIINNIYDSVPKDSKEKTYLKIFFKYDLSEYEKESKKYLIPNIYNSTDFNVSIKDTLYGLPNDNMGLNSKKPYLENKTRKTTVPFLISLKQVLLQKKLFDFLMNMASTGRVNVYLNEKEIIALSNKESIKKDFQGVYIRIKKGKELEILDFDIIEDYKVKLNKPIKIKNVLQINYEKLSKKLPDYYHEIKLVENLKILINEILFSKFLDSNYFTEAKDLSINNSNLKMNLLLSRNI…
8	>gi|699754840|gb|KGM94301.1| CRISPR-associated protein Csh1 [Clostridium novyi A str. 4552]	0.54	MLKQAVDYLLSNYSEDKIDKFIAKNYIPDDGEYIILKETEDGFSELERVEIKKDSKTKEIDTTGFMNFDFMSIADYLSKLIDMNKPIDSKKVIHSNNYLTFFIKKDSVSSGKLNNEIIHNYYKVLRNPSSKYSKSKEKLKMYEEAEKELGKVNEKRLDKIEQWIVNNVYDLVPKDSKEKTYLKIFFKYDLSEYEKESKKYLIPNIYNNTDWNSYIEDTLYGLPNNNMGLNSKKPYLENKTRKTTIPFLISLKEVLLQKKLFDFLMNMANKRKVNIYINKEKIIALNNNESLNEDFQGIYMRIKKGKELEILDFDVIEDYKVRLREPIKIQNVLKINYDKLDRNPQDMYKQINLVESLKSLVNEILFSKFLNTNYFTEPKDLSINNSNLKMNLLLSRDVL…
9	>gi|699760984|gb|KGN00110.1| CRISPR-associated protein Csh1 [Clostridium botulinum C/D str. DC5]	0.53	MLNQAIKYLVSNYKEDEIDKFIAKNYIPADGRYIVVEETKDGFNRVEEMQIKQNKKTKQLEDTTGFINFDFACQADCLSKLIDMNKPIDSKKVIHSNNYLSFFVKADSISSGKLTNEIIHNYYEVLRNPQDKYKKDKKKLTMYEDAEKEFGKVNEERLNKIEEWIINNIYDSVPKDSKEKTYLKIFFKYDLSEYEKESKKYLIPNIYNSTDFNVSIKDTLYGLPNDNMGLNSKKPYLENKTRKTTVPFLISLKQVLLQKKLFDFLMNMASTGRVNVYLNEKEIIALSNKESIKKDFQGVYIRIKKGKELQILDFDIIEDYKVKLNKPIKIKNVLQINYEKLSKKLPDYYHEINLVENLKILINEILFSKFLDSNYFTEAKDLSINNSNLKMNLLLSRNI…
10	>gi|658097339|gb|KEI09640.1| CRISPR-associated protein Csh1 [Clostridium sp. K25]	0.51	MLNQAIKYLVSNYKEDEIDEFIIKNYIPADGRYIVVEETKDGFNKIEEMQIKQNKKTKQLEDTTGFVNFDFVCKADYLSAVKDTNKSVEKKKVIHSNNYLSFFVKADSISGGKLTNEIIHKYYEVFRNPQDKYKKDKNKLAMYKDVEKEFEKVNEERLNKIEEWVINNIYDLVLKDSKEKTYLKIFFKYDLYEYEKESKKYLIPNIYNSTDFNISINDTLYGLPNDNISFNSKKNYLGNKTRKIRAPFLISLKEALMQKKLFDCLINMASTGRVNVYLNEKEIIALSNKESIKKDFQGVYIRIKKGKELQILDFDIIEDYKVKLNKPIKIKNVLQINYEKLSKKLPDYYHEIKLVENLKILINEILFSKFLDSNYFTEAKDLSINNSNLKMNLLLSRNI…
11	>gi|749562782|ref|WP_040193677.1| type I-B CRISPR-associated protein Cas8b/Csh1 [Clostridium sp. CL-6]	0.51	MIKECLESFEKEIGIKGDKLILDNYIPADGTYIIVAPMGDSFQIVDTLNIKLDKKTKTIDRSSNYFDSICMYDYNSKLVDMNKPIDGKKIIHSNNYLSFFAKKESFINGKLTDEVIDGYYAILADPYLKYPKSKSKSHEVYMALEEEIGTVNIELLEKIRCWIKENVYEIGKQHTGKDYLKIFFQYDEQDYIREGKRYFIPNIYNSNDYNVKVIDGILGLPNDNMGMNAKKPYLENKTRKITSPYLINSEEVMLQKKFFDYLLNEVTLGKVNVYINDEGIKVYPNGQLPDKDFEGLYLRLKKGKEVEIRGYDVITMYKPNLARSFSFNNVLKDTLDEKSGELYGKYKKRSDIQGIIDNVFFSKYLVNNYFTDPGDISITNNVLKNNLLLGREGIFNWLY…
		0.565455
1	>gi|757420241|gb|KIS24013.1| AAA-ATPase [Clostridium botulinum B2 450]	0.89	MQKRFNVTGTCIPEKHYMVDISNKLDSILKLVNNEEYFIINRPRQYGKTTTLYLLEKRLNRMEEYLPIKISFEAIDTEGYSEVKKFLSSIMMQIVNYFRFSTNKEMYKFIKNHENKITTMNEFNSFITDLIEFAEKKVVLIIDEVDKSSNNQLFLDFLGMLRSKYLLRNEGRDYTFHSVILAGVHDIKTLKLKIRADEEHKYNSPWNIASDFDVEMSFSIDEIKTMLDDYVENKAVDLDKEYFAEKLYFYTSGYPFLVSKLCKIIDEKIMDQNELKWEKEYLELAVKELLNESNTNFDSLIKNIENNKELSELVDNLLIKGIQLNFNIHNPDINLGYLYGIFRNEKGNLKINNRIYEQLIYDYRISKIQTSSNFVNYNSKENFIDSNGDLNIKKVLLKF…
2	>gi|187772909|gb|EDU36711.1| hypothetical protein CLOSPO_02880 [Clostridium sporogenes ATCC 15579]	0.88	MQKRFNVTGTCIPEKHYMVDISNKLDSILKLVNNEEYFIINRPRQYGKTTTLYMLEKRLNRMEEYLPIKISFEAIDTEGYSEVKKFLSSIMMQIVNYFRFSTNKEIYKFVKNHENKITTMNEFNSFITDLIEFAEKKVVLIIDEVDKSSNNQLFLDFLGMLRSKYLLRNEGRDYTFHSVILAGVHDIKTLKLKIRSNEEHKYNSPWNIASDFDVEMSFSIEEIKTMLDDYVENKKVDLDKEYFSEKLYFYTSGYPFLVSKLCKIIDEKIMDQNELKWEKEYLELAVKELLNESNTNFDSLIKNIENNKELSELVDNLLIKGIQLNFNIHNPDINLGYLYGIFRNEKGNLKINNRIYEQLIYNYRISKIQTSSNFVNYNSKENFIDSNGDLNIKKVLLKF…
3	>gi|827566529|gb|AKJ90078.1| AAA-ATPase [Clostridium sporogenes]	0.88	MQKRFNVTGTCIPEKHYMVDISNKLDSILKLINNEEYFIINRPRQYGKTTTLYLLEKRLNRMEEYLPIKISFEAIDTEGYSEVKKFLSSIMMQIVNYFRFSTNKEIYKFVKNHEDKITTMNEFNSFITDLIEFAQKKVVLIIDEVDKSSNNQLFLDFLGMLRSKYLLRNEGRDYTFHSVILAGVHDIKTLKLKIRADEEHKYNSPWNIASDFDVEMSFSISEIKTMLDDYVENKAVDLDKEYFAEKLYFYTSGYPFLVSKLCKIIDEKIMDENELKWEKEYLELAVKELLNESNTNFDSLIKNIENNKELSELVDNLLIKGIQLNFNIHNPDINLGYLYGIFRNEKGNLKINNRIYEQLIYNYRISKIQTSSNFVNYNSKENFIDSNGDLNIKKVLLKF…
4	>gi|953122908|gb|KRU44978.1| 9-O-acetyl-N-acetylneuraminate esterase [Clostridium sporogenes]	0.84	MKKRFNVTGTCIPEKHYMVDISNKLDSILKLVNNEEYFIINRPRQYGKTTTLYMLEKRLNSMEEYLPIKISFEAIDTEGYSEVRKFLSSIMMQIVNYFRFSTNKEMYKFIKNHENKITTMNEFNSFITDLVEFAEKKVVLIIDEVDKSSNNQFFLDFLGMLRSKYLLRNEGRDYTFHSVILAGVHDVKQASKISDFDMIAYSCEEMSRSFLTKELKIRPDEEHKYNSPWNIASDFDVDMSFSVSEIKTMLDDYVENKAVDLDKEYFAEKLYFYTSGYPFLVSKLCKIIDEKIMDENGLKWEKEYLELAVKELLNESNTNFDSLIKNIENNKELSQVVDNLLIKGVRLNFNIHNPDINLGYLYGIFKDDKGNLKINNRIYEQLIYNYRISKIQTSSNFYN…
5	>gi|658414569|gb|KEI99975.1| hypothetical protein N496_10580 [Clostridium botulinum A2B3 87]	0.84	MKKRFNVTGTCIPEKHYMVDISKKLDSILKLIDNEEYFIINRPRQYGKTTTLYMLEKRLNKMEEYLPIKISFEAIDTEGYSEAKKFLSSIMMQIINYFRFSTKKEIYKFVKRHENKVNTMNEFNRFITDLIEFTEKKVVLIIDEVDKSSNNQLFLDFLGMLRSKYLLRSEGKDYTFHSVILAGVHDVKTLKLKIRSDEEHKYNSPWNIASDFDVDMSFSRSEIKTMLDDYVENKKVALDKEYFAEKLYFYTSGYPFLVSKLCKIIDEKIMDENKLEWKKEYLEIAVKELLKDSNTNFDSLIKNIENNEGLSQLVDNLLIKGVRINFNIHNPDINLGCLYGIFKDDKGNLKINNRIYEQLIYDYRISKIQTSSNFYNYNSKENFIDTNGDLNIRKVLLKF…
6	>gi|923387186|gb|KOR26043.1| DNA-dirted RNA polymerase [Clostridium sp. L74]	0.81	MKKRFNVTGTCIPEKHYMVDISNKIDRILKLVNNEEYFIINRPRQYGKTTTLYMLEKRLNSMEEYLPIKISFEAIDTEGYSKVRKFLSSIIMQIVNYFRFSTNKEMYKFIKDHENKITTMNEFNSFITDLVEFAEKKVVLIIDEVDKSSNNQLFLDFLGMLRSKYLLRNEGRDYTFHSVILAGVHDIKTLKLKIRSDEEHKYNSPWNIASDFDVDMSFSISEIKTMLDDYVESTDVDLDKEYFAEKLYFYTSGYPFLVSKLCKIIDEKIMDENELRWEKEYLELAVKELLNESNTNFDSLIKNIENNKDLQELVRKLILDGYKISYNQDNPIITKGIIYGIFKNSNGKVKIHNRIYEQRIYNYMVSLIETKMNLGFYNEKGKYLNKDGTLNIKKILVSF…
7	>gi|152937230|gb|ABS42728.1| conserved hypothetical protein [Clostridium botulinum F str. Langeland]	0.79	MVDISKKLDSILKLIDNEEYFIINRPRQYGKTTTLYMLEKRLNKMEEYLPIKISFEAIDTEGYSEAKKFLSSIMMQIINYFRFSTKKEIYKFVKRHENKVNTMNEFNRFITDLIEFTEKKVVLIIDEVDKSSNNQLFLDFLGMLRSKYLLRNEGKDYTFHSVILARVHDVKQASKIYDFDMIAYSCEEMSRRFLTKDLKIRSDEEHKYNSPWNIASDFDVDMSFSRSEIKTMLDYYVKNKKVALDKEYFAEKLYFYISGYPFLVSKLCKIIDEKTMDENKLEWKKEYLEIAVKELLKDSNTNFDSLIKNIENNEGLSRLVDNLLIKGVRINFNIHNPDINLGCLYGIFKDDKGNLKINNRIYEQLIYDYRISKIQTSSNFYNYNSKENFIDTYGDLNIR…
8	>gi|219568882|dbj|BAH06866.1| hypothetical protein [Clostridium kluyveri NBRC 12016]	0.68	MQELKKYMAEYTDKVGNRYKWGVKVMEKEFNVTGTCIPEMHYMVDISNKLDKVFRLIEKGKYFVINRPRQYGKTTTLFLLNRELKKDNNYLPIKISFEAIDSETYNEMKSFLKSVMTQIINYFKFSKEKNMVEFIRKYNNKVNKMDEFSEFITDLVEYAEKKVVFIIDEVDKSSNNQLFLDFLGMLRNKYLLRNEGMDITFHSVILAGVHDVKSLKIKIRPDEEHKYNSPWNIASDFDVDMSFSKEEIGTMLDDYVKNKGVVLDKEYFSERLHFYTSGYPFLVSKLCKIMDEKIMSEGDLKWKKEYMDMAVKKLLNDDNTNFQSLIKNIENNRELYDFVRNIVLDGEDITYVKSDEIVNLGTLYGILKEENGNCKINNKIYEQLIYNHMMMKVIRNNEY…
9	>gi|953086893|gb|KRU12143.1| AAA-ATPase-like protein [Clostridium pasteurianum DSM 525 = ATCC 6013]	0.66	MEKRFNVTGTCIPEKHYMVDISEKLKDIMKLIENEEYFIINRPRQYGKTTTLYMIERALDKNNDYLTISISFEGVGDLIFEEEQRFTRGFLNLVERSLLLEHEELSKFIEEQKLKVETMDDLSYSITKFIIEVNKKIILMIDEVDKSSNNQLFLSFLGMLRNKYLLRNSGKDKTFHSIILAGVHDVKILKVKIRPDEEHKYNSPWNIASDFDIDMSFSKEEIGTMLDEYIKNEGVKLDKEYFSEKIYFYTSGYPFLVSKLCKIIDEKIMDIKQLKWDKEYMDRAVKELLKDSNTNFDSLIKNVENNIALKELIKKITVDGSEITYNKDNPTINLGVIYGIFKDEQGKLKLHNRIYEQKIYDYMSSLIETSTNLSFYNERSEFIKKDGSLDIAKVLLKFQ…
10	>gi|451783389|gb|AGF54357.1| putative AAA-ATPase [Clostridium saccharoperbutylacetonicum N1-4(HMT)]	0.67	MRKKFNVTGTCIPNKHYMVNTSNKMKKIIRLIEDEEYFIINRPRQYGKTTTLYLLEKLLNEDSEYLVISISFEGIGDLIFEEEKRFSKGFLNLIERTLFMGNEEISEFVKNEKNDVETMDDLSHFLTKFILKCNRKVILMIDEVDKSSNNQLFLSFLGMLRNKYLLRNTGKDYTFYSVILAGVHDVKSLKLKIRPEEESKYNSPWNIASDFNVDMSFSEEEIGTMLDDYTENKGVVLDKAYFAERLYFYTSGYPFLVSKLCKIIDEKIMAEEELKWEKDYMELAVKEILKESNTNFDSLIKNIENNNDLKVLVKRIILDGTDITYNQDNLIINMAIMYGIFKNNNGKVNIHNRIYEQRIYNYMSSLIETSTEVGAYNQSAKFIKVNGDLDIEKILVKFQ…
11	>gi|848263503|gb|AKN33931.1| AAA-ATPase [Clostridium carboxidivorans P7]	0.67	MEKEFNVTGTCIPEMHYMVDTLNKIDKIIKLVEKGKYFVINKPRQYGKTTTLFLLNRKLENYENYLPIKISFEGIGDAIFERENSFSKVFLQIMGRNLFLNDEKLAVFLEEQESKVENLNNLSNVITKLVIKANKKIVLMIDEVDKSSNNQLFLSFLGMLRNKYLLRNEGMDITFHSVILAGVHDVRSLKLKVRPDEEHKYNSPWNIASDFDVDMSFSKDEIGTMLDDYIGNKKVKLDKVYFSEMLYFYTSGYPFLVSKLCKIIDEKIMPEDDLQWKKEYMDEGVKKILRDNNTNFESLIKNIENNSKLKEMVKSLIIDGNRINYNVNNPIINIGMLYGIFKNENNNLKINNRIYEQIIYDYMSSLIETSTNSLSFYNEKSKFIMADGSLDIRKILIKF…
		0.782727
1	>gi|409744491|gb|EKN43057.1| CRISPR-associated protein Cas1 [Clostridium botulinum CFSAN001627]	0.87	MGSTRYITSIGELKRKDNSLCFRKNNKNVYIPVENTKEIYCMSEVSINSKLLDFLSQNNIVIHFFNYYEGYSGTFYPRKHYNSGKLIVKQVEAYKDKRLMVAKSIVSAIGENIYELLYHYYRHDRTEVKGTLEWIKNDMKINLEKAN
2	>gi|914327505|gb|KOA19138.1| CRISPR-associated endonuclease Cas1 [Clostridium homopropionicum DSM 5847]	0.85	MGSTRYITSMGELTRKDNSLCFRKDNKNVYIPIENTKEIYCMSEVSVNSKLLDFLSQNNIVMHFFNYYEGYSGTFYPKEHYNSGKMLVKQVEAYSNKRLIIAKAIVEAIGENIYEVLYHYYKHDKKEVKETIDWIRKDMKVNLHKANDIKQAMQVEGEAWQRFYGEFKHILPEDFVMNKRVKRPPDNPINALISFGNTLLYGKTITIIYNTHLDQRVSFLHEPSEGRFSLSLDLSEAFKPVVVYRTIFDLVNNKKLQLPKHFEKKVNYCLLNEEGRKIFITAFEERLESVFLHEKLKRKVTYRTAIKLDCYKLIKFILEDKEFKPFSLKEKV
3	>gi|923387206|gb|KOR26063.1| CRISPR-associated protein Cas1 [Clostridium sp. L74]	0.82	MGSTRYITSMGELKRKDNSLCFRKDNKNVYIPIENTKEIYCMSEVSINTKLLDFLSRNNIVMHFFNYYEGYSGTFYPKKHFNSGRLLVKQVEAYNDKRFIIAKSIVDGIGKNIYEVLYHYYKHDKKEVKPTLDWIKNVMRVNLEKANDIKEIMQVEGETWHRFYGEFKNILPENFIMNKRVKRPPDNPINALISFGNTLLYGKTITAIYNTHLDQRISFLHEPSEGRFSLSLDISEAFKPIIVFKTIFDLVNKKKIQVSKHFDKKLNYCLLNEEGRKIFITAFEEKLQSVFVHTRLKRKVSYTNAIKLDCYKLIKFILENKEFKPFSLKERM
4	>gi|530689960|gb|EQB88083.1| CRISPR-associated protein Cas1 [Clostridium sp. BL8]	0.82	MGSTRYITSMGELTRKDNSLCFRKGGKNVYIPVENTKEIYCFSEVSINTKLLDFLSQNNITLHFFNYHEGYSGTFYPRTYYNSGKLLIKQVEAFNLRRIEVAKSFVLAIGENIHEVLYHYYKHDKKGVKETIDWIKGDFKENLNKANQIKQILQVEGELWQRFYGDFKYILPEDFIMNKRVKRPPDNPINALISFGNTLLYGKTITSIYNTHLDQRISFLHEPSEGRFSLSLDISEAFKPVIVFKTIFELVNNKRIQVNKHFDKKLNYCLLNEEGRNIFITAFEERLESVFTHPKLKRKITYRTAIKLDCYKLIKFILEDKEFIPFRIKENM
5	>gi|692302162|ref|WP_032123128.1| subtype I-B CRISPR-associated endonuclease Cas1 [Clostridium sp. LF2]	0.8	MGSTRYITSMGELTRKDNSLCFRKDGKNVYIPIENTKEIYCLSEVSINTKLLDFLSQNNIIVHFFNYYGGYSGTFYPRERYNSGRLLVAQVDAYKNNRLEIAKGIVNGIGQNISELLYHYYRHDKKEVKETIDWIKDEFIINLDKAKDIKQLMQVEGEVWQKFYEEFKHILPEDFILNKRVKRPPDNPINALISFGNTLLYGKTIAAIYNTHLDQRISFLHEPSEGRFSLSLDISEVFKPVIVYKTIFDLVNKKKLQVSKHFDKKVNYCLLNEEGRKIFITAFEERMETVFVHPKLKRKVSYRTAIKLDCYKLIKFILEGKEFKPFNLKENM
6	>gi|653616503|ref|WP_027626928.1| subtype I-B CRISPR-associated endonuclease Cas1 [Clostridium lundense]	0.81	MGSTRYITSMGELTRKDNSLCFRKNGKNVYIPVENTKEIYCLNEVSINSKLLDFLATNNIIVHFFNYYEGYSGSFYPRNQYNSGKLLVKQVEAFTNKRLRVAKPIVKGIGDNISEVLYHYYKHGKKEIKTTIDWINKEFIESINKAENVQQLMAAEGEVWQRFYGEFKNILPEDFIMNKRVKRPPDNPINALISFGNTLLYAKTISSIYRTHLDQRISFLHEPSEGRFSLSLDISEVFKPAIVYKTIFELVNNKKLQVAKHFDKKVNYCLLNEEGRNIFIQAFEERLESVFTHPRLKRKVSYRTAIKLDCYKLIKFMMENKEFVPFNLQEKM
7	>gi|930451808|ref|WP_054199870.1| subtype I-B CRISPR-associated endonuclease Cas1 [Clostridium baratii]	0.78	MGSTKYITSIGELTRKDNSLCFRKDGKNVYIPVEGTKEIYCLNEVSINTKLLDFLSRNNIIVHFFNYYEGYSGTFYPKNKYNSGKLLIKQVKAFEENRLHIAKKIVSAIGENIYEVLYHYYKHNKKEVKSTIDWIKNEFYKRVCESKNINSLMAVEGEVWQRFYSEFKIILPEDFIMNKRCKRPPDNPINALISFGNSLLYTKTISAIYKTHLDQRISFLHEPSEGRFSLSLDISEAFKPVIVYKTIFELVNRKSIKVEKHFDKKVNYCLLNEEGRNIFIKAFEERLESVFLHPKLKRKVTYKTAIKLDCYKLIKFIMEEKEFKPFSLKEGY
8	>gi|749562788|ref|WP_040193682.1| subtype I-B CRISPR-associated endonuclease Cas1 [Clostridium sp. CL-6]	0.75	MGSTRYITSMGELTRKDNSLCFRKDGKNVYIPVENTTEIYCLSEVTLNTKLLDFITSNNIVIHFFNYYEGYSGTYYPKDKYNSGKLLIKQVEAYKDKRLEIAKQIVRIIGVNISEVLYHYYKHDKKEVKGTIDWIRKDFKERIDVVADVKQLMAIEGEVWQRFYGDFKYILPEDFIMNKRVKRPPDNPINALISFGNSLLYTKTISAIYRTHLDQRISFLHEPSEGRFSLSLDISEVFKPVIVYKTIFELVNNKKIQVSRHFDKKVNYCLLNEEGRNIFITAFEERLESVFMHPKLKRKVSYRTAIKLDCYKLIKFIMEDREFTPFSLKEGL
9	>gi|960404146|ref|WP_058296138.1| type I-B CRISPR-associated endonuclease Cas1 [Clostridium neonatale]	0.75	MGSTRYISSMGELTRKDNSLCFRKDGKNVYIPIENTKEIYCLNEISINTKLLDFLSQNNVVVHFFNYFEGYSGTFYPKAQYNSGKLIVKQVEKYTTTRMVIAKAIVKGIGINIREVLYHYYKHDKKEVKGTLDWIKEEFFERVDLSKDVKELMAAEGEVWQRFYGEFKNFLPEDFIMNKRVKRPPDNPINALISFGNTLLYTKTISAIYRTHLDQRISFLHEPSEGRFSLSLDISEVFKPVIVYRTIFDLVNNKKLKVDKHFDKKVNYCLLNEEGRNIFISAFEERLESVFNHPKLKRKVTYRTAIKLDCYKLIKYIMEDKEFVPFSLKEGM
10	>gi|944177399|ref|WP_055666026.1| type I-B CRISPR-associated endonuclease Cas1 [Clostridiaceae bacterium mt10]	0.75	MGSTRYIASMGELTRKDNSLCFRKDGKNVYIPIEGTKEIYCLNEVSINTKLLDFLSSNNIIVHFFNYHEGYSGTFYPRDKYNSGRLLVKQVQAFSEKRLDIAKAIVKGIGVNICEVLYHYYKHNKKEVKETIDWIKNEFFNRVDGSSNIKELMAVEGEVWQRFYSDFKYILPEDFVMNKRVKRPPDNPINALISFGNTLLYTKTISAIYRTHLDQRISFLHEPSEGRFSLSLDISEVFKPVIVYRTIFDLVNNKKLKVEKHFEKKVNYCLLNEEGRNIFIEAFEERMESVFSHPKLKRKLSYRTAIKLDCYKLIKFIIEDKEFIPFSLKDGM
		0.8
	Highest sequence conservation
1	Clostridium botulinum	0.7225	0.0538102
2	Clostridium sp. LF2 isolated from the gut	0.667778	0.0309021
3	Clostridium homopropionicum DSM 5847 isolated from sludge	0.74	0.0339116
4	Clostridium lundense isolated from gut	0.676667	0.0486256
5	Clostridium sp. BL8 from the gut	0.6625	0.0421202
6	Clostridium sp. CL-6	0.687143	0.0409828

## Sheet: CRISPR CAS III-A BLAST
			CRISPR/Cas protein
E88 Accession #	Genomic location	ATCC 453 AA Accession #	Cas10/Csm1 - Csm2 - Csm3 - Csm4 - Csm5 - Csx1 - Cas6	# AA	Predicted AA sequence
>gi|28203578|gb|AAO36019.1| conserved protein [Clostridium tetani E88]	1578402..1579985		Predicted AAA-ATPase	527	MKKRFNVTGTCIPERHYMVDISNKLDSILKLVNNEEYFIINRPRQYGKTTTLYMLERYLNKFKDYLVISISFEGIGDLIFQDEKVFSKEFLQIMSDSLLLNSQALSECLEEQKPHVENFIDLSRVITKFIVKAKRKVVLMIDEVDKSSNNQLFLSFLGLLRNKYLLRNVGKDYTFHNVILAGVHDVKSLKLKIRPDEEHKYNSPWNIASDFDVDMSFSIDEIKTMLDDYVENKEVNLDKEYFAEKIYFYTSGYPFLVSKLCKIVDEKIMVKDELKWEKEYLQIAVKELLKESNTNFDSLIKNIENNKDLQELVRKIILDGYEITYNEDNPLITMGVTYGIFKNSHGKVKIHNRIYEQRIYNYMISLIETKINLGFYTERERYLKPNGDLDIKKVLKKFQ…
>gi|28203574|gb|AAO36015.1| tRNA (5-methylaminomethyl-2-thiouridylate) -methyltransferase [Clostridium tetani E88]	1573868..1574944		tRNA (5-methylaminomethyl-2-thiouridylate)-methyltransferase	355	LKKKVLVGMSGGVDSSVAAYLLKEQGYEVIGATMQIWQDDKEFIEREGGCCSLSAVADARRVANKIGIPFYVMNFKDAFKKNVIDYFVDEYMEGRTPNPCVACNKFIKFSSFLDKAMNLGIDYVATGHYAIIEKQNNRYIIRKSEDDKKDQTYALYNLTQFQLERTLMPCGRYKKSEIREIAKKIGLRVHNKKDSQEICFIPDNDHGKYIKNRFPSKVRQGNFVDKSGNVLGTHKGIVYYTIGQRKGLDIALGKPMYVVDINPFRNEVVLGNLDDLLNTELIAKDVNYIPFDNLKEPMEVEAKIRYSQIPSKAVITPMENDKVKVNFTEKQRAITKGQSVVFYKGDLLIGGGIIE
			Intergenic region: Linkers	913	AGTTTCTTTTAATACTTATATATAAAGTAATATTATTTACCAGGTGATTTTAATTGATTACATGCTTTAAGGCATTGATTTAACAGGGATTGATTAATGTTTAAAGGAAGCATTTTAAAAAAGCTAAATCGCCTGGTAAATTTTTAACGAAACCTTGAAATATCAATGGGTTTATGATATTCTTAATTTTAAGAAACCTTGATTTTACAGTGGTTGAACAATAACAAGAGTTGTATTTAAATAGTAATAACTAGAGAGGACATTGTTAATAAGATATGTTGAACAATAACAAGAGTTGTATTTAAATACAAGTTACAGTTAAAACAGGGGTAGCAAGTGTGGTTGAACAATAACAAGAGTTGTATTTAAATTGCCTTTTATATAATGTCTGTAATGCAC…
	1	>gi|693310861|gb|KGI43988.1| hypothetical protein KY55_06185 [Clostridium tetani]	type III-A CRISPR-associated protein Cas10/Csm1 [Clostridium tetani]	716	MHISHKALLYSFLRYVESIDEKLYKKSSLSIKDRFLDQILQESYELVTQNIQIKANKSGTFRLMNIFSNIDGAKTKKFNLLKEIDLEKDNIILKENNGEIDREYCIIYIKSVIDKLLQNNDEKIYFLMSKYCANISFINSKNCDISLFDVAKVTAAIATCKEKNEEEYILIKGDFSGIQNFIFKTSSDGALKTLKGRSVYLTLLQEICAKYIVKELDLSICNILYSGGGNFYILASKSDENKIKLLRKELSRYILKAYNGEIYLALGYRCFKEKEFKNFSHLWKDVGEKVGSLKSKKWCELGLKDSFSEIFGPLDLGGSREYSCRLCGNINRKLKDGMCNLCISFKNFTKEMKKAKFYCEKIIPKVSISVNNDIKDIFKELGFEIKFSDKPLKGFKNYI…
	2	>gi|693310862|gb|KGI43989.1| hypothetical protein KY55_06190 [Clostridium tetani]	CRISPR-associated protein Csm2	135	MKKFCKSDNDSKFKEYEEYFKKNILTLNKVDYDEFIEKGKAYSDLLKNNGLTTSMIRKIYNEILKANEAIDLKRLRPMLAYAYGRNRVKGLQSLFYTLDDVLKRLNPKTDSSEIENVKEFLEVIIAYMKFYGDRY
	3	>gi|693310863|gb|KGI43990.1| hypothetical protein KY55_06195 [Clostridium tetani]	CRISPR-associated protein Csm3	249	MSLLIGKIFIDGDITLKTGLRIGSGNNSIEIGGIDNSVIKNHKGEPYIPGSSLKGKLRSLLEISRGDLKDGKPCICGKCNICSIFGVGANNNQGNLPTRIIVRDAFLKEEIKKEMYEKQGQFKRLELDYTESKYENTIDRLNSKATPRLIERVPEGVSFRFQIIYNVFNKEDVDKFNDLIHGMKLLEDDYLGSSGSRGYGQVIFNNLNIRVKIIKDYKAKEVLSKSSLENIDNDCLEKKLKELIRIKEG
	4	>gi|693310864|gb|KGI43991.1| hypothetical protein KY55_06200 [Clostridium tetani]	CRISPR type III-A/MTUBE-associated RAMP protein Csm4	351	MKKVILKIDNGTKFHIGNEQEVLEYIPSDKLYSAIINSLSLINSKYELNKLIKIINTKLQISSAFIGINIKKKSKGIEKNIDFLPRPYMYIGNNSITSSQLLDRKKFKKINYVSNDAFLNFNKYYDSQKNFVNYDFKEGYIIGEKYYVTKKEVNFLSEYEKEYLENYKPIINESIQRNYINRFSRESISTYYDNFKVIIQEKCKDIQLTPYFYFYIDGDLEIEKIVYAILEGGIGGKRTLGSGIIKDILIEECDNFKEDGERYINISMIYPNKQELSYIESYALENRNGYIYSEGPTNLKKPWIRMIKEGSVFTKRIKGNINEINVKGIDHPIYTYGKAFFITLGGDLNEL
	5	>gi|693310865|gb|KGI43992.1| hypothetical protein KY55_06205 [Clostridium tetani]	CRISPR type III-A/MTUBE-associated RAMP protein Csm5	366	MNYDKIILNLNGEVLTPVHIGCSKKYSPYLDIIKNENKIIVLDEEKIIEKLVLNDKVFEEYIDILKNRSPNSIEKYNIMNLLENNKIKIDEVKKYDLACGNTFNNLIEVNQVIKTRGVPYIPGSSIKGSIRTALICNKLLKNKIDFYKIRDISNLKNKRYSYIGQNIFRKNNKTIHEDIMKNLLVRDTDTISNSSLKVYLCRAINLYESIKNNDICVSIKSLNECIEKNTRITFSIIIKNSLCNKEELYNNINNFYEKVLIKEIEEMKKLKDLRIDIIISQYELLLNEINEFRKYNNGFILRIGGMKGIFSNTIDSILNEEELDYIRNSNKNRRKRTGEFPTTKWCIMDENESIQATLGWIKVREE
	6	>gi|693310866|gb|KGI43993.1| hypothetical protein KY55_06210 [Clostridium tetani]	CRISPR-associated protein (Cas_Cas02710);CRISPR/Cas system-associated protein Csx1	493	MDNILIINLGNSDIEKEGDKIEYKQFREKTKKIYEQLQKANKEEKEGVFRQLDFPIIKAIIDKVDKELGSKKLDGIIFAYTDQKCNNNQDTIYLYKILKEKKELINNLKTKDQEIWERRLKSSKFNYNKIEFNPSDIDKMYNFYTKKIKELNTKKIEKLFISITGGVSAMNFALLISAIEKFNGQVIPCYLPKGHKFAYKVKIAESLRKQMIKRDIKILIKNKDYFAVIKIFENLEDDIAEGISKSDLRNIILALKYAEARIQFNFDKSKEYALKCSDNIEEYREEFIELGKDISIGQDDYINRLVELKNNAKYLYKNGAYTDFLGRVYRFQEAIYEHILRQYNLIIEESNGCKINKEILENEYSDKKVSLDNIKIDGNTLKYKEGNLSVDAMSNIIIV…
	7	>gi|693310867|gb|KGI43994.1| hypothetical protein KY55_06215 [Clostridium tetani]	CRISPR-associated endoribonuclease Cas6	229	MNYYQLKIKVKLETDINYIEAPYLIGTFINNCMLKNSTLKNIHNKKIYKYVYDSFYPIERDGMYKKNKYYNIQIRTFNLNLINKLAIALYSHKYNGISTVNIDLEFIEPTKINELYTVKPSIVTIGRQPWIKNKYSIDILADSLNANLEKKYNQIFNHKLENNKSFMKEIKIINRIPIKYKYKNIMLLGNKYKIIVNKDEISQKKASIALGMGLGEKGSSLGAGFCIYR
>gi|28203450|gb|AAO35892.1| hypothetical protein CTC_01328 [Clostridium tetani E88]	1430219..1431136	>gi|693310868|gb|KGI43995.1| hypothetical protein KY55_06220 [Clostridium tetani]	DDE superfamily endonuclease; transposase	313	MPNKITNNIVSIDNEIYNYLNDVNYGMNKPQFQHLTSIFNGLINLSGTKSLLKISEHILTAKSSSSIYRFLSHSKWDDSLINRNRINYLNLHFSKLIKPKSVGFLVIDDTVNPKIQAKKMQGLSYNHSHTEGKNLWSHCIVTSNFVVGDISIPLNYKTYLSNENCIKHNKSFMGKSDIVVDFITSFEKPANCDKIYCLVDSWYTSQKLVDSTLMQGIHLIGTLKSNRKISPLGISMQLKEFGKYINPSTLDVVTVKGKKYRVYKYEGKVSKIENTLVLICYEVDGESFKDPVYLMSTDIELNVQTIIEYYLNR
			Intergenic region:Linkers	828	ATAAATTTTATATATAAAGTAATATTATTTACCAGGTGATTTTAATTGATTACATGCTTTAAAGCATTGATTTAACAGGGAGTGATTAATGTTTAAAGGGAGCATTTTAAAAAAGCTAAATCGCCTGGTAAATTTTTAATGAAACCTTGATTTTACAGTGGTTGAACAATAACAAGAGTTGTATTTAAATGTTATGCTGCAACTATGTGCTATGGTTGCAAGAAAGTTGAACAATAACAAGAGTTGTATTTAAATTCCCTTTCTTTTTGGCATAATAAAAAACTAGCTAGTTGAACAATAACAAGAGTTGTATTTAAATTTTATATTTGGATTAACAGTTGTTAATTTAGCACCAGTTGAACAATAACAAGAGTTGTATTTAAATTAATATTTAAGTTT…
		>gi|735001685|gb|KHO39108.1| NTP-binding protein [Clostridium tetani 184.08]	CRISPR/Cas system-associated protein Cas4-like protein	512	MHLGVEKDLQAALEFYKSNYYVLTDNHINEIIKFEYLIPKIKELLADINIYAQEYLISTHRFRGIVDLIVKNDDGTVDVFDFKYSNAIEHYMESLQLHIYKYFLEQQGFKVRKLGFIFIPKISIRQKKTEDLYQFRKRLFQELKASEIQIAEVPYNPNKVVEFMDSIIDTTEVKEYKKNPTRLCDWCEYKEYCLKGNDYMILPKNERRERKIDTNPDLWIYADSYVGKSTFIDQYEDLLFLNTDGNTDNTTSPLIRIIDKVWYEGRMQKKKFAWEFFIEAIEELEKKENDFKRVCIDLVEDLYEHCRLYTYDKLGIEHEQDAGFGKGWDMVRTEYLSAIKRLKNLGYQIIYISKEVVKEINLKNGAKLTTINPNINDKVANVLAGTVDLTVRAYMEGED…
		Protein #	CRISPR-associated endoribonuclease Cas6	% Identity	Predicted AA sequence
		1	hypothetical protein [Clostridium drakei] WP_032077065.1	0.57	MNFYELRIKVKLSQNMDLIEVPYNIGVFINNSMLKTALLKKIHEEKFYKYVYDTFYPMEKDKLYKKDKIYYFRLRSMNIQLLNKMAIAIYNHDYNNIKAIDVDLKVQEVDKINEIYTLKPAIVTIDSKPWLKEKYSVDLLMKRLNDNLEKKLNQIGEECEVVGLGSFINGIEILNKFPMKYRYKSINLLGNKVQIKVNEDKLSQKKALIAVALGLGEKGSSLGAGFCEYK
		2	hypothetical protein [Clostridium acetobutylicum] WP_034586773.1	0.59	MNFYELKIKVKLSKNMNFIEVPYNIGVFINNSMLKTALLKKIHEEKFYKYVYDTFYPIEKDKIYKKDKIYSFRLRSMNIQLLNKMAIAIYNHNYNDIKAIDVDLKVQEVDKINEIYTLKPIIVTIDSKPWLKEKCSIDLLMKRLNDNLEKKLNQIGEEHENRESGMFINEIQILNKFPMKYSYKSITLLGNKVQIKVNQDVISQKKALIGIALGLGEKGSSLGAGFCDYK
		3	hypothetical protein [Clostridium botulinum] WP_024933144.	0.74	MHYYQLKIRVKLENNINYIQAPYLIGTFINNCMLKNDMLKNIHKKKIYKYVYDSFFPIEKDGIYKREKYYNIQLRTINLNLINKLAIALYNHKFNGIKTVNIDLEVMEPTKINQLYTLKPSIVTITGQPWIKNKHSIDVLIGNLNANLEKNISKYLMKNLKIINLL
		4	hypothetical protein [Clostridium sporogenes] WP_058009048.1	0.42	MVYSQVKITAFLKKNIKFTQSGEVIGKIISKAMLLDEELKAMHKNREYKYVYNNLYPVEKTGIYEEGRVYIFNIRSFNKKFISKIKKLLSKVNSEFMRILAVEENSINQKYITELYTMTPVIVTVNNKPWLLNDGDLMFFQKRLQDNLEKKYKEIFGQELDTKQSFIQGIEILNEKPMVFQYKGIKLLGNKVKIVVNEDEQSQKLAFIATGMGLGEKGSSVGAGYCHAHYL
		5	CRISPR-associated endoribonuclease Cas6 [Bacillus thuringiensis] WP_001008582.1	0.44	MNFELIITVLLRENVHYEDSLQLIGGFINKTMLQNENLKALHKRKGYKNYVFSNFYPIEKDKIYKKNRVYVIRLKSLDYRFLKDLKECLPSIKNYALQCLSLELKQLSQKHIVDLYTVTPVVITVDNKPFLPEDSLDILCNRLQANLEKKYKAFYGEALFTESFMQRIEFINRKPIKTNYKGIELLGNKFKITVKGDEKSQLLARVAIGAGIGEKNSALGCGFCFANYL
		6	hypothetical protein [[Clostridium] purinilyticum] WP_050355590.1	0.45	MCFYQLTNTIFLKKDVHYIKVGEVIGQSISRLMLEDDYLKKLHKERCYKFCYDIFYPIEKGDKVYKAGKVYIFNIRSFNKEFISKIKTLLRRLDDEYIKVLSIEEKEIKRRHITKIYTRTPVITTVEGKPWIAGEDDLLLLQDRLQKNLEKKYNQIFNEEIKINHSFIQRINILNKKPIASLYKNIKLLGNKLEIYVNEDEDSQKLAHIAAGIGLGEKSSAIGGGFCHIHYLK
		7	CRISPR-associated endoribonuclease Cas6 [Bacillus thuringiensis] WP_001008581.1	0.43	MNFELIITVLLRENVHYEDSLQLIGGFINKTMLQNENLKALHKRKGYKNYVFSNFYPIEKDKIYKKKRVYVIRLKSLDYRFLKDLKECLPSIKNYALQCLSLELKQLSQKHIVDLYTVTPVVITVDNKPFLPEDSLDILCNRLQANLEKKYKAFYGEALFTESFMQRIEFINRKPIKTNYKGIELLGNKFKITVKGDEKSQLLARVAIGAGIGEKNSALGCGFCFANYL
		8	hypothetical protein [Clostridiaceae bacterium mt10] WP_055666020.1	0.41	MKYWEIKVTILLKKDIIFTSSSEIIGNNINYAMLKDEELKAYHKEKNYKYVFGNFFPPERDGIYKASRVYVFSIRSFNYDFISKIKICLEGYESNDFNIIAMDVREINEQPIEFIETITPAIVTVNGKPWLSSGDILLLVKRIHSNAEKKYKFFFGEEIGHVDDYFIEKLKILNKKPMYYEFKGKRLLGNKFKIKVNEDEKSQKLAFIILGAGLAEKNSALGAGYCIPDWRRI
		9	CRISPR-associated protein Cas6 [Bacillus thuringiensis serovar huazhongensis BGSC 4BD1] EEM80234.1	0.43	MRENVHYEDSLQLIGGFINKTMLQNENLKALHKRKGYKNYVFSNFYPIEKDKIYKKKRVYVIRLKSLDYRFLKDLKECLPSIKNYALQCLSLELKQLSQKHIVDLYTVTPVVITVDNKPFLPEDSLDILCNRLQANLEKKYKAFYGEALFTESFMQRIEFINRKPIKTNYKGIELLGNKFKITVKGDEKSQLLARVAIGAGIGEKNSALGCGFCFANYL
		10	CRISPR-associated endoribonuclease Cas6 [Clostridium botulinum] WP_045540188.1	0.42	MEFWELIATVMLKKDIYFEDCGYIIGKNINKSMLLDKDLKEVHPKKQYKNYVFNSFYPIERDKFYKKDRLYIFNIRGLSKEFIDKIETCLCNLESNDFSVISTSKKEIKQRYIKELYTQTPLIITVDDKPWLQNDGDLDLFKQRLEDNLEKKYKSFFNEEIDIKGKFIKSIEFKNRKPMHYNYKNGIKLLANKVSIQIEDNEEAQKLAFLAKAAGLGEKNSSIGAGFCK
				0.49
			CRISPR-associated protein (Cas_Cas02710);CRISPR/Cas system-associated protein Csx1
		1	>gi|640494750|ref|WP_024933142.1| hypothetical protein [Clostridium botulinum]	0.73	MDNVLIINLGNSDIEKEGNKIEFGEFREKTKKIYEQLEGANKEEKQEIFKYLDFPIIKAIIDKVDGELKNEKLDKVILAYTNQKFNNNKDTVYLYEILKQKKHLVNNLETDNQDIWEKRLKETNFKQSYNIDFDPSDIDRMYNFYAEEINELNNKKIKKLFFSITGGASAMNFALLINAIEKFSGQLIPCYLSRGKKVAYKVNIAKNLRKQILKRDIKILINNKDYFAAIKMLENLEDGIVDDMSKLELKNIILALKYAEARIQFNFDKCKEYGEKCLDNTAEYREEFSQAVKDILIEKDDYINRLVELKNNAIYLYKKGSYTDFLGRVYRFQEAVYEHILGQYDLIIEKSNGVKINKEILKSRYSDKKEILDNIKIAGNKLEYEKI
		2	>gi|692120813|ref|WP_032077064.1| hypothetical protein [Clostridium drakei]	0.35	MKNILITNLGNRDLQIHKDNVRAIKELYNDDEKMKDILNKGRLEDDGYMVFSKIFRELTQKILEYYPKGIEYIDFPIIKSIVKKVEGDLENEKLEKIILMVTDQQDIKHNGQDTVYLGEIIERLHRDKKLEIGLNQSKDNIEIASFCTKSNPSDYDEMRKFYQEKLSKEYDSNKIFLNITGGTPAMAFGLLYNASINASCRVIPFYTKQNTNRTVKFNISETLRKDDDKKQICEFITKNDYMTANILLEKYNNKYGVLEGKYETALNMVKAAHARIQFDFESASRYIDKAQDYDSGSRAVCDRFIYFIKELQNKQKIYLLNELKNNAIYEYENGAYTDFLGRVFRSLEDIYRFILIKKNILKINENDNLKLNKAELESAGIIVKGKLNVPQMSTILEKI…
		3	>gi|724474333|gb|KHD34262.1| hypothetical protein NL50_17710 [Clostridium acetobutylicum]	0.34	MKNVLIMNLGAQDLQIKADKLKKIRELFSDDKEMKETLESGKLMGKHFTVSPNNFRKLTSKLLEYYPKGIECIDFPIIKSIIKKVQMELENQQLQKIILIVTDQNDTKCNKKDTIYLGEIIKKLSIDKKLEKELNKSMENVEIVTCCTKSNPADYDEMIRFYDEELREEYDSDVIFLNITGGTPAMTFGLLYNTSINASYSVKPFYTKQNTNTSVKLNICETFRKDDDKSRICEFITKNDYMAAKILLEKYSEKYEVSKKKYQTALNMVKAAHARIQFDFENASKYINKAEDYDSESRFVCDKFIYYIKELQNKKNIYLLNELKNNAIYEYKNGAYTDFLGRIFRLQEAIYRYILIKENVLEENKKSGKIQRTREEKFRYNDNKPKIDIKYMSDKLREI…
		4	>gi|640494751|ref|WP_024933143.1| hypothetical protein [Clostridium botulinum]	0.73	MSKIISTLIDNDDVRNIVNRMEEIKDVKQLRNKSILAHGFEGISKEKIQGKLNCEEKDISKLLEEVMCKILVLFKIGTIEDMFYCENSRYDCILIEMIEKL
		5	>gi|951395774|ref|WP_057770842.1| hypothetical protein [Bacillus sp. FJAT-25496]	0.28	MECEASDVVKKNILICNVGNRDVQFAQGENEFPKNNFREVSKKIYGQYEEKKENLHFPIITTILLDLTKRIKKLNIHEILLIATDQNPPHFSDTLYSAQLIRKYLLDTKDDRKIWGGYLNQLKKPKIIAMQNNPSNMDDMYKFYSEQLPQILGDLDQYQNIFFSITGGTPAMNTMLMIHGINVGKDKAQIVYVPNKSGRSRNLNITGRMLLENHLLTIRQNIQHFEYHSAIQYLENNQEFFASRFPIKMLQNLICIFKYAFLRISFQFGEALEFIGHFSESRDDASLENLYDYIRDLTEHNVDDHVDKYMAELYWNINMLYSKGQFIDVCLRLFRFQEQSLREFVKRKLGVVLDEKVINQEWLKNNTGLRAYLEKSKIRYQGTITRATLQETANYYIQN…
		6	>gi|91201514|emb|CAJ74574.1| hypothetical protein kuste3811 [Candidatus Kuenenia stuttgartiensis]	0.26	MHNKIKILLIANIGSRDLQLEGEAIKPARIEGERMNENFKSVSEKLSTPILSPIINYLKDNNPDSDIELLLFSTNQEDAAEHYRSNDTLYFAKCIQQLYRGKKPITKVAIKEIDANPNLYDSMFEYFGKFLSGKKSMFDDHFDEIYVSLAGGIPACNMALCFHSISIFQQKCVPVYSLEGSGIVVPLQIGKQLIKNSKIALVLKQIENFEYSVASSLLRDLNQEDIASVAEITRHRLNFNFDLARSQSGKLIAKVSGKIRNLLIVFTSEFQELLDHDLKSLILELYFNAEIKWKKGEYLDFLGRLFRFQEAVLRYIVETNLEIVTDTDKNKNTYENYSRGIQNIEGLIPYLEQYPSENNKLLYNKPSVPTLMAILNFITQKNEGNTSFSNIFNTLRELQ…
		7	>gi|934119136|gb|KPL91718.1| hypothetical protein SE18_01685 [Herpetosiphon geysericola]	0.27	MRRIALCNVGNSDVAVNGVIIRPPRPAGEQHWQTYSEHAFSAPIIDAYARYFEQRQIVLDCVILFDTDQAENPTTSITDRYGVSLRDKDTCWFGKILERYLQERWSHVIRSVERRTIHNVNPSLYDDAMHAFGQQLSAINHQADTYYYVLAAGGTQAFNNALQFKAIARFRENCYVLYKSEHDSAPYSLNIPKQLLDSFNISTAIQLIRQHNFLGAITLLEGSVDKNIIEILWYAKYREDFNFDLAAQIIERIQFHVDGILRDLIRSIQHNAYQINQTDLKFLLVELYYNAQIAYDNGRYADFLGRVFRFQETVLRYVVETSFNISTDYSKAKKAASSTQFTKLLADDPALFEHLEQATIDGNKLDYSHFSVPVLVAMLNFLTKQQAQTYISQRQAGIY…
		8	>gi|159892038|gb|ABX05118.1| conserved hypothetical protein [Herpetosiphon aurantiacus DSM 785]	0.25	MQRIAFCNVGNSDVAVQGAIIRPSRPAGEHHWQTYSEHQFSAPIIDAFARYFQHRQLMIDRLIMFDTDQADTPASSVKDRNNVSLRDKDTCWFGMILERYIQEHWSHVIRMVERRTIYDVNPSLYDDAMQAFGQQLANIKHQPETEYYVLAAGGTQAFNNALQFKAIARFREACFVLYKSEHDQWPYSLNIRKQLLNSFNISTPIQLIQQHNFLGAITLLEGSVEPGIIGLLRYAKYREDFDFDSAQQILAQIQFDVDGSLRDLVRSIQHTAYQINQADLKFLLVELYYNAQIAYTNGRYADFLGRMFRFQETVLRYLVETTFKLSTDYSKAHKAENLAKFNQLLVDDPTLHAYLEQATLGDQKLDYQHFSVPVLIAMLNFASEKAGQRYLSKQQAGLC…
		9	>gi|222447771|gb|ACM52037.1| conserved hypothetical protein [Chloroflexus sp. Y-400-fl]	0.22	MTILVMCNLGNSDLNADSKRPSKPRPEGEQLWRSFTEHQFELPIIEPCLRFIIGRHPGDQLRLVCFYTDQPENPETTKADRFGVSLRDKDTIWLAHIAQRLIREKFAGQVSEVEIVRIENSRGPDLNPSVYDEVFEAYAYLLQRFVNQQVDRCYILTAGGIPACNFALQLQAMIAFADRCHFIYPPEGGRVTELRIGEEMSKAFQRVNALNALDQRNFPAALLSARAARVGEWIVALLEYAVYREAFDFQQATQAGARAQRHASGSIREFCRELQDDLQQLIRNDAAALLREVAYNADIAYRNGRYADLLGRLFRFQEGVLRLIVEKYLGLPTDFSKEQRDASLARYLELIDGNPALRDFLDQRTLDGKPLRYRDGPNRPVMQALLEFVLNGGTRADGT…
		10	>gi|156233287|gb|ABU58070.1| hypothetical protein Rcas_1982 [Roseiflexus castenholzii DSM 13941]	0.24	MHLLVLANIGNSDLIADSRRLQRPRADGEAAWQTFERHTFETPIIEPCVRWIIGRNGRIDRLILFYTDQPATPETLKPDRSGMSLRDKDTLWYARIIERLLRERFGDRIGHLECQAIRRIDGRNINPSIYDEAFDAYAGLVAPLVDAQTTCYVLMAGGIPACNTALQLNAISAFGDRCRVVYQPEGGQPYDLRVGDQVLNVFRRATAIDALERLDFATALPLVRQVADGAVAALVAYAHYRECFDFERAQTTLSHGIRQASGELRSFLANLEHDLDPLMLRSDIDALLRELVANATITFRNGRYADFLGRLFRFQEAALRFIIETKLGLPTDMSKERKATNLPEYRQRIDADPGLKAWLDARTIDGTPLRYDTPNIPTLQAMLDYLIDPASVKPDGAPY…
				0.367
			CRISPR type III-A/MTUBE-associated RAMP protein Csm5
		1	>gi|640494749|ref|WP_024933141.1| type III-A CRISPR-associated RAMP protein Csm5 [Clostridium botulinum]	0.76	IGEVKKYDLICGNSFNNLIDVNQSIKTKGIPYIPGSSIKGSIRTALIYNKLLKNGIDFGKIKEISNLKNKYYCYLGQDIFRQNDKLIYDDMMKNLLVRDTDIISNNKVKVYLCRAVNLYESIKNGNISTSVKSLNECIEEYTDFTFSIIIKNSLISKEELYNNINSFYEKILLKEIQEIEKLKLNIINSQYKLLLNEINEFRKYNNGFILRIGGMKGIFSNTIDSILSKKELEDIRNAHKNKRKKTGEFPTTKWCVMDEYENIKTTLGWIKIMEE
		2	>gi|692120812|ref|WP_032077063.1| type III-A CRISPR-associated RAMP protein Csm5 [Clostridium drakei]	0.42	MSYLQKDIINLKIKTLAPIAILNDDNSKLSPYIDVIRDKDEYILLDIDKISDILISDEKYYNKYLEILRNKRSNSRDKYTIKNLLRDKNIKLEEVEAGRIKCSCNIKGNVEINTCIKSKGIPYIPGSSLKGGIRTAVLYNKIDKNDVVGKQKIFSREYVGQDIFRKNPKSVQEDIFKNLIIRDTEIDSNIQTSIYEARSINIYKDINSEKLNLDMKMLLECIDQNQTLNSQIILKGNDFKKEDLFYKINDFYEKAINKELGEISKVRFNEKDILINEYSLLLEKIRKFKNDKNGFISRVGKLKGFFSNTLTAELNDDEIYNFAIYPKKRRKKGEFPTTKWVISSDNDIRGTFGWIEVKER
		3	>gi|724474332|gb|KHD34261.1| hypothetical protein NL50_17705 [Clostridium acetobutylicum]	0.4	MNYLEKDIINLEIKTLSPVVILNDNNSKLSPYIDAVKDKNEFVLLDIDKIADIIINDEKYYNKYLGILRNKKSNSIDKYTVKNLLQDKNIKLENVEAGRIKCNGNIRGNVEINTCIKSRGISYIPGSSLKGGVRTAVLYNKIEKNDVVGKKRVSSKEYVGQDVFRKYPKIVQDDIFKNLIIRDTAIDAKAKTSIYEARSINIYKDINSEKLNLDMKLLLEGIDKNQTLYSQMILKNKIFTKEDLFYKINDFYEKVISKEMDEISKVKFSEKNILINECNLLLEKIRGFKKDNSGFISRVGKLKGFFSNTLAAELNNDEIYNLVVKIKKKRKKGEFPTTKWVVLKDDSIEGTFGWIEVREI
		4	>gi|333751800|gb|AEF96879.1| CRISPR-associated RAMP protein, Csm5 family [Methanotorris igneus Kol 5]	0.27	MKLEMLSPLHIGSGETLTPADFIANESEIIVLDLNKLFNMLISIGANIDEITEILETESYPWKKILKKYNLNPKEFERYSLKLIGNKGKYSMQVRAFIKSGGYPYIPGSSIKGAIRTAIMYKIVKNNPELLNQAVRKLYNEVKDLNSRGIGRVIKTADNWLEARIFGCNNRGYYEPKKDTLKGLIIRDSERISPRKLKVYGVWTIGERGTIPQYVEGLENVKIDFEFTIDENLLKLNYGEFNGTLKDINWEFIENALREFYEEVIKVELREIHKYGRYRDEVLEFYQDMQMKLESGEIPIRIGWGSGWYSTTLGVLLKTHPNFENLRRKLGLGRNPKTKKIVNDFPKTRRVANKKPLGWCFLKC
		5	>gi|390520420|gb|AFL96152.1| CRISPR-associated RAMP protein, Csm5 family [Thermococcus cleftensis]	0.26	MKLTVLSPLHIGNGNELTVIDVLPLNDGRIAVLDLERLMLELTSAGADVEEILTLVKAPDIMEDMYIWKRYLSDYGVGLEKVKKYTLPVVGRIAPRSMRIREFIKSSGRPYIPGSSVKGSIRTAVFYHVALKYRSRVEKLLEKLADSEGRINPKRADDELEMLVFGYARGRRGRRRYEPKRDPMRALVVRDSEPLSIRNLKVYAVSTVGGKSEIPQYVEGVEGIDVEIEIRVDNELLSRAMRAGELNGLLADTIKGKEDFEDLIWKAIDSFSREVISFERRELRKYGAFRESVGRFYSQLERMEGHKLRVGWGSGWYSMTLGPLILGTDFFKHIRRKFQLGRKPGTHALSGDFPKTRRVANSRPMGWVILRE
		6	>gi|261370333|gb|ACX73082.1| CRISPR-associated RAMP protein, Csm5 family [Methanocaldococcus vulcanius M7]	0.3	MKLEILTPTHIGSGEKLLPTDYYPIKDMHGNITKIIVIDIDKLFNTLISMGVNVNEVVEILRESKSYPLTKIFEKYHLKPKDFEKYPLDIVGGYGKYSMQINTFIKTCGMPYIPGSSIKGAIRTALMYYIVKDNKKLLSDIINELNKIVTQKNAKNFVKRADDKLDKKIFGNDPKFDVLKSLIIRDSEKISLKKLKVYKVEILGNDAPIPTYIEGLENIKINFEMQINDAILKNVNFNGMLKNIDFELIKNAIREFSKAVINAEINEIYKYGKYKENMLKFYKNLEDKIEDGELFIRIGWGSGWYSTTIGVLLKTHPKFEELRKKLGLGKNPKTKKVVNDYPKTRRIVNNKPLGWVKLEGELWLI
		7	>gi|189495640|gb|ACE04188.1| CRISPR-associated RAMP protein, Csm5 family [Chlorobium phaeobacteroides BS1]	0.26	MTKALISHKVSLTTLSPVFIGAGAEHVLSPYSDFVQRGDSLIYIDTDRLQDAMQGDKALIEAFVKGMRHIENNRLTFVLEKFITGTLGREVDDFAARVVRIDGDIQKNHIRRFIATGGKPFIPGSSLKGAIRTAVLVDWLLNRKAGEPIFNQIRENINKRDRRSLKDMNLEQACFGTISRDVFRNLRISDSSVIESSSLWVGEMRRVALPTEKKKKQQQSSIPQWSEVIGPSVETTFPLSLTTPIEKTGFDFLDHQSVTKLFPIINRISLDSCLRELGELKGNQDFRDFFRFYEKLEQEITSLKTDEAILRLGGGKTWFDNSLGLSIDCEEFRPEALLKKYLDLVLDFKHDPFPSTRSAIVRNGVPVYPLGWVKLTLLKN
		8	>gi|217336103|gb|ACK41896.1| CRISPR-associated RAMP protein, Csm5 family [Dictyoglomus turgidum DSM 6724]	0.28	MKIKIQVITPTLIRSGEVISNVSECVIEDNRLKIIDKEKLLNMFKDKNLKNFVNELSSMITNQRENIKDLLNKYKIPIDEVIKYSLEIKSKIERNNESSRQPSRNIYMPILTGENAYIPGSTLKGVIRNALLFYALEKDKSKQNAFLEKTAERIKSEIPKKNKPYIGEDILRTNEKDIHTDIMKYIIVRDSSLVPLSELNVYVIRRIPHQKLSQYVIAIPAGKEFDTEIIIKKDMISNIPTEWKDFFEKEPEEKLWSALKNYSLKLSKKEQELLSELSSKKYSNNEEAKNTINDLIEHYNKVQQELKEQEQKNKEVIYLPIGFGKTYYYNSLGYFIKTEQLKNLGIIRRNVDPQIYPSTRWAVQIGKKLFPLGGVYIIRND
		9	>gi|516896816|ref|WP_018153863.1| type III-A CRISPR-associated RAMP protein Csm5 [Methanothermococcus thermolithotrophicus]	0.28	MNIFEQNNSTKKTLKITTLSHLNIGCGDFYTNLDYYIEGSKAKIIDMGRLLESLDDANKIDELVKLIKSNMGNNRMEIGVKEAYESINIYPDKFILKEIDCKIKEDASVQIKKFINQNGKYYVPGSSLKGAIRTAYIFDYYDKNIDKLVSILKDRGIYNNKKGSAVVENAIGKIKDDFFKYLLITDSDFIDSNNFEFIETRRYNIEYKRKNKSNIYGNKECKEALKKGSEFTIELTIKKGFPNNFEEIKNMCNNLTRTIIQFEMKNRYLPQGLKDFYKNKILNDLNNNNAFYLLLGSGSGFLSKTIYLLLWKHNKDLNLIKRILPLKKGKDKRTGKFLVQPVNDYIEFPRTRVIDSKKEIPMGWIKIEGIK
		10	>gi|656282876|ref|WP_029228522.1| type III-A CRISPR-associated RAMP protein Csm5 [Caldicellulosiruptor acetigenus]	0.25	MAHEPFESRTYEIEVLTPTIIGGQDKIQSFEFVKDGDYLYFINFDRLLEENLFKESFIDELSRGLSTGGRDFNIKDVLARYNIDFKNSSKYKLKLEGVKRLSKEVVPFVKSAGRFYIPGSSLKGAIRSFVTKALNRNFIQLYENDLSSAYQKTLNSADRRNSVDPKYVSKDAEEKIFATPYESPFKHLKISDSDFVSSENAGVYEIKVMNICGGQVKWFAGRSNEDDPDRAVSIIAEGIKPGAKLIGSIKIEKDFVEGNQVVRGIKEKIGVNATATSPTEFLADVLKAVSKDYIQREINFYTRYKQAQIVSEYQKLLNVLNSLDKNQFLIQIGFSTGYLSKTVGIFFNKNHFEKLAKVDRQSKIYPELFPKTRRLVFKNGQVWTVPGWIKVTIK
				0.348
			CRISPR type III-A/MTUBE-associated RAMP protein Csm4
		1	>gi|724474331|gb|KHD34260.1| hypothetical protein NL50_17700 [Clostridium acetobutylicum]	0.45	MKKVILSFKDNAKLHIGEELYDYISSDKLYSMIVNALSYVITENELNIIVKLINEKVKISSAFLGLKITKNNVHQYIDFLPKPYLLIREKEISRKIEEENLLNRKKYKNITWVSCNTFENLSKKYDFNEDYIDYSFKNGFIIDGRYYIENYEVEDDVRDILEDYSPIKKDMIQRNTIDRLIKASIDTYYDSFSILSIKESNGIKVEPYFYFFIDDDEEILKDKYIEALQLISIGGKRSLGAGVIENIDISEYKFNTFYNITRYVNISMTYPKESDLSKMSKYSLENRNGFIFSKKSTNIKKPTLRMIKEGSIFNGKVEGDIYSFKVEGISHDVHVYGKAFLYPFGGEK
		2	>gi|692120811|ref|WP_032077062.1| type III-A CRISPR-associated RAMP protein Csm4 [Clostridium drakei]	0.47	MKKVTLSFKNNAKLHIGEELYDYISSDKLYSMIINALSYIISVDELNGIVNLINEKVRISSAFLGLKVTKNNISNNIEFLPKPYILIKEKEISKEIEEENLINRKKYKNILWISSNSFGNMSKNYDLQEDLINYSFKNGFIIDGKYYVENEEVDEDVQKVLEDYSPIKKDMIQRNIIDRYTKESLNTYYDTFSMFSNKETDCIRIEPYLYFFLDDKEEILKDNYIQALQFISIGGKRSLGAGVVEKIGISNYKLDIYDNEKIYINFSMIYPNKKDLSKISKYSLENRNGFIFSKRSTNIKKPTLRMIKEGSIFNGKAEGEIYSLKVDGVNHDIHVYGKAFLSPFGGEK
		3	>gi|640495148|ref|WP_024933460.1| hypothetical protein [Clostridium botulinum]	0.84	MQLIPYFYFYIKGDLEIDKIMYAIIEGGIGGKRSLGAGTIKDISIEECDDFKENGERFINISMIYPDKQELNYIESYALENRNGYIYSQGPTDLKKPWIRMIKEGGVFTKRIKGNINDINVKDIDYPIYTYGKAFFITLGGNLDEL
		4	>gi|640495149|ref|WP_024933461.1| hypothetical protein [Clostridium botulinum]	0.83	MKKVILKIDNETKFHIGNGQEILEYIPSDKLYSAIINSLALTYSKYELNKLIEIINEKLQISSAFMGIKIKNKNKGIEKSIDFLPRPYMYIGNNNIISTQLLNRKKFKKINYVSNNVFLDFNKHYDSKKILSIMIFNKAI
		5	>gi|407513895|gb|EKF48768.1| CRISPR-associated RAMP Csm4 family protein [Thermosipho africanus H17ap60334]	0.29	MKRYRIKLKFRSPIHIGQKDNVFNDISKIIHSETLFSAIVNSYSLLYGIDETSRFINEITENNNLFNISSAFFYFKNKYFFPRPLGYNFGLDKKYDYKQVKKIEYVSEEFLNGEVKEPRIIGKFAVEGACGELSKIFAMEERPRIVVDRLTNSTSIYYMSGIKFFENSGLWFYLDVDERFERPVLSAIRLLSDEGIGGERTYGYGLFDLEIENVEVGKEDGENFLLLSNFYPKDAEELSRLITYKLYERSGFIYSPYGLVVRQPILKFVSEGSVLNEKVAGKILDVTPEFFNVHKVYRYGRAYLIPIKKEARD
		6	>gi|516896815|ref|WP_018153862.1| type III-A CRISPR-associated RAMP protein Csm4 [Methanothermococcus thermolithotrophicus]	0.27	MHIVKLIPNKNSKYHFGEGDLSESSVVFHSNSLFSAMVNNFIKLYGVDEFNKYGEEIKKLKISSLFPAIYKFKNKNGSEIEDEILFIPKPMVMLGFDKDTQEDIEEKPKDFKKIKFISIGALKKHNEKTLKKITIGKEYLITEDEKKKFGYNKPENMNLFKNIIEQKVSIDRIKGITLEDSEKGQLYAIEFIKPLRKDDKIVGFYFLADFNDIDGELVKKIRASIRLMKDEGLGGKRSIGAGIFKDIIIDEFNEDLSIDNKLLGKNYQQKNKTYISKEKNAVLSITIPKENEFENFNSYQLIKIGGYIYSSSNMEHITKLKKNVYALTEGSICEKSVEGQVLDLKPDTVEHEIVLNGRPILIPIVSYELDKGGIYEYI
		7	>gi|217336104|gb|ACK41897.1| CRISPR-associated RAMP protein, Csm4 family [Dictyoglomus turgidum DSM 6724]	0.29	MKVEVYKLLKEGPLLLHIGLRRLDRTSNIIHSDTLFSALSNSLIKLFGEEKFDLFEKNLVISSVFPGLRLSKDILLLPKPEIPIKTSEEDHKKYKKFQWISLDALKKLLANFDKNSKQIFIQNVEEFKFLNPRTLITKSEFEEIGEEIYFMGTTLEPKVRVSRETYYKAKADEENSYTTLYFQENLELHPIKLSNRKTIIPFLYFLKMKNNEIEELFTPSLSLTLEEGLGGERTTGKGIFDTFEKEELEVPENGEFEISLSLTFPKREEVNNLIYYQLVKRDGFIYYQKPTGYRKKTHYKIAEGALVRSPYVGENINVSPISSMKVISYGKSLGFKIS
		8	>gi|651375100|ref|WP_026487326.1| type III-A CRISPR-associated RAMP protein Csm4 [Caldanaerobius polysaccharolyticus]	0.27	MKSYRVKLKFKGPVHFGYKEKMDNVTEYIVHSDTLFSGILNCYSLLYGKKRTDEIVERVLCEDLPFKLSSAFLYIDEEYLIPKPINLDLSAVVGDFKKAKKIRYVPLDYSYKQAKSEVYIKGPIMITKNYDRIFSIDERPRVTLDRIEHSSEIYYLSSCTFGENVGLWFYLDVYDTGIEKEIQAAIRLLGDEGLGGERTYGFGLFCVDFCEEKDNFDLESDQYLLLSLFLPSEDDDLKDGLISYELTERGGYVYSPFSSNLKKKKVRMFLEGSVFKKKYNGKIADVTPDNFNTHKVLRYGIPYWKPILLSGQRG
		9	>gi|548794099|gb|ERM92367.1| hypothetical protein O163_05500 [Caldanaerobacter subterraneus subsp. yonseiensis KB-1]	0.37	MAVNAVKMYFISPLHSGRYGRGMENVDTVIHSDTLYSIIFQTWAKLYGVPEELPIKITSAFPFVENLYYLPKPGLKAPEFEKDEIREKYAKKVKSASVVTFEVFENWIKGWGIDYEKMVEDQRLLSENIKINTRPRIAVDRLSSDTSLYFVREIVFRKEKTGLYFAVECEKEEWQKIKTIFSLLQEEGIGGERSLGYGKFRAEFVEDFRLPSAEDGDKYVTLSLFCPANKEEIENAAVSYQLVLRSGWSIAGGEHFLQKRIFMFSEGSVFTKEVKGKTENVAPDKSPHPVYKYGKAFLVKAR
		10	>gi|149794068|gb|ABR31516.1| CRISPR-associated RAMP protein, Csm4 family [Thermosipho melanesiensis BI429]	0.32	MKNYRIRLKFKSPLHVGQVDKVETVVSDIIHSDTIFSAIINSYNLLYGKEKTKELLKFILENEDSILISSAFYYYNDIYFYPRPLGYKFDLDKKFDFKKVKKIKFVSEEYITGKVKTPIIINGLATDNKEIERLYFIEERPRITVDRITNETNIFYVSALRFIENSGLWFFLSLSEEIEREIFAALRLLSDEGLGGDRTHGNGNFDFDVEKVDFGRFQGDNCLLLSVYYPKNQNEIDSTLSYKLYERSGYVYSQYSMSYKQPLVRLFAEGSVFKNKVTGDVLDITPIGFEYHKVFKFARAYTIPIKKEAQYDI
		11	>gi|748194673|ref|WP_039765739.1| type III-A CRISPR-associated RAMP protein Csm4 [Caldicellulosiruptor sp. F32]	0.26	MDKNKICRAVMSFKAPVHIGEKEKLYNITRAFAHSDTLMSGIINAYSLLYGKDETEKLISKFINGTPPFEVSSTMPYVNSQYFVPVPLGLNMDEYKNKGIINAEHQKELKKIKFVREKDLLEGFLFKYRPAGSFLIPQSEFENGRKKAFSLGRTKERARVSIDRQTSSSNIYYFSHYEFEKESGLWFYLKINNEEQENKIKAAIRLLGDEGLGGDRTCGLGSFKVDFKDDVPQFKSDKSKYYMSLSLVNPKDEDEIKSVVFYEILTRSGYVYSKAGLGIKRKTVSVFGEGAVFSSKICGRVVDVTPEKFLSHKVYCFGLAFLVPLPEGVMLFGSR
				0.421
			CRISPR-associated protein Csm3
		1	>gi|640495150|ref|WP_024933462.1| type III-A CRISPR-associated RAMP protein Csm3 [Clostridium botulinum]	0.82	MNLLMGKIFIDGDIILKTGLRIGGGNNSIEIGGIDNNVIKNHRGEPYIPGSSLKGKLRSLLEISTNRLKDGRPCNCGECSICSIFGVGANENKQNLPTRIIVRDAFLNEDIKKQMYEKQGQFKRLELNYTESKYENTIDRLNSKATPRLIERVPEGASFRLQIIYSVFNNKDIDNFNDLIKGMKLLEDDYLGSNGSRGYGQVEFDNLNIKIKVIKDYKTKEVLNKSSLTDIDSVCLKEKLNELIEIKGV
		2	>gi|724474330|gb|KHD34259.1| hypothetical protein NL50_17695 [Clostridium acetobutylicum]	0.56	MLGRLIINADLVVKTGLHIGGGSSSVEIGGIDNSVIKNHKGEPYIPGSSLKGKLRSLTELAHNKMGKNEKGENIPCNCGECFVCKIYGVSASEEIKNSDRLPTRIIVRDAFLKDSIAEDMRKKKGEFKDLELGYTESKWENSIDRLTSKANPRLFERVPEGTVFDLEVIYTIYNEEDINNFKHLIEGFQFLEDDYLGGNGTRGYGKVELNNIRVFIKTINDYTSKQIGEVIASLNEINDTWIENLKKQMSSTK
		3	>gi|692120810|ref|WP_032077061.1| type III-A CRISPR-associated RAMP protein Csm3 [Clostridium drakei]	0.54	MLGRLIINADLVVKTGLHIGGGSSSVEIGGIDNSVIKNHKGEPYIPGSSLKGKLRSLTELAHNKIGKNEKGENLPCNCGECFICKIYGVSASEENKSTDRLPTRIIVRDAFLKDSIAETMRRKEKDFKDLELSYTESKWENSIDRLTSKANPRLFERVPEGAIFDLEIIYTIYKEEDIENIKNLIEGFQFLEDDYLGGNGTRGYGKVKFENIRFFTKTIKDYTSKQFGDTKASVDEIDDIWIGKLKEQMIDTK
		4	>gi|217336105|gb|ACK41898.1| CRISPR-associated RAMP protein, Csm3 family [Dictyoglomus turgidum DSM 6724]	0.48	MDKFIGKIFIEGEIVLVTGLHIGGSKETGEIGGLDNPVIKTVEGIPYIPGSSLKGKIRSLLERTYDIKPPKEPGEPCGCGECEICQLFGSHSTENKTISRLIIRDSFLDEEDFQQKFGNALEGGYTEEKVENIIDRIKGTAKDPRIMERVPAGAKFKFSSAISIYEKDDIQKLLMTFVEGMRMLEDDYLGGSGTRGYGQVRFENLNISIKSIKDYLGDNTKKTIIEGKALSEIKMEDLTNKIEDKLSNK
		5	>gi|206740623|gb|ACI19681.1| CRISPR-associated RAMP protein, Csm3 family [Dictyoglomus thermophilum H-6-12]	0.46	MNKFIGRLFIEGDIRLLTGLHIGGSRETVEIGGLDNPVIKTIEGIPYIPGSSLKGKIRCLLERARNINPKEGEPCGCGKCEVCLLFGSHNDKTKTLSRVIIRDSFLDQEDFKNNFGKYFDRDIEYTEEKTENIIDRIAGTARYPRTMERVPAGAKFKFSSSIAFYEGDDVEKLVKTFVEGMRMLEDDYLGGSGTRGYGHIKFENLSFYVKPYESYYKDNQRKEIGKSVALTDKDIVEELVKELKEVLKK
		6	>gi|77995774|gb|ABB14673.1| CRISPR-associated RAMP protein, Csm3 family [Carboxydothermus hydrogenoformans Z-2901]	0.43	MEELKLLGKIVIKGKIKALTGLHIGGAQGNTEIGGVDNSVIKDEEGKPYIPGSSLKGKLRSLLENHEGYLSATKLVLQKKGAEPIRIHICNEPECPVCIIFGRNHGKYTLADNQTELVISNATPTRLYFRDACLDEESIKDIKPNLDLEWTEVKFENSIDRITSAANPRQTERVPRGAEFCFELVYNVLREEDKELFSKVLTAMKLLEDDYLGGSGSRGYGKIMFKDLAVYWKSREEYETGNFSAQPIVMGSLEELMQKNIPQLLK
		7	>gi|654585897|ref|WP_028052952.1| type III-A CRISPR-associated RAMP protein Csm3 [Carboxydothermus ferrireducens]	0.42	MEELKLLGKIVIKGKIKALTGLHIGGAQGNTEIGGVDNSVIKDEEGKPYIPGSSLKGKLRSLLENHEGYLSATKLVLQKKGAEPIRIHICNEPECPVCIIFGRNHGKYTLADNQTELVISNATPTRLYIRDACLDEESIKDIKPNLDLEWTEVKFENSIDRITSAANPRQTERVPRGAEFCFELVYNVLREKDKELFSKVLTAMKLLEDDYLGGSGSRGYGKIMFKDLAVYWKSREEYETGNFSAQPIVVGSLDELMQKNIPQLLK
		8	>gi|651375099|ref|WP_026487325.1| type III-A CRISPR-associated RAMP protein Csm3 [Caldanaerobius polysaccharolyticus]	0.44	MEELKFQGKYIITADIVAKTGLHIGSSESSLEIGGVDNSVIKDAQGRPYIPGSSLKGKMRALMEYAEGLINPDNLVFTVEKKDNKEESIRIHMCDKVDCPVCNIFGRNHGNHNFVNGGPKKIDSVITPTRLIVRDAYLIEESITKEMKENLDLDWTEVKFENNLDRITSNANPRQTERVPAGARFEGQFILNVLNDEGTKYLKKLLEAMELLEDDYLGGQGSRGYGRIAFENLKIVFRSKEFYEGTKDEEIVTQNCDCIREALNKLK
		9	>gi|154154004|gb|ABS61236.1| CRISPR-associated RAMP protein, Csm3 family [Fervidobacterium nodosum Rt17-B1]	0.47	MAVKSFKGKYIVKADIRLITGLHIGTSKDDLEIGGLDNPVIKDPEGKPYIPGSTLKGKLRVLSEFFNGKVDESGKPHACDDEKCVVCGLFGTGILRTESKTLYLRRLIVRDAYIDPESLKDLEEYLETKWTEVKHENMINRLTSRANPRPQERVPAGAVFKAEFVVNIFEGDNEDYLNELLKIMKLLEDDYIGGSGSRGYGKIKFENIKIIKREKDYYTGDKEERTIKEIKCLEDVAIKSSH
		10	>gi|383110016|gb|AFG35619.1| CRISPR-associated protein, Csm3 family [Fervidobacterium pennivorans DSM 9078]	0.48	MEVKDFVGKYIVTADIEVKTGLHIGTSKEDLEIGGLDNPVIKDPKGRPYIPGSSLKGKMRVLSEFYHGKVSKDGNVHKCTDPNCPVCGLFGTSVDNKSDNTFARTRLIVRDAYLDEKSLEPLSDFLETKWTELKYENTINRVTSRANPRQQERVPAGAIFKAEFVVDIYDGDGDKFLKNLLLAMKLLEDDYLGGSGSRGYGKIEFKNIKVLKRERDYYLGNKEEEKVGEYSTLKKALEELK
				0.51
			CRISPR-associated protein Csm2
		1	>gi|640495151|ref|WP_024933463.1| type III-A CRISPR-associated protein Csm2 [Clostridium botulinum]	0.83	MEKDYKTDKFREYEEYFKKNVLTLDKINYDQFIEKSKDYSRLLKNNGLTTSMIRKIYNEILKANEAIDLKRLRPILAYTYGRNRVKGLQSLFYTLDDLLKRLNLKTNYLEIENVKEFLEVIIAYMKFYGDRY
		2	>gi|692120809|ref|WP_032077060.1| type III-A CRISPR-associated protein Csm2 [Clostridium drakei]	0.47	MNNNSGWNNRNHQNNKFQNGKPQNRNERYDDSEKYANYFNEIILKITSLKEEYDKYINECKDYAYYLKRDGLTTSQVRKIYSDIMNAETAIDLKRLRPRLAYIIGKNERNRAIKSLINILDKGIEKLNIKDVDEEIKSLKEFMETIVAYRKYVGNDK
		3	>gi|724474329|gb|KHD34258.1| hypothetical protein NL50_17690 [Clostridium acetobutylicum]	0.43	MSKNNGFYDNRKGTNSKPQNGRQKTNDSEKYFSEIILKITSLREGYDVYIDECKKYAKYLKSEKVTTSQIRKIYSDIMNAETAMDLKRLRPRLAYIYGKNEKNYAIKSLINILDEGIKNLEVNDNEEEKKSLKEFIETIVAYRKYCGDNT
		4	>gi|916689226|ref|WP_051296317.1| type III-A CRISPR-associated protein Csm2 [Flexibacter elegans]	0.38	MKGEKNHQKDSNSNPKGDFRTKTFAELAQEADNFFKNGLKSELLKFKQSDKIDAIFEKTEDFVEEYGKDVSTHQLRNIFQEIKKAKDVASLKLIRPNLAYIAGRLDNIKAKTFVAFLDSLIKEVKDETTLENFKDFMEAIVAYHKFYGSK
		5	>gi|806921337|dbj|BAR52340.1| CRISPR-associated protein, Csm2 family [Tannerella forsythia KS16]	0.34	MAEKFRQQPQSYSQNKREESSLQDFAQKVKQRYFEGALFEQLLQLNTSDVGLQKKLPVDAIINAVEKFIKNYANEITPTQLRNIYSKIKGGDSPLELKLLRPNLAYVAARQGKKEAKEMIAFIDLLIQKTDDRSLDSFKKLMEIIIAYHKFYHTKK
		6	>gi|206739443|gb|ACI18501.1| CRISPR-associated protein, Csm2 family [Dictyoglomus thermophilum H-6-12]	0.28	MNERNFPQKRKSSVNPEEGWRSEVEKFLGKDFVQRVLNFHDLEIEEFKDFNNKIQKFVEDIANNITTSSLRKIYDLIKNSEDASDLVFKLPYMVYMVGKEKDAKREALGKLYIALKDPIENIKDERQVRNIKKFAEALVAYQKLYGGKEER
		7	>gi|333751706|gb|AEF96785.1| CRISPR-associated protein TM1810 domain protein [Methanotorris igneus Kol 5]	0.34	MGYSKYQNPNPKNENKAGKNSDKLKLLDEILNVNDKNIKKFLNYAEEFANKNLKYISFTKIRKFYDYLNEISPEDEDWIIKFAHLKPMVAYHYGKEKRNQGLFELKKLIDAVFDKIYNENDENKRKEMFKHFKKFFEAIIAYKRFYEGK
		8	>gi|478431572|gb|ENN95915.1| CRISPR-associated protein, Csm2 family [Methanocaldococcus villosus KIN24-T80]	0.31	MGYSRYQNLKGERGEGNRKKEEKEIVLNDKEIDIILNITSENANKMVEIAEKFANEILSIPNTKIREFYDYVLKIKENEDWYKKLVLLKPKMAYTYGKETNKGKKIALKKLHDTFSEIIDRIDNLNKFNNFKTFFEAVIAYHKLHGGKEN
		9	>gi|2622181|gb|AAB85570.1| unknown [Methanothermobacter thermautotrophicus str. Delta H]	0.3	MVISMSDLTFEDVKKEISALDKLSDLEAKKYADTGGYADVIARANNLKTTQLRKFFSAIRSMEKKADSWKSIEADFYLLKPQLANARGRDLIPEGFYEVMKKMMDKVDRGDDDEKIENFRVFVRFLESIVAYHKFYNPRS
		10	>gi|902966513|ref|WP_049685559.1| type III-A CRISPR-associated protein Csm2 [Thermoanaerobacter kivui] >gi|694166717|gb|AIS52888.1| CRISPR subtype III-A-associated RAMP protein Csm2 [Thermoanaerobacter kivui]	0.29	MPNVNIRALKNEILKEVKTAINPDKDKDGKVFSEVAKKTGHLLKESNVTVTQLRKVFTEVKRLSPEDENYKYKLKLLKAKMAYTSGRFPKLKDFQDIVDEALPIAEQNEKTLERFKDFFEAVVAYHKFFGGRE
				0.397
			type III-A CRISPR-associated protein Cas10/Csm1 [Clostridium tetani]
		1	>gi|640495152|ref|WP_024933464.1| type III-A CRISPR-associated protein Cas10/Csm1 [Clostridium botulinum]	0.79	MHICYKSLLYSFLRYVESIDKAMYKENAFKLKDKLLNPILQESYELVTKNIKKKKCKDGTFRLMNIFSNINDSKRKKFNLLKEIDINRYDNILKENGEEIDKAYCINYVKSIIKKLLQNDNEKIYFLMSKYCSNVPFINSKNCDISLFDIAKVTAAIATCKEKNKEEYILIKGDFSGIQSFIFKTSSDGALKTLKGRSVYLTLLQEICAKYIVKELGLSLCNILYSGGGNFYILASKSDENKIKLLRKQLSKLILKAYNGEIYLALGYLSFKEEDFKNFNILWKNIGEEVGFLKSKRWSELNLKESFNEIFGPLDLGGRREHSCRLCGCINKNLKEGMCDLCISFKDFSMEMKKANFYCEKIIPKADISLHNNVKDIFHELGFEIKFSDKPLKGFKNYI…
		2	>gi|724474328|gb|KHD34257.1| hypothetical protein NL50_17685 [Clostridium acetobutylicum]	0.46	MKCSSLMYAFVKYLESIDKIRYSKLTKIFPIEVNDNIEKAYKVALGNQEIKLENNCIYKLKNILSNNNNSYLPFVELKLDFNSLVDRGKGNNKIEKHLWDKYIDEILSKLECNKDNFKKVYYICMKYLTNIPAVNKENCNISLFDVCKITSAIATCQEKNYDQFILIKGDISGIQNFIYKTKKADALKTLKARSLYLTILQDLCSRYIIRKLKLNITNILYSGGGNFYIIASKEHVEELKKIRKELSGILLSAHKGELYLALAEVEFTLNDFNNFEEVWKKAGESVGKVKNKRWSEIGLKENFKKIFGPIDNGGRLERTCSICNRMSYELDEEKRCPLCQSYVKLIEDARNKKYYIEKEIKFDLVKDNYNSVNEVFQALGYNIYFSEDLPARDGKTTIY…
		3	>gi|692120808|ref|WP_032077059.1| type III-A CRISPR-associated protein Cas10/Csm1 [Clostridium drakei]	0.45	MDCNKLIYAFAKYLKNIDEERYNKLLDIFFIENNDDIEKAYMAAIGNHVSQLRNKPIYKLKNILSNTNDSYLLFIKLELDFDSLNKSKKENNMIQKCVWDNYIDEVLDKLKTSKGNFEKVYYICMKYLSNIPAINKENCDISLFDACKITSAIAKCQEKNDSQFILIKGDFSGIQKFIYKTKKADALKTLKARSFYLTLLQDLCSKYMVRKLKLNITNILYSGGGNFYIIGSKDDVAEFEKARKDLSRLLLNAHGGDLYLALSEVEFTLYDFNNFQEVWKKVGNNVGKIKNKRWSEIGLEENFDKIFGPLDYGGKLNQTCSICNCISEKLDEEKRCPLCQSYIELIEGAKNKKYYIEEETEFGLIKDSYYEVKDIFRALGYNISFTKDLYKENEETVVY…
		4	>gi|374856531|dbj|BAL59384.1| CRISPR-associated protein Csm1 family [Candidatus Acetothermus autotrophicum]	0.28	MIWQAALLHDIGKFRERALGAKHDRQARYTHEAHSQEFVLGLKSFVMNDPLWQALKSAVLRHHDPQYHDELLISAADIIAADERAEAEGYLGETTKHTAPLQSLLARLFDGPERLCFPLKPLALDQATIFAQSTNLVNQEVYKHHWLGFHQEAQRLLPQDWQGLFYLIKKYCWCVPSSATRGEEHDISLFDHLRVTAAITACLEAEGCSEDALKQLRSKDSQLRQQPLFLLLKGDISGIQGFIYTITSKGAAKGLRGRSVYLQLLTEAVARWILRRLDLPFVNLLYHGGGHFMLLLPVNAETKLAALRDELTQKVLESHGTDLYVALGVVPLSAEDFDPQRFPGRWQEAFERVKRAKQYRFSELGAEMFQRVFEPQGQANRTCDICQSEDPRGLIPDED…
		5	>gi|77997253|gb|ABB16152.1| CRISPR-associated protein, Csm1 family [Carboxydothermus hydrogenoformans Z-2901]	0.3	MIENIYWAGLLHDIGKFWQRAENKQIKHQELSGTFVHHNFASEELVALVANHHDPETKDDYILAIADKLSAGEREDQSPGGNVADEPLISLFSRIKLSRGAEGEQYIPLKLYEPDEPPFPVADKRKATLNGNGYKQLWDSFNQEFSKVKNNLNATLYLLQKYLTLIPSAAFYSRATISLYDHARTTAAIAAALYKEDIPEPTLQKIHQHLKNKNYQASELQKPYFLLVGGDIAGIQDFLYDIPLDNAAKNLRGRSFLVGYLNRLIALYLVEELGLLEPSILLIGGGRFTLLLPYSDLEKLQEIKGRVEKIIYQAFNGKLKFILGSIPLTINDLAEGNITKRWDDLGQELNREKMKPFLTLIKETPDLIFGPFDTPDNICPICGREVTGETGLCSFCQSI…
		6	>gi|397160316|emb|CCJ34758.1| CRISPR-associated protein, Csm1 family [Caloramator australicus RC3]	0.3	MNSNFNFEDLYLSALLHDIGKFYQRTELEEDKKIIYKAYESIFKAENAYGPRHQEWGAYFCENLNLNSKIVQTVRNHHNPSTIIEKIVRIADMLSAGEREGIDDKDENVKNLISVLTLVNIGKPTKSKYKQLKKASDYHELIDDEQKSVEKEYEKLWKEFKEIIKDEKDHERIYYILKEFTQNIPSAYYYSRPDISLFSHLSTTAAIASCIYRQYEDEIINGDSRAIDSLLTRLRNKQTINDEVFCLLKGDISGIQDFIFNIDMEGALKSLRGRSFYVAYILDIIARYIIKNEGLSLSNILYSGGGHFYILLPAKSMDRIKQYQKYIDEVFYKAHNLEVSVLLAAEKFSVSKLATANFSEVFDGVGKRLYKEKNRKFNSILNDEFFKPTKLLDDICPYC…
		7	>gi|654585899|ref|WP_028052954.1| type III-A CRISPR-associated protein Cas10/Csm1 [Carboxydothermus ferrireducens]	0.29	MIENIYWAGLLHDIGKFWQRAENKQIKHQELSGTFVHQNFASEELVALVANHHDPETKDDYILAIADKLSAGEREDQLPGGNVANEPLISLFSRIKLSRGAEGEQYIPLKLYEPDEPPFPVADKRKATLNGSGYKQLWDSFNQEFSKVKNNLNATLYLLQKYLTLIPSAAYYSRATISLYDHARTTAAIAAALYKEDVPEPTLQKIHQLLKSRNYQAPELQKPYFLLVGGDIAGIQDFLYDIPMDNAAKNLRGRSFLVGYLNRLIALYLVEELGLLEPSILLIGGGRFTLLLPYSDLEKLQELKGRVEKIIYQAFNGKLKLILGSIPLTINDLAEGNITKRWEELGQVLNREKMKPFLSLIKETPDLIFGPFDTPDNICSICGREVTGETGLCSFCQSI…
		8	>gi|950363960|emb|CEJ42353.1| CRISPR-associated protein, Csm1 family [Chrysosporum ovalisporum]	0.31	MTNSQKVALHVLQQAIATLAKWAHHNIQLPFEPESLNDSEKTAVKNAQKLVGWEENQQVGILSLLFDSVNLSDESRNDTTKPHYHPLKAIDNDHKEYPDIPYPLNSAPDEEAQTAFKVEINEALANSIKDNWQNLSLLMLILEKFASCLSFGESDVALVDIARTTAALAVALLNNPTQEISLIAGDLSGIQKFIYSISSEGALKSLRARSFYLELVTEEVVQQLLYQLQLPRTNIIYAGGGNLYILASATPENQNIVNQIRKQFNEWLLKEFQGKVFLALDCLNFSIKELKDKFAENWSKATKNLAVYKSRKFAENKFSEFITPSHSHEPCRVCHRDDVETLKPLNSQEPDSVSACETCRSMFDLGSQLFGVKAIVRSTNKEINNALHTISFKLPSGDI…
		9	>gi|149794065|gb|ABR31513.1| metal dependent phosphohydrolase [Thermosipho melanesiensis BI429]	0.32	MINLSVEKVFLAGIFHDIGKFYIRANFGDLKKNIYEEYKYFIEGDNKYGPRHQEWGAYFYKNSNLPFKDEIEGAILNHHKPNSVLSKLISVADHISATEREGEHPEDKVKNMKSMLSMVSFSNDQKKGKYKKVSKLSEKFDLLEKEDENVEETYKNLWREFEKVINSIPRNKNPKISFPIFEKIYYILKEYTSNIPSAFFYNEPDISLFSHLSTTAGIAVAIFKQFEEEIKLGNIKILENIDSKNYDEKILGIVKGDISGIQDFLYNISQERAVKKLRGRSFYITYLLEIVAKYIIENEGLSISNILFNGGGHFYLIVPAKTIDKLEKYQKYIDEVMYKAHGIGLNINIAGEKIAPKELNSEIYKRVSQLVERKKYTKLYSLISYDFHKIFESKNLSED…
		10	>gi|333751796|gb|AEF96875.1| CRISPR-associated protein, Csm1 family [Methanotorris igneus Kol 5]	0.31	MEKLGEIIALGGLLHDIGKVAQRISGGKHSSIGAEFLRDLANKTKIKEYEILALFSEFHHKGDMVNEKGEIKEELKEKIKKVAEEFKISERELINALWLVYESDNISSSEREEASKLNIRNPLKSIFTSIDIGKGSVESKYYPLMPLEFKREFPSPQKNIEEKKIKEDYIDLKNNIYDDLKKLKKISIDRILVILEHYLTFVPAMTSKENDISLYDHLRMTSAIALALYHYHKNDFNMDPKDFINKLNNDEMKFLLIEADFSGIQDFIYTINIRGALKYLRARSTYLDLLSWDIVMEIIERLNLTRANVIYNGGGNFIILAQNTEEAKSKLKEIRKEVCKWLYDKFEGSLYLAMEWIEITPKELKDFKNGELWKELKAKVDERKNKRFVDIINEISLID…
				0.381
			Highest sequence conservation	% identity
		1	Clostridium botulinum CDC54088; dust from Mendoza, Argentina	0.787143	0.0168628
		2	Clostridium drakei strain SL1; coal mine pond sediment, 1997	0.467143	0.0276642
		3	Clostridium acetobutylicum, Strain GXAS18-1 Nanning City, China 2011	0.461429	0.0330532
		GTC-14772 Phage/Plasmid CRISPR	- Cas3 - Cas5 - Cas7 - Cas8b - Cas6 -		Predicted AA sequence
		1	CRISPR CAS3		MILSRPNEELNTHIELILKQYKEMNIKKGVDEIVKNIVNKLCNENKKIKNCKDIIYDLFIQSLVLHDEGKKNPFFQSYIGNEEYKDYKYGKINKHHAEISTIYYCIEMYNRYVITTKKRVLQEYLKDMILSFAYGIYKHHTSLDNLDKDKLIHDLINYYEKNTEQFINIDITNIEFLYRFKNRGILEYTDSYTYYLLFKFSYSILVTCDFMSVYNSNYAKQLIINTVEDKLKNKINKKFNDYNVIKSIRNYETNPSLPLSKLNRLRTEMFLESEKNIVLNKDKHLFYLEAPTGCGKSLISLNLALQLFNEKHNNLYYIAPFNNIIEQTCEVMKDSFYEDTVIINSKEDVFISDTESINYDKDFLNMQMINYPISLISHVRFFGVLFSGNRMKNLMMPTL…
		2	CRISPR CAS5		MECLKFDIYGKYAFFKNPENNIGVEFSFEHIHKPCLLGILGCILGLDGKDSITKDNPYPEYYKRLKDIKVSIVPNKPIFNKFKETTTNTMGFANKGFAQVLNREVLQNVRWTIHILKESIDKELYNRLYGLLESHESSYPLYLGNNAYPAKISNVELVEVDRIDSAEEITISSIFDKNIIEEKYDFTENDLVLPYDLIIYAPEDINKLLLYTYNWFEFTNLMIDVKNEDNLYTHGDEVLYFM
		3	CRISPR CAS7		MVKIYCMQQIKKMKVRKGKIKMNNNVYGIIGIGVKNANWNAGWDKLPKRNGEDIVKGSSYALQYCIKNQWNNIGKKVFGIKTMQKEGTCTTLTQRYTDLFDEEDKGINKKDKDKDKEEKIKKVKNNLLSCKDILHFGVAYTGATSMNIKGLVQFTDGENKFEETDIIEEKILSPFGNPKADDPTMNTNGTKYTTDEAHYIYDFSVFPKEYNKYIDDGFDGYTEEDYEDFKRMVLIAVSNYNSKAKAGCKNEFGMFIKVKEDNNYLLDLNCLQDYVKVYKNDEDKVVYNLSMINNIIDNVKDKIEDIEIYYNPRTIELEGFNKNEKTTMFDLITRKEI
		4	CRISPR-associated protein Cas8b/Csh1		MLNELMEAIGYDNMLKTIKDSVNVSNSLYVKVPMDRLVEDKDFVIVGKEPEINQLKQLEWFKARECLNKYIAPNKAIVQGTKYKYPKMVSSTHENCIIFNWDNFLKHKNTTKDINLSLQNLISEFLSTLDKKDFLEYYTKNIDNIVQFINKNELNKIMLKIFIDVEEEKCERDYAEYLKSKLFDNDTIHKINDKTYGRLSQFYTMNSKKPYLSHMLKTTDEIHLVDEKEVLNTFYLKQYMDVVKFQKIDCGIGNIVFDMEFNSSTKKYYINFYKNNPYKVIDDLRDNIYIENVTSNKKSKEKVITKYSELSKYILQLTDFKIKGYYSEKDNTEDKFKTFATMYFRHLIDLNDGNFNAFKSIYKNMMKNLLKLYIYDEDIYKITNIINFDVCMTDYLFKS…
		5	CRISPR-associated Cas6		MNKSYHEIKTSVYLNNNIHSSDMYEKLSNFINFSFNNSQVLSCLHKSKGFKHYSFSGLYPIERDYVYKSDEIYSFLFRTHDKEVANEFVKSIMNLNNDDFITTEVSLKTWNYENIKHIDNLTPTVFTLNNGLRWNLNDGMEIAKERIFNNLMKKYNCFNNTSFSFGYNDMIDDIIIKNECPIVINYKGIKFLGYKFRVKFKENPIAQEIANFAVVDGIGEKSSSFGMGFVKPYFRRYKEC
		6	Prophage anti-repressor		MVNENIKEIKRIGVTEILGKEIEFYGSWEEPYFLAKSVAEWLDERDGTTVARKVDEEEKLIHTICVGGQNREITTFTEDGLYEALMKSRKPVAKPLKKKIKQYLKQIRKTGGTVEEGREEEFVDKYFPSFSDEVKLSMVQDLLRTNKELKPKAEYHDKVLRPTDENFKKLLTASEIAKDLGMSAQKFNKILNELHIIYKKSKTWMLYAEYEHMIPEYFDYHITEYGQTLKYKEKGRKWIVEHIEEWKNNIK
		7	Predicted protein		MDIKFEKKFKNGNKIIAVTREVTTYFKVVHDGEEGNEIKEMNTIDELKTKTWSGLSDEFWNKVDRL
		8	Predicted phage protein		MNLNSLELKEYKNRKELCGTLEVKPAQGGRNIKLQDEEFKRYFEWKKTTGHKLRVVKIYDVPKPREDKRGQNPNSHHNQNGLYGKYIDITLINFLTKVQKTLEKNEEMYFTVSILAQYSYMVNMNYITVKNNRQKFYQYLYGCNNKINPTEVKDVLLSLSDTIRSVMNSALDRLERQGIIDFEQGYIIVEEDEKEKYKTYIRMVTGAETENIIKWEKEILEQMQTEKGKLRFNNKKMNKFYFDLDNKIKSEYPYIKQVFQGYKIKVLKEIKISDAKFKSAKEKLNKVVIEETLKKCERKRNKVVEDKGEYIELHNSNWNGWDLDRLDQNYISNALEIINTVVKTGVENIAGKIRNIEVVKNKSKKNNKITRGMYDDFIMSLCYDGFTKDEAILLYPFEE…
